# Supplementary material for: Active Ingredients and Action Mechanisms of Yi Guan Jian Decoction in Chronic Hepatitis B Patients with Liver Fibrosis
Source: Evid Based Complement Alternat Med. 2019 Sep 3;2019:2408126. doi: 10.1155/2019/2408126 (PMC6745137; doi:10.1155/2019/2408126)
Supplement: Supplementary Materials — Table S1: potential targets for docking analysis. Table S2: selected compounds for docking analysis. Table S3: active ligands as reference for the docking analysis. Table S4: key pathways involved with the YGJD acting on CHB-related liver fibrosis. Table S5: raw data of the docking results. [file 2408126.f1.zip]

Archive with 2 entries (2 files):
- 2408126.f1/Supplementary Materials Table S1-S4.docx
- 2408126.f1/Supplementary Materials Table S5_Raw data of the docking results.xlsx
