# Supplementary material for: Active Ingredients and Action Mechanisms of Yi Guan Jian Decoction in Chronic Hepatitis B Patients with Liver Fibrosis
Source: Evid Based Complement Alternat Med. 2019 Sep 3;2019:2408126. doi: 10.1155/2019/2408126 (PMC6745137; doi:10.1155/2019/2408126)
Supplement: Supplementary Materials — Table S1: potential targets for docking analysis. Table S2: selected compounds for docking analysis. Table S3: active ligands as reference for the docking analysis. Table S4: key pathways involved with the YGJD acting on CHB-related liver fibrosis. Table S5: raw data of the docking results. [file 2408126.f1.zip › 2408126.f1/Supplementary Materials Table S5_Raw data of the docking results.xlsx]

## Sheet: Docking Result
	CCL18	DVL2	CX3CL1	MAPK12	PHF5A	BRD1	PRKAB1	TGFB3	INHBA	NT5E	CYP2C9	MAPK3	IL1B	EPAS1	LNX1	KAT6A	CDK2	IGF1R	ARHGDIA	EGFR	IFNA1	CAPN1	ITGA5	UBE2E1	RAC3	FOS	IL8	RNF4	LPA	CSNK1D	CYP2B6	HGS	MTA1	POFUT2	KAT5	CYP1A2	HIST1H4I	FN1	XIAP	RANGAP1	QSOX1	JUN	ABL1	PLAU	INPP5B	TREM2	CDK9	HCRTR1	GSN
YGJ002	-4.5	-5	-3.6	-5.4	-4.1	-4.5	-3.9	-4.3	-4	-5.6	-5	-5.7	-5.1	-6.3	-4.5	-6	-6.1	-5	-5.8	-6.1	-4.4	-5.4	-4.6	-4.8	-5.1	-4	-4.6	-4.7	-4.7	-5.6	-6	-4.1	-3.7	-5.5	-5.8	-6.2	-3.9	-4	-4	-4.7	-5.8	-4.5	-5.9	-5.7	-5.3	-5	-5.6	-5.1	-5.6
YGJ003	-5.1	-4.6	-3.5	-5.1	-3.7	-5.3	-4.2	-4	-4.2	-5.6	-5	-5.6	-4.5	-5.9	-4	-5.3	-5.5	-4.8	-4.9	-5.5	-4.4	-5	-4.8	-4.1	-6.1	-3.4	-4.3	-4.3	-5	-5.7	-5.4	-3.7	-3.5	-5.2	-5.3	-6.3	-3.5	-4.5	-4.4	-4.3	-6	-4	-5.4	-5.5	-5	-4.3	-5.1	-5.3	-5.5
YGJ004	-6.7	-6.5	-4.3	-7.1	-5.2	-6.6	-5.1	-5.7	-6.5	-8.4	-6.9	-7.7	-6.2	-7.5	-4.8	-7.2	-8.1	-6.8	-6.6	-7.6	-6.3	-6.4	-6	-5.6	-6.3	-4.7	-6.1	-5.1	-6.2	-7.9	-8.1	-5	-4.6	-7	-7.3	-9.4	-4.4	-4.8	-5.4	-5.1	-8.1	-5.5	-8.8	-6.5	-5.5	-5.3	-8.4	-7.2	-6.6
YGJ005	-7.1	-7.4	-4.6	-7.5	-5.2	-7.4	-5.7	-6.3	-7.3	-8.7	-8.5	-9.4	-6.8	-6.7	-5.1	-8.4	-9.7	-7.4	-7.3	-9.4	-6.6	-6.9	-5.8	-6.3	-7	-5.5	-6.8	-5.4	-6	-8.5	2.1	-5.6	-5.3	-8.8	-8.9	-9.5	-5	-5.7	-6.5	-6.1	-9.5	-6.1	-8.3	-7.9	-7.8	-5.6	-8.8	-9.1	-7.2
YGJ006	-7.5	-7.5	-4.8	-6.9	-5.5	-8	-4.4	-5.7	-8.2	-7.8	-8.2	-8.3	-6.8	10.7	-5	-8.4	-8.2	-7.6	-6.8	-9.2	-5.9	-7.5	-5.6	-6.4	-6.4	-5.4	-6.4	-5.1	-6.5	-8.5	6.3	-5.7	-4.9	-9.1	-8.2	-3.8	-5.5	-5.8	-6.3	-6.4	-9.9	-6.5	-8.4	-7.3	-7.7	-5.9	-7.9	-8.6	-7.8
YGJ008	-6.3	-6.8	-4.9	-7.6	-4.6	-8.6	-5.2	-6	-7	-9.2	-7.6	-8.1	-6	-7.7	-4.7	-7.2	-7.9	-6.9	-6.4	-8.1	-5.8	-6.5	-5.2	-5.5	-6.5	-4.7	-6.5	-5.5	-7	-8.1	-8.3	-5.1	-5.1	-7.1	-6.9	-9.7	-4.4	-5.3	-5.8	-5	-8.1	-5.7	-9.3	-7.1	-7.1	-5.6	-8	-7.2	-6.6
YGJ009	-8.2	-7.6	-5.4	-9.2	-5.3	-8.2	-6.4	-6.7	-8.8	-9.7	-10.1	-8.9	-6.6	20.6	-5.6	-9.1	-8.6	-8.7	-7.8	-9.6	-7.4	-8.6	-5.8	-8.1	-8.2	-6.5	-8.4	-6.2	-6.6	-8	11.6	-5.9	-5.7	-9.9	-8.4	6.3	-5.5	-5.7	-6.8	-6	-12.4	-6.8	-5.6	-8.5	-8	-7	-5.3	-10.7	-7.6
YGJ012	-6.4	-7.4	-5.3	-7.9	-5.4	-7.6	-5.2	-6.9	-7.4	-9.6	-8.7	-9.7	-5.7	-3.9	-4.9	-7.9	-9.4	-8.4	-6.8	-9.5	-6.4	-7.1	-6.3	-6	-7.7	-5.6	-6.8	-5.3	-5.9	-8.9	-6.7	-5.9	-5.4	-8.1	-7.9	-11	-5.4	-6	-6.4	-5.3	-9.1	-6.8	-9.9	-7.1	-7.5	-6.5	-8.9	-9.5	-7.6
YGJ015	-6.8	-6.5	-4.6	-8.3	-5	-6.8	-5.6	-5.6	-7.6	-8.2	-7.9	-9.9	-6.6	2.7	-4.9	-7.8	-8.6	-7.7	-7.2	-8.8	-6	-7	-6	-6.5	-6.8	-5.1	-6.6	-5.4	-6.4	-8.4	-3	-5.7	-5.2	-8.6	-7.6	-9.5	-5.2	-5.6	-5.9	-5.7	-8.5	-6.8	-8	-6.9	-5.9	-5.9	-8.9	-8.1	-6.4
YGJ016	-3.7	-3.2	-2.6	-3.5	-2.8	-3.8	-3.3	-3	-2.9	-3.6	-3.3	-3.7	-3.6	-4.2	-3.4	-3.9	-3.9	-3.3	-3.8	-3.9	-3.3	-3.8	-3.8	-3.6	-4.1	-2.6	-3.2	-3.2	-3.1	-3.5	-3.5	-3	-2.5	-4.1	-3.8	-3.8	-2.5	-3.6	-3.6	-3.2	-4	-2.7	-3.4	-4.1	-4	-3.4	-3.3	-3.7	-4.5
YGJ017	-6.7	-6.9	-5	-7.7	-5.2	-7.4	-5.7	-5.9	-6.9	-8.3	-7.9	-9	-6.6	-6.9	-5.4	-8.3	-9.4	-7.6	-7.2	-8.1	-6.7	-6.8	-5.6	-6.6	-7	-5.5	-6.2	-6.1	-7.2	-9.6	-5.4	-6.1	-5.1	-8.3	-8.4	-9.6	-5.4	-6.1	-6.2	-5.9	-9.4	-5.7	-9.8	-8.4	-7.6	-6.2	-8.8	-8.1	-7.7
YGJ019	-7.1	-7.8	-5.6	-8.1	-5	-7.6	-5.8	-6.2	-7.5	-8.9	-8.9	-9.7	-6.6	-4.4	-5.4	-8.6	-9.6	-8.2	-7.5	-9.9	-6.9	-7.1	-6.2	-6.4	-7.4	-5.7	-7	-6.1	-7.7	-9.5	-1.8	-7	-5.7	-9.2	-8.6	-9.1	-5.3	-6.1	-6.2	-5.8	-9.6	-6.3	-10.4	-8.4	-7.6	-6	-9.1	-9.1	-8.3
YGJ024	-5.6	-5.9	-3.8	-6.3	-4.1	-5.7	-4.7	-4.6	-5.6	-6.6	-6.1	-6.8	-5.4	-6.7	-4	-6.5	-7.1	-5.9	-5.8	-6.7	-5.2	-5.6	-5.2	-5.2	-5.5	-4.3	-5.6	-4.4	-6.6	-6.8	-7.3	-4.4	-4	-5.9	-6.3	-8.5	-4.4	-4.4	-4.7	-4.6	-7.3	-5	-7.6	-5.7	-5.3	-4.8	-7	-6.6	-6.1
YGJ027	-6.2	-6.8	-4.5	-8.4	-4.6	-5.7	-4.5	-5.3	-7.3	-7	-7	-7	-5	-4.4	-4.5	-5.9	-7.4	-7.2	-5.4	-6.8	-5.6	-5.6	-5.3	-5.5	-5.7	-5	-6	-5.5	-6.4	-6.5	-9.4	-4.3	-4.5	-6.7	-5.7	-4.1	-4.5	-5	-5	-4.5	-7.1	-5.9	-8.4	-5.5	-5.5	-5.1	-8.3	-7.3	-5.7
YGJ037	-4.8	-5.4	-3.9	-6.2	-3.9	-6.3	-4.1	-4.3	-5.4	-7.1	-6.2	-6.6	-4.7	-5.6	-3.9	-5.4	-6.3	-5.5	-4.9	-5.9	-5	-4.4	-4.7	-4.1	-6.1	-4.1	-5.6	-4.5	-5.5	-6.6	-7.3	-3.9	-3.7	-5.9	-5.3	-7.7	-3.6	-4.5	-4.3	-3.7	-6.6	-4.4	-7.4	-5	-5.1	-4.4	-6.4	-6	-4.7
YGJ040	-5.1	-5.6	-3.8	-6.1	-4.1	-5.9	-4.3	-4.5	-5.3	-7	-5.9	-6.5	-4.6	-6.2	-4.2	-5.5	-6.1	-5.8	-5.1	-6	-4.8	-5	-5.2	-4.3	-6.1	-3.8	-5.4	-4.3	-5.4	-6.9	-6.8	-4.5	-3.8	-6.4	-5.4	-8	-3.8	-4.7	-4.4	-4	-6.8	-4.5	-7.1	-5.6	-5.3	-4.7	-6.2	-5.8	-5.5
YGJ051	-7.3	-7.2	-5.2	-8.8	-5.1	-8	-5.8	-5.7	-7.8	-9	-9	-9.7	-6.4	-7.4	-5.3	-8.5	-9.5	-8.4	-7.6	-9.3	-6.8	-7	-6.2	-6.1	-8.6	-4.8	-7.6	-6.1	-7.5	-8.8	-9	-6.5	-5.6	-8.6	-8.7	-11.7	-4.8	-6.2	-6.4	-6.3	-9.3	-6.1	-9.8	-7.6	-7.7	-6.9	-9.7	-8.1	-7.9
YGJ054	-6.1	-7	-5.1	-7.1	-4.4	-5.5	-4.5	-5.1	-7	-6.6	-7	-6.6	-5.1	-2.5	-4.1	-6.7	-7.4	-6.6	-5	-6.3	-5.5	-5.8	-4.8	-5.3	-5.5	-4.6	-6.6	-4.8	-5.8	-6.8	-9	-4.5	-4.4	-6.2	-6.6	-4.5	-4.6	-5.4	-4.9	-4.7	-7.1	-5.2	-8.5	-5.8	-5.3	-5.3	-7.5	-7.5	-5.4
YGJ055	-6.5	-6.7	-4.7	-6.9	-4.8	-6.4	-5.3	-5.5	-7.1	-6.7	-7.2	-8.2	-5.4	-1.3	-4.5	-6.6	-8.9	-6.8	-5.1	-7	-5.8	-5.8	-4.9	-5.5	-5.6	-4.9	-6.7	-5.4	-6.6	-7.1	-9.6	-4.3	-4.4	-6.7	-6.4	-4.8	-4.7	-5.5	-4.9	-5.2	-7.3	-6	-7.4	-5.7	-5.6	-5.2	-8.1	-7.5	-5.7
YGJ061	-7.4	-8	-5.6	-8.3	-5.3	-7.7	-5.9	-6.5	-8.1	-9.6	-9.4	-10.2	-7	-4.1	-5.2	-8.6	-9.9	-7.9	-7.6	-10.2	-6.7	-7.6	-5.9	-6.7	-8	-5.7	-7.2	-6.4	-7.6	-9.9	1.7	-6.3	-5.9	-9.5	-8.9	-9.2	-5.4	-6.2	-6.4	-5.9	-9.4	-6.6	-10	-8.1	-8.1	-6	-9	-9.5	-7.7
YGJ063	-5.7	-6.7	-4	-7.5	-4.5	-7.4	-4.5	-5.8	-7.1	-7.9	-7.5	-8.6	-6.3	-6.1	-4.8	-7.6	-8	-7.3	-6.4	-8.1	-6	-6.5	-5.7	-5.8	-7.2	-4.8	-6.2	-4.8	-6.9	-8.3	-9	-5.4	-4.9	-7.6	-7.7	-9.6	-4.3	-5.2	-5.7	-4.9	-8.2	-5.7	-9	-6.3	-6.4	-5.5	-8.1	-7.2	-7.3
YGJ075	-5.9	-6.4	-4.3	-7.5	-5.1	-6.7	-5.2	-5.1	-6	-7.6	-6.8	-8.3	-6.1	-2.4	-5.1	-7.7	-8.1	-7.5	-6.7	-7.4	-5.8	-6.6	-5.4	-5.5	-6.1	-4.5	-5.7	-4.7	-6.1	-7.9	-5.8	-5	-4.5	-7.5	-7.4	-6.5	-4.9	-5.7	-6	-5.3	-8.2	-5.5	-7.8	-6.9	-5.9	-6.4	-7.7	-7.4	-7
YGJ077	-7	-7.6	-4.7	-7.7	-5.5	-7.9	-5.8	-5.7	-7.9	-9.1	-7.9	-9.6	-6.6	-2.9	-4.8	-8.2	-9.5	-7.3	-6.7	-8.7	-6.6	-7	-5.7	-6.4	-7.2	-5.6	-7	-5.7	-6.1	-8.8	-5.8	-5.7	-5.4	-8.7	-8.3	-7.6	-4.8	-5.9	-6.1	-6	-8.6	-6.3	-9	-7.6	-7	-5.9	-8.5	-8.5	-6.9
YGJ079	-5.7	-5.7	-4.5	-7.5	-4.5	-5.3	-4.8	-4.6	-5.7	-6.4	-6.5	-6.5	-5.1	-3.7	-4.6	-6.3	-7.3	-6.5	-5.1	-5.8	-5.4	-5.9	-4.8	-5.1	-5.7	-4	-5.6	-5	-5.6	-5.9	-8	-4.3	-4	-6.3	-6.4	-6.3	-4.4	-5	-4.5	-5	-6.4	-5.2	-7	-5.7	-5.7	-5.4	-7.5	-6.4	-6
YGJ085	-6.5	-6.1	-4.2	-6.8	-5	-6.1	-5	-5.2	-6	-7.1	-6.9	-7.3	-5.4	-2.8	-4.3	-7.2	-6.9	-6.5	-5.6	-6.4	-5	-6.1	-4.6	-5.3	-5.9	-4.5	-5.5	-5	-5.6	-7.1	-4.6	-4.8	-4.3	-7.1	-7.2	-5.1	-4.9	-5	-5.4	-5.4	-7.9	-5.2	-7.8	-6.6	-5.4	-5.4	-7.3	-7.5	-6.1
YGJ093	-6.5	-6.6	-4.4	-7.4	-4.9	-6.4	-5.1	-5.3	-6.7	-7.2	-7.5	-8.2	-6.5	-0.5	-5	-8.1	-8.4	-7.5	-6.2	-8.6	-5.5	-6.8	-5.2	-5.8	-6.3	-4.7	-6.1	-5.2	-6.4	-8.8	0.3	-5.6	-4.5	-7.9	-8.1	-5	-5.1	-5.6	-5.8	-6	-8.5	-5.6	-7.5	-7.4	-6.8	-6.3	-8	-8	-7.9
YGJ094	-6.8	-6.3	-4.6	-6.3	-4.3	-6	-4.4	-5.5	-7.1	-7.1	-7.5	-6.2	-5	2.9	-4.3	-6.6	-6.3	-6.9	-5.6	-6.7	-5.7	-6	-4.7	-5.3	-5.4	-4.5	-6.3	-4.9	-6.2	-5.8	-7.8	-4.6	-4.6	-7.4	-6.4	-2.7	-4.8	-4.5	-5.2	-4.7	-8	-6.2	-5.4	-5.9	-5.1	-5.6	-7.2	-7.5	-5.6
YGJ099	-6.3	-6.1	-4.5	-7.4	-5.2	-6.5	-5.7	-5.1	-6.3	-7.3	-6.7	-7.4	-6.5	-4.6	-5.2	-7.4	-7.6	-7.5	-6.1	-7.3	-5.5	-6.6	-5.4	-5.9	-6	-4.7	-5.7	-5.2	-5.8	-7.8	-5.7	-5.2	-4.5	-7.8	-7.4	-5.4	-5.1	-5	-6.1	-5.8	-7.7	-6.2	-7.7	-7.1	-6.2	-6.6	-7.6	-7.7	-7
YGJ103	-5.5	-5.6	-4.2	-7	-4.5	-6.6	-5.5	-5.3	-5.4	-6.7	-6.4	-7.5	-6.2	-7.4	-5.2	-7.2	-7.4	-6.9	-6.7	-6.9	-5.4	-7.4	-5.4	-5.7	-6.2	-4.4	-4.9	-5.1	-5.7	-7.4	-6.8	-5.2	-4.4	-7.1	-7.6	-7.9	-4.8	-5	-5.4	-5.6	-7.4	-5.4	-7.2	-7.3	-5.9	-6.1	-7	-7.1	-8
YGJ104	-8.2	-7.7	-5	-6.5	-5.8	-6.5	-4.7	-5.8	-7.8	-8.6	-8	-6.2	-5.6	13.5	-4.8	-7.2	-7	-6.4	-5.9	-7.2	-6.8	-7.4	-5.2	-6.4	-6.1	-5.8	-7	-5.9	-6.7	-6	-6.8	-5.1	-5.1	-9.1	-7.5	9.2	-5.2	-5.1	-5.8	-6.1	-9.3	-6.6	-5.5	-7.1	-6.6	-6.1	-5	-9.3	-7
YGJ114	-6.1	-6.6	-5.2	-7.9	-5.2	-7.1	-5.5	-5.6	-7.3	-9.2	-7.7	-9	-5.8	-3.2	-5.2	-7.4	-9.3	-7.5	-6.4	-8	-5.8	-6.9	-5.4	-6	-6.9	-4.9	-6.6	-5.5	-6.5	-8.8	-6.6	-5.2	-5.1	-7.9	-7.1	-10.2	-4.7	-5.3	-5.7	-5.2	-8.2	-6.6	-8	-6.5	-6.7	-5.9	-9.6	-7.8	-6.5
YGJ115	-4.7	-5.5	-3.9	-5.6	-4.3	-6.1	-4.2	-4.2	-4.8	-6.7	-5.7	-6	-5.1	-5.9	-4.2	-5.2	-5.8	-5.1	-4.8	-5.7	-5.2	-5	-4.9	-4.3	-5.9	-3.8	-5.5	-4.4	-5	-6.4	-6.6	-4.2	-3.8	-6.2	-5.1	-7.1	-3.7	-4.4	-4.5	-4.2	-6.5	-4.7	-6.2	-5	-5.6	-4.8	-6	-5.5	-5.2
YGJ121	-5.4	-6	-4.2	-6.5	-4.4	-6.7	-4.9	-4.7	-5.2	-7.5	-6.4	-7.3	-5.4	-6.6	-4.6	-6.1	-7	-6	-5.7	-7.1	-5.3	-5.9	-5.3	-5.3	-6.5	-4.3	-5.8	-5	-6	-7.2	-7.2	-4.9	-4.3	-7	-6.2	-8.9	-4.4	-4.9	-4.8	-4.5	-7.1	-4.8	-7.8	-6.3	-5.8	-5.1	-7	-6.7	-6
YGJ128	-5.5	-5.8	-4	-6.3	-4.2	-6.4	-4.6	-4.7	-5.3	-6.6	-5.7	-6.6	-4.9	-6.3	-3.9	-5.5	-6.4	-5.7	-5.7	-6.5	-5	-5.5	-4	-4.4	-5.8	-4.2	-5.5	-4.7	-6.1	-6.6	-7.3	-4.4	-4	-6.2	-5.5	-7.5	-3.7	-4.7	-4.8	-4.1	-6.5	-4.7	-7.4	-5.2	-5.2	-4.8	-6.6	-6	-5.8
YGJ132	-3.7	-3.1	-2.7	-3.8	-3.5	-3.8	-3.6	-2.7	-3.4	-4	-3.6	-3.8	-4.2	-4.5	-4.1	-3.9	-4.6	-3.5	-4	-4.5	-3.2	-4.3	-4	-3.6	-4.5	-2.9	-3.1	-4	-3.4	-3.7	-3.2	-3.4	-2.7	-4.9	-4.5	-4.2	-3	-4	-3.8	-4.2	-3.9	-3	-3.8	-4.6	-4.5	-4.1	-3.3	-3.7	-5.2
YGJ137	-4.3	-5.1	-3.4	-5	-3.9	-5.6	-3.6	-4	-4.6	-5.9	-4.9	-5.3	-4	-5.2	-3.5	-4.8	-5.2	-4.5	-4.4	-5.1	-4.3	-4	-3.8	-3.7	-4.9	-3.6	-5.1	-3.7	-5	-5.3	-6	-3.6	-3.5	-5.3	-4.7	-6.4	-3.4	-3.6	-4.2	-3.4	-5.8	-3.8	-5.9	-4.3	-4.6	-4	-5.3	-5.4	-4.5
YGJ140	-6.7	-6.1	-4.4	-7.2	-4.6	-7.2	-5.5	-5.4	-6.5	-7.9	-7	-7.7	-6	-6.7	-5	-7.5	-7.7	-7.1	-6.5	-7.5	-6.1	-7	-5.8	-5.7	-6.8	-4.6	-5.8	-5.2	-6.6	-7.9	-6.7	-5.2	-4.6	-7.7	-7.8	-9	-4.5	-5.2	-5.9	-5.4	-7.8	-5.8	-8.6	-7	-6.4	-6.4	-7.5	-7.1	-7.8
YGJ142	-6.4	-6.7	-4.5	-8	-4.7	-6	-5.4	-5.3	-6.6	-7.9	-7.6	-8.2	-6.2	-2.9	-5.2	-8	-7.8	-7.7	-6.7	-8.2	-5.5	-6.8	-5.8	-6.2	-7.4	-4.9	-6.1	-5.3	-5.7	-7.6	-3.4	-5.6	-4.2	-7.6	-7.9	-6.8	-4.7	-5.4	-6	-6	-8	-5.5	-7.3	-7.1	-6.4	-6.1	-7.5	-7.8	-8.3
YGJ144	-6.2	-7.2	-5	-7.7	-5.3	-7.6	-5.3	-5.5	-6.5	-9.6	-7.6	-8.7	-5.8	-7	-5.6	-7.4	-8.1	-7.2	-6.8	-7.4	-5.8	-6.6	-5.2	-5.5	-8.3	-5	-6.6	-5.6	-6.6	-8.8	-8.3	-5.3	-5.2	-7.5	-7.2	-10.4	-4.7	-5.7	-5.8	-5.2	-9.4	-5.6	-9.4	-7	-6.9	-6.3	-8.1	-8.4	-6.3
YGJ147	-4.6	-4.6	-3.2	-5.7	-3.6	-5.1	-4	-3.9	-4.4	-5.5	-4.9	-5.4	-5.1	-5.9	-4.3	-5.5	-5.3	-5	-5.1	-5.3	-4.2	-5.3	-4.3	-4	-5.2	-3.4	-4.6	-3.9	-4.7	-5.6	-5.6	-4.1	-3.7	-5.4	-5.5	-6.1	-3.5	-4.2	-4.1	-4.1	-5.6	-4	-5.7	-5.8	-4.7	-4.4	-5.2	-5.4	-5.4
YGJ154	-5.9	-6.2	-4.1	-7.4	-4.9	-6.4	-5.1	-5.1	-5.9	-8	-6.7	-7.3	-5.8	-7	-4.5	-6.8	-7.4	-6.5	-6.1	-6.8	-5.3	-6.1	-5.5	-5.2	-6.3	-4.5	-6.3	-4.7	-6.7	-7.4	-7.7	-5.1	-4.6	-7	-6.7	-8	-4.6	-5.1	-5.4	-5.3	-7.6	-5.1	-8	-6.1	-5.4	-5.6	-7.6	-6.7	-6.7
YGJ160	-7.7	-7.7	-5.1	-8.5	-5.9	-6.7	-4.6	-6.7	-8.1	-7.4	-9.3	-8.7	-7.1	24.2	-5.1	-8.8	-8.2	-8.6	-6	-9	-7.1	-8	-6.1	-6.5	-6.6	-6.8	-6.9	-5.4	-6.6	-7.8	26.9	-7	-5.8	-9.2	-7.4	15	-5.9	-6.1	-6.7	-6.2	-7.9	-6.2	-6.1	-7.4	-7.4	-6.2	-9	-9.7	-6.2
YGJ163	-6.5	-7	-4.7	-7.3	-4.5	-6.2	-4.7	-5.4	-6.2	-7.5	-7.2	-7.8	-6.1	-7.5	-4.8	-7.2	-7.8	-6.9	-6.4	-7.4	-6.1	-5.9	-5.4	-5.4	-6.4	-4.7	-6	-4.7	-6.4	-7.2	-8.3	-5.2	-4.8	-6.7	-6.9	-8.6	-4.4	-5	-5.1	-5	-7.5	-5.4	-8.4	-6.3	-5.9	-5.5	-7.9	-7.2	-6.4
YGJ176	-5.1	-6	-3.7	-6.6	-3.9	-4.4	-4.3	-4.2	-5.3	-5.1	-5.6	-5.5	-4.7	-3.2	-4.1	-6	-6	-5.1	-4.8	-5.5	-4.8	-5.4	-3.7	-4.5	-5.5	-3.6	-5.2	-4	-5.4	-6.4	-7.3	-4.1	-3.6	-5.9	-6	-4.6	-4.3	-4.2	-4	-4.1	-6.1	-4.5	-5.6	-5	-4.9	-4.6	-6.2	-5.9	-5.4
YGJ184	-6.4	-5.9	-4.1	-7.4	-5	-6.4	-5.1	-5.2	-6.3	-7.2	-7.2	-8.5	-6.1	-2.1	-5.4	-7.7	-7.7	-8.2	-6.5	-8.2	-5.8	-7.2	-5.6	-5.8	-7.6	-4	-5.9	-4.9	-6	-8.2	-3.7	-5.3	-4.6	-8	-8	-6.2	-4.9	-5.2	-5.9	-6.1	-8.1	-5.9	-7.9	-7.8	-6.7	-6.1	-7.7	-7.8	-7.9
YGJ203	-7.2	-7.1	-4.5	-6.6	-4.8	-6.5	-5.1	-5.8	-8	-7.4	-6.1	-7.2	-5.4	34.5	-4.6	-6.3	-6.3	-6	-5.6	-8.1	-5.8	-6.7	-5.3	-5.8	-6.5	-5.2	-6.4	-5	-6.7	-5.5	18	-5.8	-5.3	-8.7	-3.6	27.2	-5	-5.5	-5.8	-5.8	-7.7	-6.2	3.3	-6.9	-6.9	-6.1	1.4	-9.6	-6.6
YGJ205	-8.1	-7.9	-5.1	-8.2	-5.7	-7.6	-6.2	-6.2	-8.9	-6.9	-6.7	-7.9	-6.3	42.3	-5.9	-7.6	-7.7	-7.8	-6.6	-10	-6.8	-8.2	-6.1	-7.1	-6.9	-5.7	-6.4	-6	-7.3	-6.4	28.8	-6.4	-5.9	-9.7	-5.3	26.7	-6	-5.7	-6.8	-6.8	-5	-6.6	2.6	-7.9	-7.4	-7.1	-1.4	-10.2	-7
YGJ215	-5.1	-5.4	-4.2	-6.1	-4.2	-4.7	-4.4	-4.5	-5	-6	-5.4	-5.4	-4.8	-4.9	-4.3	-5.7	-6.1	-6.1	-4.6	-5.8	-4.7	-5.1	-5.6	-5.2	-4.9	-3.8	-5	-4.9	-5.3	-6.3	-6.8	-4.1	-3.6	-5.6	-5.7	-5	-4.1	-4.5	-4.5	-4.2	-5.4	-4.4	-6.5	-5	-5	-4.8	-6.1	-5.8	-4.7
YGJ216	-5.9	-6.3	-4.6	-7.2	-4.7	-5.8	-5.5	-5.1	-6	-7.2	-6.6	-8	-6.2	-4.2	-4.9	-6.9	-8.2	-7.9	-6.1	-7.1	-5.4	-6.4	-5.4	-6	-6.1	-4.7	-6.2	-5.3	-5.8	-7.1	-5.7	-5	-4.3	-7.4	-7.4	-5.9	-4.8	-5.2	-5.6	-5.4	-7.7	-5.7	-7.1	-7.4	-6.3	-5.9	-8.4	-7.4	-7
YGJ230	-8.7	-7.3	-5.3	-8.6	-6.3	-8.3	-4.9	-7.3	-8.4	-8.4	-9	-9.3	-5.9	20.2	-5.2	-8.8	-9	-8.7	-6.8	-8.9	-7.1	-7.9	-6.2	-6.4	-6.9	-7	-6.9	-5.9	-6.7	-10.8	16.1	-6.5	-5.9	-9.3	-7.8	2.8	-6	-6.4	-6.5	-6.3	-9.9	-6.6	-9.2	-8.2	-7.8	-7.4	-10.1	-10.2	-7.1
YGJ235	-8	-7.9	-4.9	-7.8	-5.7	-6.9	-4.6	-6.6	-8.8	-7.7	-6.6	-7.7	-6.5	31.2	-5.2	-8.6	-8.4	-8	-6.5	-8.7	-6.4	-7.6	-5.5	-6.3	-6.8	-5.3	-7	-5.3	-6.3	-7.7	20.6	-6.1	-5.4	-9.7	-8.7	20.7	-5.5	-6	-6.5	-7.5	-9.3	-6.4	-1	-7.6	-7.7	-6.3	-4.3	-9.4	-6.8
YGJ247	-6.9	-6.6	-4.7	-7.4	-5.1	-7	-5.3	-6	-6.7	-7.4	-8.1	-7.9	-7	-0.4	-5.2	-8	-7.8	-7.4	-6.9	-8.3	-6.4	-7.2	-5.5	-6.3	-7.4	-5.2	-6.2	-5.6	-6.7	-7.5	0.1	-5.8	-4.9	-8.2	-8.4	-3.6	-5.5	-5.7	-6	-5.8	-8.8	-6.1	-7.6	-8.4	-6.8	-6.4	-7.3	-8.5	-8.2
YGJ253	-8	-7.9	-4.9	-7.8	-5.8	-7.7	-5.2	-6.8	-8.6	-8.6	-10.4	-9.2	-6.3	13.1	-5.4	-8.4	-8.7	-7.7	-7.1	-9.7	-6.1	-7.8	-6.2	-6.6	-7.1	-6.4	-7	-6.3	-6.8	-10	11.3	-6.2	-5.3	-9.2	-8.6	2	-5.5	-6.6	-6.7	-6.1	-9	-6.2	-8.1	-7.8	-7.6	-5.9	-7.7	-9.4	-6.8
YGJ255	-6.3	-7.2	-4.2	-7.9	-4.3	-7.9	-5	-5.6	-6.9	-8.4	-8.3	-8.9	-5.9	-4.1	-5	-8.4	-8.2	-7.6	-6.9	-8.6	-5.7	-6.8	-5.1	-5.5	-8.2	-4.3	-6.2	-5	-6.5	-8.7	-5.9	-5.7	-4.9	-7.8	-8.6	-9.2	-4.7	-5.9	-6.4	-5.2	-8.2	-5.6	-9	-6.7	-6.7	-5.6	-7.9	-7.3	-7.9
YGJ260	-8	-7.5	-5.2	-9.2	-5.8	-8	-5.1	-6.4	-8.4	-8.7	-8.6	-8.9	-6.4	17.8	-5.3	-8.6	-8.5	-8.1	-6.3	-10.3	-6.9	-7.9	-6.2	-6.1	-8.6	-6	-6.3	-5.4	-6.5	-7	14.7	-6.3	-5.2	-9.5	-8.8	10.1	-5.7	-6.3	-6.8	-6.6	-8	-6.7	-4.8	-8.7	-7.7	-6.7	-9.7	-9.4	-6.2
YGJ275	-4.7	-5.3	-4	-5.8	-4.9	-6.6	-4.3	-4.7	-5.3	-7.1	-5.3	-6.3	-5.3	-6.3	-4	-5.3	-6.4	-5.5	-5.7	-6	-5.3	-5.1	-4.9	-4.6	-5.3	-3.9	-5.4	-4.2	-5	-6.5	-6.9	-4.2	-3.8	-5.6	-5.6	-7.2	-4	-4.1	-5	-4.4	-6.7	-4.9	-7	-5.5	-5.5	-4.8	-6.4	-5.6	-5.6
YGJ281	-5.8	-6.1	-4.5	-6.7	-4.8	-5.5	-5.1	-5	-5.9	-6.2	-6.4	-6.4	-5.2	-2.6	-5	-6.6	-6.8	-6.2	-5.8	-5.9	-5.3	-6.7	-5.1	-5.3	-6.8	-4.5	-6.3	-5.3	-5.9	-5.4	-7.6	-5.6	-4.4	-7	-7.4	-2.4	-4.6	-4.9	-5	-5.2	-7.1	-5.1	-7.4	-6.5	-6.1	-5.9	-6.5	-7	-5.7
YGJ291	-5.1	-6	-3.9	-7.2	-4.5	-5.6	-4.2	-4.3	-5.3	-6.2	-5.8	-6.7	-5.1	-4.9	-4.3	-6.1	-6.9	-5.7	-5.1	-6	-5.2	-5.4	-4.6	-4.9	-5.8	-3.8	-5.1	-4	-5.5	-6.2	-6.9	-4.3	-3.9	-6.1	-6.1	-7	-4	-5	-4.7	-4.5	-6.2	-5.1	-7.3	-5.9	-5.2	-4.7	-6.5	-6	-5.3
YGJ298	-6.8	-7.7	-4.9	-8.2	-5.3	-8	-5.7	-6	-7.8	-8.9	-8	-9.7	-6.6	-4	-5.4	-8.4	-9.4	-7.8	-7.4	-8.4	-6.6	-7.3	-5.8	-6.4	-7.3	-5.7	-7.3	-5.7	-6.8	-9.2	-6.6	-5.4	-5.4	-8.8	-8.5	-7.7	-4.9	-5.9	-6.5	-6.2	-9	-6.3	-8.5	-7.5	-6.8	-6	-8.5	-9.3	-7.2
YGJ303	-7.3	-8.5	-5.2	-8.7	-5.4	-7.9	-5.9	-6.3	-8.2	-10.4	-9.1	-10.3	-6.7	10.1	-5.3	-8.8	-9.6	-8.1	-7.2	-9.1	-6.6	-6.9	-6.5	-6.9	-7.1	-5.5	-7.1	-5.6	-7	-10.3	5.7	-6.4	-6.1	-9.1	-7.9	-3.2	-5.6	-6.2	-6.3	-6.1	-9.2	-6.6	-8	-8.2	-7.2	-6.5	-9.5	-9.4	-7.4
YGJ320	-8.4	-8.3	-5.1	-7.6	-5.4	-7.3	-5.5	-6.2	-8.5	-8.6	-6.5	-8.8	-6.2	40	-5.2	-8.9	-9.5	-7.8	-7.6	-9.9	-7	-7.3	-6.2	-6.5	-7.5	-5.7	-6.6	-6	-7	-7.8	23.7	-6.8	-5.2	-9.7	-6.3	16.8	-5.7	-6.3	-6.3	-7.2	-8.2	-6.7	-3.9	-7.9	-7.6	-5.9	-2.7	-9.3	-6.1
YGJ322	-5.6	-5.8	-4.2	-6.4	-4.2	-6.6	-4.3	-4.5	-5.2	-7.2	-6.6	-6.8	-5	-6.6	-4.5	-6.3	-6.4	-6.1	-5.5	-6.7	-5.1	-5.9	-5.3	-4.6	-6.2	-3.9	-5.8	-4.5	-5.5	-6.7	-6.9	-4.5	-4.1	-6.7	-6	-7.8	-4.1	-4.8	-4.5	-4.5	-7.1	-4.7	-7	-5.7	-5.6	-5.4	-6.6	-6.4	-6.3
YGJ324	-4.8	-5.6	-3.9	-6.3	-4.4	-5.8	-4.4	-4.9	-5.5	-6.7	-5.9	-6.2	-4.6	-5.4	-3.9	-5.6	-6.6	-5.8	-5.2	-6.3	-4.9	-4.8	-4	-4.7	-5.2	-3.9	-6.2	-4.5	-5.4	-6.3	-7.1	-4.2	-3.8	-5.7	-5.7	-6.8	-4.1	-4.4	-4.3	-4.3	-6.4	-4.7	-6.4	-5.1	-5	-4.6	-6.4	-5.7	-4.7
YGJ328	-5.2	-5.8	-4.3	-6	-4.4	-6.3	-4.9	-4.3	-5.1	-7.3	-5.4	-6.3	-5.2	-6.3	-4.2	-6	-6.2	-5.5	-5.4	-6	-5.2	-5.5	-5.2	-4.7	-5.4	-4	-5.4	-4.6	-5.1	-6.3	-6.8	-4.3	-3.8	-5.9	-5.9	-7.4	-4	-4.7	-4.9	-4.5	-6.6	-4.8	-7.1	-5.4	-6	-5.1	-6.1	-6	-5.6
YGJ333	-4.6	-5.1	-3.1	-5.6	-3.6	-5.9	-3.7	-4.6	-5.1	-6.5	-5.9	-5.9	-4.1	-6.4	-3.3	-5.1	-5.9	-5.1	-4.8	-5.8	-4.7	-4.2	-4.1	-3.8	-4.9	-3.5	-5	-3.3	-5.3	-6.2	-7	-3.8	-3.7	-4.9	-5.2	-7.6	-3.2	-3.7	-4.3	-3.2	-5.8	-4.2	-6.6	-4.1	-4.7	-3.9	-6.1	-5.4	-5
YGJ338	-4.9	-5.1	-3.1	-5.6	-4.3	-5.3	-4.5	-3.5	-4.3	-6.6	-5.1	-6.2	-5.2	-6.2	-4.2	-5.7	-5.8	-5.1	-5.9	-5.9	-4.3	-5.6	-4.7	-4.6	-5.1	-4.1	-4.7	-4.7	-5.3	-5.8	-5.6	-3.6	-3.8	-5.7	-5.8	-6.5	-3.9	-4.4	-4.4	-4.6	-5.6	-4.3	-5.9	-5.6	-5	-4.6	-5.3	-4.9	-5.6
YGJ341	-7.4	-7.4	-5	-8.9	-5.6	-6.9	-5.7	-6	-7.5	-8.5	-8.8	-9.6	-6.7	1.8	-4.8	-7.8	-8.8	-7.5	-6.2	-8.2	-6.8	-7.6	-5.8	-6.7	-6.7	-5.6	-7.1	-6	-5.9	-7.8	1.3	-6.1	-6	-9.5	-7.4	-7.1	-5.3	-6	-6.4	-6	-8.9	-6.7	-8.7	-7	-6.7	-6.6	-8.6	-8.6	-7.8
YGJ351	-5.1	-5.5	-3.7	-6.2	-4.2	-5.3	-4.7	-4.2	-5	-5.4	-5.5	-6.9	-5.1	-3.8	-4.1	-6.5	-6.9	-6.1	-4.9	-6.1	-5.1	-5.8	-4.6	-4.4	-5.2	-3.9	-4.8	-4.4	-5.9	-6.4	-5.9	-4.5	-3.8	-6.3	-6.4	-5.9	-4.4	-4.3	-4.9	-4.5	-6.3	-4.9	-6.5	-6.1	-5.5	-5.2	-6.6	-6.1	-6
YGJ354	-5	-5.1	-3.6	-6	-4.8	-5.8	-4.3	-5.2	-5.6	-6.8	-6	-6.6	-5.5	-6.8	-3.9	-6	-6.3	-5.3	-5.4	-6.4	-5.3	-5.2	-5.3	-4.4	-5.9	-3.7	-5.5	-4.4	-5.7	-6.5	-7.4	-4.3	-4	-5.8	-5.7	-8.2	-4.2	-4.2	-5	-4	-6.5	-5	-7.1	-5.8	-5.2	-4.7	-6.3	-6.6	-6.2
YGJ356	-7.5	-7.2	-4.2	-7.3	-5.1	-6.3	-5.4	-5.4	-7.7	-7.4	-7.1	-8.1	-6.3	37.6	-4.9	-7.5	-7.1	-6.4	-7.2	-8.8	-6.8	-7.2	-5.7	-6.3	-6.7	-5.2	-6.8	-5.4	-6.2	-5.7	24.5	-5.9	-4.9	-9	-5.4	14.6	-5	-5.6	-6	-5.8	-6.7	-6.4	4.7	-7.3	-6.7	-6.2	-4.1	-10.7	-6.4
YGJ358	-7.5	-7	-5	-7.8	-5.2	-8	-5.8	-5.9	-7.1	-9.9	-9.2	-9.9	-6.8	-5.6	-5.2	-8.1	-9.9	-7.6	-6.8	-8.7	-6.4	-7.5	-5.3	-6.2	-7.2	-5.4	-7.3	-5.7	-6.7	-9.8	-5.5	-6.1	-5.4	-8.3	-8.4	-12	-4.8	-5.6	-6.4	-5.7	-8.9	-6	-10.2	-7.7	-7.6	-6.5	-9.6	-8.3	-7.8
YGJ361	-3.8	-3.9	-2.9	-4.1	-3	-4	-3.5	-3	-3.1	-4.3	-3.7	-4.1	-4.2	-4.7	-3.1	-4.2	-3.9	-3.9	-4.2	-4.4	-3.7	-4.5	-4	-3.8	-4.4	-2.9	-3.6	-3.8	-3.7	-4.3	-4.2	-3.2	-2.6	-4.4	-4.3	-4.7	-2.9	-3.7	-3.7	-3.7	-4.2	-3.2	-4.3	-4.7	-4.6	-3.8	-3.9	-4.2	-4.9
YGJ363	-4.8	-5.6	-3.8	-6	-3.9	-5.3	-4.6	-4.1	-5.2	-6	-5.6	-6.6	-5.3	-5.4	-4.4	-6	-6.1	-5.5	-6.1	-5.9	-4.8	-5.8	-4.8	-5.3	-5.4	-4.2	-4.9	-4.6	-5.2	-5.9	-6.4	-4.3	-4	-5.8	-5.7	-6.9	-4.2	-4.4	-4.7	-4.6	-6.1	-4.6	-6.2	-5.8	-5.4	-4.8	-6.1	-5.8	-6.1
YGJ369	-4.9	-3.9	-3.6	-4.6	-4.6	-4.8	-4.5	-3.4	-3.8	-5.2	-4.4	-4.8	-4.8	-5.2	-4	-4.7	-4.7	-4.5	-5.1	-4.8	-4.1	-4.8	-4.8	-4.4	-4.9	-3.3	-3.5	-4.3	-4.1	-4.7	-4.3	-4.1	-3.1	-5	-5.2	-4.9	-3.4	-4.4	-4.3	-4.4	-5	-3.9	-4.7	-5.7	-5.5	-4.5	-4	-4.8	-6.1
YGJ373	-8.5	-7.5	-4.7	-6.9	-5.3	-6.5	-5.5	-6.7	-7.7	-7.6	-8.9	-6.5	-6.3	13.9	-5.4	-7.9	-7	-7	-6.6	-7.7	-6.3	-7.3	-5.5	-6.7	-6.6	-5.7	-8.3	-6	-6.7	-6.1	-4.3	-5.7	-5.1	-8.7	-6.6	3	-5.4	-5.6	-6	-6.1	-9.7	-7.1	-6.3	-7	-6.9	-6.5	-7.1	-9.5	-6.4
YGJ377	-7.9	-8	-5.5	-7.8	-5.4	-7.8	-5	-6.1	-8.6	-9	-6.7	-8.6	-6.8	36.1	-5.1	-8.3	-8.9	-6.9	-7.4	-9.8	-7	-8.2	-6.3	-6.4	-7.1	-5.8	-7	-6.1	-6.6	-6.5	22.8	-6.1	-6	-9.7	-5.3	16.4	-5.6	-6	-6	-6.3	-8.7	-7.1	-0.9	-8	-7.6	-6.4	-6.9	-11.7	-7.1
YGJ384	-5.9	-5	-3.4	-5.9	-3.9	-5.7	-4.9	-4.2	-4.4	-5.5	-5.3	-6.2	-5.3	-5.8	-4.3	-5.9	-6.1	-5.7	-6.1	-6.2	-4.5	-6	-4.8	-4.7	-5.9	-3.8	-4.4	-4.4	-5.5	-6.3	-6	-4.3	-3.7	-5.7	-6.2	-6.9	-4	-4.5	-5	-4.7	-5.9	-4.7	-6.3	-6.2	-6	-5.4	-5.8	-5.6	-7
YGJ386	-9.3	-7.5	-5.5	-9.2	-5.8	-8.1	-5.7	-7.3	-8.8	-9	-7.8	-10.1	-7.2	13.6	-5.2	-9.7	-9.2	-9	-7.8	-9.1	-7.1	-8.1	-6.4	-6.8	-6.8	-5.9	-7.7	-5.6	-7.5	-7.7	10.9	-6.8	-5.5	-10.4	-8.8	3.7	-5.9	-6.7	-6.8	-6.2	-10.2	-6.3	-9.6	-7.9	-7.5	-6.4	-8.2	-10	-7.3
YGJ395	-3.4	-3.5	-3.3	-4.1	-3.6	-4.2	-4.3	-3.1	-3.4	-4.2	-3.8	-4.5	-4.6	-4.8	-3.6	-4.6	-4.2	-4	-4.6	-4.8	-3.8	-5.1	-4.5	-4	-4.9	-3.2	-3	-4.4	-3.9	-4	-3.9	-3.5	-2.8	-4.7	-4.9	-4.8	-3.2	-4.1	-4.1	-4.5	-4.5	-3.7	-4.1	-4.9	-5.2	-4.5	-3.9	-4.5	-5.7
YGJ396	-6.3	-7.2	-4.1	-6.2	-5	-6.4	-5.8	-5.2	-6.2	-6.9	-6.9	-8.1	-6.3	6.2	-5.1	-7	-7.5	-7.4	-6.3	-7.2	-5.5	-7.6	-5.3	-5.5	-6.3	-4.7	-5.5	-5.1	-5.7	-7	-0.5	-4.8	-4.2	-7.9	-7	-0.1	-4.7	-4.8	-5.6	-5.8	-8.6	-5.5	-8	-7.1	-6.4	-5.9	-7.2	-8.4	-6.1
YGJ399	-5	-5.7	-3.7	-6.8	-4.2	-5.6	-4.7	-4.4	-5.3	-6	-5.3	-6.5	-5	-5.2	-4.2	-5.9	-6.4	-6	-5	-6	-5	-5.4	-5.2	-4.9	-5.5	-3.7	-4.8	-4.4	-5	-5.6	-6.8	-4.1	-3.8	-5.9	-5.8	-6.5	-4	-4.7	-4.9	-4.4	-6.4	-4.8	-6.7	-5.4	-5.7	-4.7	-6.2	-6.1	-5.2
YGJ403	-4.5	-5.2	-3.5	-5.5	-3.6	-5.3	-3.5	-3.8	-4.6	-5.5	-5	-5.6	-4	-5.5	-3.4	-5.2	-5	-5	-4.6	-5.5	-3.9	-4.7	-3.4	-3.9	-5	-3.2	-4.9	-3.3	-4.7	-5.5	-6	-4.1	-3.5	-5.3	-5.1	-6.6	-3.1	-3.8	-3.8	-3.7	-5.5	-4.1	-6.2	-4.6	-4.2	-4	-5.3	-5.5	-5.3
YGJ405	-3.8	-4.8	-3.3	-5.3	-3.7	-5.6	-3.5	-4.1	-4.9	-5.9	-5.1	-5.4	-3.7	-5.7	-2.9	-4.2	-5.2	-4.8	-4.3	-5.2	-4.4	-3.9	-3.7	-3.5	-4.6	-3.4	-5.4	-3.3	-4.8	-5.4	-6.2	-3.4	-3.2	-5	-4.2	-6.8	-2.9	-3.5	-4	-3	-5.8	-3.9	-6.2	-3.9	-4.4	-3.9	-5.4	-5.3	-4
YGJ411	-6.1	-6.3	-4.6	-6.5	-5.1	-5.7	-5	-5	-5.7	-6.4	-6.2	-6	-5.6	-4.2	-4.9	-6.7	-6.4	-6.6	-5.6	-6.2	-6.4	-6.4	-5.3	-5.5	-6.4	-4.3	-6	-5.3	-5.8	-5.9	-8.1	-4.8	-4.3	-7	-7	-3.7	-4.5	-5	-5.1	-5.3	-7	-5.7	-7.7	-6.5	-6.9	-6.1	-6.5	-7.1	-5.8
YGJ414	-7.1	-7.3	-5	-8.1	-5.5	-7.5	-5	-6.8	-7.9	-8	-8.3	-8	-6.3	14.2	-5	-7.6	-8.4	-8	-6.4	-9.1	-7.2	-7.3	-6.1	-6.2	-6.7	-5.4	-6.7	-5.6	-6.5	-7.3	11.2	-5.6	-5.5	-8.7	-8.2	1	-5.2	-6.2	-6.5	-6.7	-9.2	-6.2	-6.7	-7.7	-7.8	-6.6	-8.7	-9.2	-7
YGJ415	-6.3	-6.7	-4.6	-7.3	-4.7	-7.1	-5.3	-5.6	-6.7	-8.4	-7.9	-8.1	-5.8	-7.3	-4.5	-7.3	-7.8	-7	-6.5	-7.6	-5.7	-6.3	-5.2	-5.4	-6.9	-4.9	-6.9	-5.1	-7.1	-8	-8.2	-5.2	-5.2	-7.1	-7.1	-9.8	-4.8	-5.2	-5.6	-4.5	-7.9	-5.3	-8.4	-6.8	-6	-5.7	-8.2	-7.4	-6.5
YGJ416	-4	-4.7	-3.2	-5	-3.7	-5.1	-3.6	-3.7	-4.8	-5.7	-4.7	-5.2	-3.6	-5	-3	-4.3	-5.3	-4.5	-4.2	-4.9	-4.1	-3.7	-4	-3.5	-4.6	-3.6	-4.9	-3.5	-4.6	-5.3	-5.7	-3.2	-3.1	-4.8	-4.3	-6.1	-3.3	-3.5	-4.1	-3.2	-5.9	-3.8	-5.6	-3.8	-4	-3.4	-5.2	-5.3	-3.5
YGJ431	-5.3	-5.7	-4.1	-6.5	-4.6	-5.8	-5.4	-4.6	-5.1	-6.3	-6.2	-7.1	-6.6	-7.5	-4.4	-6.6	-6.7	-6.7	-6.5	-7.1	-5.4	-7	-5.4	-5.4	-6	-4.6	-4.7	-5.2	-6	-7.3	-6.1	-5	-4	-6.7	-6.8	-7.5	-4.4	-5.1	-5.1	-5.4	-7.2	-5	-7.5	-6.9	-6.4	-5.9	-6.8	-6.5	-6.6
YGJ440	-5	-5.4	-3.7	-5.8	-4.6	-4.8	-4.8	-4	-5	-6	-5.5	-6	-5.4	-5.1	-4.4	-6	-6.2	-5.4	-6.2	-6	-5.1	-5.5	-4.8	-4.9	-5.5	-4.2	-5	-4.7	-5.3	-5.7	-6.9	-4.2	-3.7	-5.6	-6.1	-6.5	-4.1	-4.5	-4.9	-4.4	-6	-4.6	-6.5	-5.5	-5	-5.5	-6.1	-5.7	-5.9
YGJ448	-3.4	-3.9	-3.1	-4.4	-3.5	-4.2	-3.7	-3.4	-3.5	-4.5	-3.8	-4.4	-4.5	-5.1	-4	-4.3	-4.1	-4.2	-4.5	-4.5	-3.8	-4.4	-4.5	-4	-4.6	-3.1	-3.4	-4.4	-3.7	-4.2	-4.1	-3.8	-2.8	-5.2	-4.7	-4.7	-3.1	-4.2	-4.6	-4.5	-4.4	-3.4	-4.3	-5	-4.8	-4.4	-3.7	-4.5	-5.7
YGJ453	-4.1	-4.3	-3.3	-5.1	-3.8	-4.7	-4.8	-3.6	-3.9	-4.9	-4.5	-5.8	-5.1	-5.2	-3.9	-5.5	-5.5	-5	-5.4	-5.3	-4.1	-5.5	-5.1	-4.4	-5.6	-3.4	-3.6	-4.3	-4.9	-5.1	-4.8	-4.2	-3.4	-5.3	-6	-5.4	-3.5	-4.2	-4.3	-4.5	-5.2	-4.2	-5.2	-6.1	-5.5	-4.9	-4.6	-5.2	-6.1
YGJ459	-6.2	-6.5	-4.5	-8.1	-4.8	-6.4	-4.3	-5.3	-7.4	-8.1	-7.2	-8.4	-5.4	-4.1	-4.6	-6.7	-8.2	-6.8	-5.7	-7.1	-5.4	-5.6	-4.8	-5.4	-6	-4.6	-6.9	-5.1	-6.3	-8.2	-9.4	-4.5	-4.7	-6.8	-6.5	-8.4	-4.6	-5.4	-5.4	-4.6	-7.6	-5.6	-8.1	-5.8	-5.8	-5	-8.6	-7.2	-5.4
YGJ460	-5.9	-7.1	-4.5	-7.8	-4.3	-5.3	-4.2	-4.8	-6.9	-5.9	-6.6	-8.5	-5.2	-3.9	-4.3	-7.1	-7.6	-6.9	-5.4	-7	-5.1	-5.6	-4.7	-5.4	-5.4	-4.4	-6.1	-5.1	-5.7	-6.7	-9.3	-4.4	-4.3	-6.6	-7.1	-6.5	-4.7	-4.6	-4.7	-4.7	-7.2	-5.5	-7	-5.1	-5.4	-5.3	-8.2	-7.1	-5.5
YGJ464	-6.7	-6.7	-4.6	-7.9	-5.3	-7.1	-5.7	-6.4	-6.6	-8.9	-8	-9	-7	-7	-5.3	-8.4	-8.8	-7.1	-7.9	-8.6	-6.6	-7.1	-5.6	-6.3	-7.6	-4.8	-6.5	-5.4	-6.1	-9.2	-0.2	-5.6	-5	-8.8	-8.5	-9.7	-5.2	-5.9	-6.2	-6.4	-9.3	-6.1	-9.9	-8.2	-6.8	-6.4	-8	-8	-9
YGJ465	-4.8	-5.1	-4.1	-5.6	-4.2	-6.1	-4.9	-4	-4.6	-6.3	-5.5	-6.1	-4.9	-5.9	-4.4	-5.6	-5.8	-5.6	-5.5	-6.1	-4.7	-5.5	-5.8	-4.7	-6	-4	-4.6	-4.8	-5.2	-6.1	-6	-4.4	-3.8	-6	-5.7	-6.9	-3.9	-4.8	-4.6	-4.7	-6.1	-4.5	-6.3	-6.1	-5.7	-5	-5.8	-5.6	-6.1
YGJ466	-4.9	-5.1	-3.7	-5.7	-4.1	-5.4	-4.8	-3.9	-4.6	-6.6	-5.5	-6	-4.9	-6.2	-4.3	-5.4	-6	-5.4	-5.5	-5.9	-4.7	-5.5	-5.4	-4.8	-6.1	-3.7	-4.9	-4.7	-5	-6.3	-6	-4.1	-3.9	-5.5	-5.9	-7.1	-3.9	-4.9	-4.6	-4.6	-6.1	-4.5	-6.3	-6	-5.9	-4.8	-5.8	-5.8	-6
YGJ467	-4.9	-5.3	-4	-6.1	-4	-6.3	-4	-4.4	-5.6	-7.3	-5.9	-6.4	-4.6	-5.7	-3.8	-5.3	-6.4	-5.6	-4.7	-5.8	-4.7	-4.4	-4.6	-4.4	-5.9	-3.9	-5.6	-4.5	-5.2	-6.7	-7.4	-4.1	-3.7	-6	-5.1	-8.1	-3.5	-4.3	-4.3	-3.6	-7.1	-4.4	-7.3	-4.9	-5.2	-4.3	-6.5	-6	-4.2
YGJ468	-4.3	-4.6	-3.4	-4.7	-3.6	-5.1	-2.9	-3.8	-4.7	-5.6	-4.7	-5.1	-4	-5.1	-3.2	-4.7	-5	-4.6	-4.2	-4.8	-4.1	-4	-3.6	-3.4	-4.4	-3.1	-5.1	-3.3	-4.9	-5.3	-5.9	-3.3	-3	-4.8	-4.4	-6.3	-2.9	-3.5	-4.1	-3.1	-5.7	-4	-6	-4	-4.5	-3.7	-5.1	-4.7	-4.3
YGJ470	-6.6	-6.8	-4.5	-7.9	-4.3	-5.5	-4.7	-5.2	-6.8	-6.4	-6.9	-6.7	-5.4	-0.3	-4.4	-6.2	-7.3	-6.9	-4.8	-6.7	-5.2	-5.9	-4.5	-5.2	-5.5	-4.4	-6.2	-5.3	-7.1	-6.1	-10.3	-4.1	-4.2	-6.5	-6.1	-5	-4.4	-5.2	-4.8	-4.5	-7.1	-5.3	-6.4	-5.6	-5	-5.3	-8	-7.4	-5.5
YGJ471	-4.4	-4.9	-3.7	-5.4	-3.9	-5.8	-3.3	-4.2	-5.3	-6.6	-5.3	-5.7	-4.2	-5.8	-3.2	-4.7	-5.8	-4.9	-4.7	-5.3	-5.1	-4	-3.5	-4	-4.8	-3.7	-5.3	-4	-5.2	-5.4	-6.3	-3.6	-3.3	-5.3	-4.6	-6.9	-3.2	-4.1	-4.7	-3.3	-6.3	-4.1	-6.6	-4.2	-4.6	-3.9	-5.7	-5.5	-4.4
YGJ472	-5.2	-5.9	-4	-6.2	-4.6	-6.9	-4.3	-4.4	-5.3	-7.2	-6.1	-6.4	-5.2	-6.3	-4.1	-5.6	-6.4	-5.7	-5.2	-6.3	-5.3	-5.3	-4.6	-4.4	-6.2	-3.9	-5.9	-4.1	-6.2	-6.9	-7	-4.5	-4.1	-6.1	-5.8	-8.2	-4	-4.6	-4.8	-4.2	-7	-4.7	-7.3	-5.7	-5.3	-4.8	-6.4	-6.5	-5.4
YGJ473	-4.6	-5	-3.9	-5.5	-4.2	-6.1	-3.9	-4.4	-5.3	-6.8	-5.5	-6	-4.2	-6	-3.5	-5.1	-5.8	-4.8	-4.9	-5.6	-5	-4	-4.2	-3.8	-5.1	-4	-5.3	-4	-5.4	-5.9	-6.8	-3.8	-3.8	-5.6	-4.6	-7.2	-3.3	-3.9	-4.8	-3.3	-6.2	-4.2	-6.6	-4.4	-4.9	-4.4	-6.2	-5.7	-4.4
YGJ474	-4.9	-5.3	-4	-6.1	-4	-6.3	-4	-4.5	-5.6	-7.3	-5.9	-6.4	-4.7	-5.6	-3.8	-5.3	-6.3	-5.6	-4.7	-5.8	-4.8	-4.4	-4	-4.4	-5.9	-3.9	-5.6	-4.4	-5.3	-6.7	-7.4	-4.1	-3.7	-6	-5.1	-8.1	-3.6	-4.3	-4.3	-3.5	-7.2	-4.4	-7.3	-4.9	-5.3	-4.3	-6.5	-6	-4.4
YGJ475	-4.9	-5.5	-4	-6.1	-4.4	-5.6	-4.1	-4.3	-5.4	-7	-5.7	-6.7	-4.7	-5.3	-4.1	-5.9	-6.3	-5.8	-5.4	-5.8	-5.1	-4.9	-5.1	-4.8	-5.4	-4	-5.1	-4.6	-5.5	-6.6	-7.4	-4.2	-3.9	-5.6	-5.6	-7.6	-3.7	-4.8	-4.5	-4.2	-6.1	-4.3	-7.4	-5.4	-5.2	-4.7	-6	-5.7	-4.8
YGJ476	-4.5	-5.1	-3.7	-6.3	-3.6	-5.4	-3.9	-4.8	-5.3	-5.7	-5.5	-5.9	-4.1	-4	-3.8	-5	-6.4	-5.3	-4.5	-5.3	-4.2	-4.3	-4.7	-4.3	-4.9	-3.8	-5.4	-4.4	-5	-6.1	-7	-3.4	-3.5	-5.1	-4.8	-5.5	-3.6	-3.9	-4.1	-3.7	-5.3	-4.5	-6.3	-4.2	-4.4	-4.2	-6.3	-5.6	-4.1
YGJ477	-4.6	-5.2	-3.6	-6.4	-4	-4.4	-3.7	-4.8	-5	-5.2	-5.3	-4.9	-4	-4.5	-3.8	-5.2	-5.9	-5.5	-4.1	-5	-4.3	-4.8	-5.2	-5	-4.7	-3.5	-5.1	-4.5	-4.6	-5.6	-7	-3.9	-3.5	-5	-5.2	-3.5	-3.7	-4.4	-4	-4.1	-5.5	-4.2	-6	-4.6	-4.6	-4.6	-5.9	-5.6	-4.2
YGJ479	-5.3	-5.5	-4.1	-6.2	-4.7	-6	-4.5	-4.2	-5.5	-7	-6.1	-6.6	-4.9	-6.6	-4.1	-6.1	-6.6	-5.8	-5.6	-6	-5.1	-5.5	-4.2	-4.4	-5.8	-3.9	-5.8	-4.1	-6.2	-6.5	-7.4	-4.4	-4.2	-6.3	-5.9	-8.4	-3.9	-4.6	-4.8	-4.3	-7.3	-4.7	-7.4	-5.5	-5.7	-4.9	-6.6	-6.1	-5.7
YGJ481	-4.7	-5.9	-3.9	-6.4	-3.7	-4.9	-4.5	-4.5	-5.6	-6.4	-5.7	-6.1	-4.5	-4.3	-4	-5.3	-6.3	-5.6	-4.8	-5.7	-4.7	-4.5	-5.2	-4.1	-4.9	-3.8	-6.2	-4.8	-5.4	-6.9	-7.7	-3.8	-3.6	-5.6	-5.2	-5.9	-3.7	-4.4	-4.2	-3.8	-5.9	-4.6	-6.7	-4.4	-4.4	-4.4	-6.5	-5.9	-4.3
YGJ483	-3.7	-4	-3.3	-4.3	-3.7	-4.6	-3.7	-3.5	-3.9	-4.4	-4.3	-4.4	-4.4	-4.8	-4	-4.4	-4.3	-4	-4.4	-4.6	-3.7	-4.5	-4.6	-4.7	-5.1	-3.3	-3.8	-3.7	-4	-4.8	-4.1	-3.8	-3	-5.3	-4.6	-4.6	-3.3	-4.2	-4	-3.8	-4.8	-3.6	-4.3	-4.6	-4.7	-3.9	-4	-4.6	-5.4
YGJ484	-5.8	-5.7	-4	-6.4	-4.4	-5.9	-4.4	-4.6	-5.6	-7.4	-6.4	-7.3	-5.9	-0.5	-4.4	-7.2	-7.3	-6.4	-6	-7	-5.6	-6.5	-5.1	-5.7	-6.1	-4.5	-5.5	-5.3	-5.4	-6.9	-0.5	-4.9	-4.2	-7	-7.5	-5.5	-4.3	-4.9	-4.8	-5.1	-8	-5.1	-8	-5.9	-5.6	-6.5	-7	-7.5	-5.7
YGJ485	-8.1	-8.1	-5.4	-8.2	-6	-7	-4.8	-6.8	-8.9	-8.5	-8.3	-9.9	-6.4	18.6	-5.3	-8.5	-9.1	-7.8	-6.1	-10.3	-6.7	-8.3	-6.5	-6.4	-7.4	-5.8	-7.3	-6.2	-6	-8.7	25	-6.4	-5.5	-9.4	-7.2	4.4	-5.6	-6	-7	-6.2	-9.2	-7.4	-1.6	-7.1	-7.4	-6.2	-7.1	-9.7	-6.1
YGJ486	-5.9	-8.3	-5	-8.3	-6.1	-7.3	-4.9	-5.9	-8.3	-8.8	-10	-9.7	-5.8	27.5	-4.8	-8.6	-9	-7.7	-5.8	-9.6	-7.3	-7.1	-5.6	-6.3	-7.1	-5.8	-6.5	-5	-6.1	-8.4	20.3	-6.7	-5.1	-8.8	-6.9	17	-5.5	-5.4	-6.4	-5.4	-7.8	-6	-7.7	-6.8	-7.8	-5.8	-6.9	-8.5	-4.4
YGJ488	-4	-4.1	-3.1	-4.7	-3.6	-4.8	-4.2	-3.3	-3.8	-5.1	-4.9	-5.1	-5.4	-5.8	-3.9	-5.2	-5	-4.6	-5.4	-4.9	-4.2	-5.2	-4.6	-4.4	-5.4	-3.4	-3.5	-4.2	-4.3	-4.9	-4.8	-4.3	-3.3	-5.3	-5.4	-5.1	-3.2	-4.2	-4.4	-4.5	-5	-3.9	-4.8	-5.6	-5.3	-5.4	-4.2	-4.8	-6.8
YGJ489	-3.7	-3.6	-3.2	-3.6	-3.3	-4	-3.3	-3.3	-3.1	-3.9	-3.7	-3.9	-4	-4.6	-3.5	-4	-3.9	-3.6	-3.9	-4.3	-3.7	-4	-4.3	-3.9	-4.6	-2.9	-3.5	-3.6	-3.7	-4.4	-3.6	-3.2	-2.9	-4.9	-4	-4.2	-2.8	-3.9	-3.7	-3.3	-4.5	-3.1	-3.9	-4.1	-4.5	-3.4	-3.6	-4.1	-4.2
YGJ490	-5.6	-6	-4.1	-6	-4.2	-5.9	-5.2	-4.4	-5.1	-6.9	-6.2	-6.4	-5	-6.1	-4.5	-6	-6.3	-5.9	-5.9	-6.2	-5.3	-5.6	-4.4	-4.7	-5.5	-4.2	-6	-5.2	-5.5	-6.4	-6.9	-4.4	-4	-5.9	-6.1	-7.9	-4	-4.5	-5	-5.1	-6.2	-4.9	-7.2	-5.7	-5.6	-5	-6.1	-6.3	-6.1
YGJ491	-2.9	-3.1	-2.4	-3.5	-2.8	-3.2	-2.9	-2.4	-2.7	-3.8	-3.1	-3.5	-3.4	-3.8	-2.7	-3.4	-3.3	-3.3	-3.2	-3.3	-3.1	-3.5	-3.5	-2.8	-3.8	-2.3	-2.5	-2.9	-3.1	-3.7	-3.4	-2.7	-2.3	-3.4	-3.7	-3.6	-2.5	-3	-2.9	-2.9	-3.6	-2.8	-3.6	-3.3	-3.4	-3.3	-3.2	-3.4	-3.5
YGJ495	-4.9	-4.5	-3.6	-4.9	-3.7	-5.4	-4.1	-3.5	-4	-5.5	-4.7	-5.1	-4.5	-5.4	-3.9	-5.1	-5	-4.6	-4.8	-5.1	-4.5	-4.8	-4.9	-4	-5.7	-3.4	-4.4	-4.3	-4.7	-5.2	-5.3	-4	-3.5	-5.5	-5	-6.1	-3.4	-4.6	-4.3	-4.1	-5.4	-3.9	-5.3	-5.3	-4.9	-4.3	-5	-5	-5.8
YGJ496	-3.3	-3.4	-2.5	-3.8	-2.5	-2.9	-3.2	-2.9	-3.3	-3.8	-3.5	-3.9	-3.4	-4	-3.2	-4.1	-3.6	-3.5	-3.7	-3.7	-3.3	-4.2	-3.5	-3.1	-4.2	-2.4	-2.9	-3.2	-3.1	-3.9	-3.8	-3.1	-2.5	-3.8	-3.9	-3.8	-2.6	-3.2	-2.9	-3.1	-3.8	-2.8	-3.7	-3.8	-3.9	-3.4	-3.5	-3.7	-3.8
YGJ500	-6.4	-6.5	-4.7	-8.6	-5	-7.5	-5.4	-5.6	-6.9	-9.5	-8.3	-9.8	-6.3	-1.7	-5.1	-7.5	-8.7	-7.6	-7	-8.9	-5.9	-6.9	-6	-5.8	-7.1	-5.1	-6.7	-5.6	-7	-9.5	-4.3	-5.9	-5.2	-8.5	-7.5	-11.9	-5.3	-5.8	-5.7	-5.7	-9.2	-6.1	-10.2	-7.6	-7.1	-6.9	-8.5	-7.9	-7.2
YGJ501	-5.1	-6.1	-4.3	-6.4	-4	-6.5	-4.5	-4.4	-5.5	-6.5	-5.9	-6.7	-4.5	-6.2	-4.3	-5.8	-6.4	-5.8	-5.3	-6.3	-4.7	-4.8	-5.4	-4.5	-5.3	-3.8	-5.8	-4.5	-5.4	-7	-7.9	-4.3	-3.8	-5.7	-5.7	-7.7	-3.9	-4.6	-4.8	-4.1	-6	-4.7	-6.9	-5.4	-5	-4.8	-7	-6.2	-4.8
YGJ502	-5	-6	-3.6	-5.9	-3.9	-6.3	-2.7	-5.2	-5.5	-7.1	-6.6	-6.9	-3.9	-6.2	-3.5	-5.6	-6.2	-5.6	-5.1	-6.6	-4.4	-4.3	-3.8	-4.4	-4.8	-3.8	-5.8	-3.9	-5.2	-6.6	-7.8	-4	-3.3	-4.9	-5.9	-8.6	-3.4	-4	-5.2	-3.4	-6.5	-4.6	-7.7	-3.7	-5.4	-5	-6.6	-6.4	-4.2
YGJ503	-4.8	-5.3	-3.9	-6.5	-4	-4.2	-3.9	-4.6	-5.2	-5.8	-5.7	-5.9	-4.4	-4.9	-3.7	-5.3	-6.6	-5.7	-4.3	-5.2	-4.3	-4.4	-5.4	-4.5	-4.2	-3.8	-5.6	-5	-5.2	-6.6	-7.4	-3.6	-3.4	-5.2	-5	-6	-3.9	-4.3	-3.7	-3.7	-5.8	-4.4	-6.5	-4.3	-4.4	-4.4	-6.7	-6	-4.3
YGJ507	-6.6	-7.1	-4.9	-8.7	-5.3	-7.2	-5.2	-5.9	-7.5	-10.8	-8.8	-9.8	-6.5	-0.4	-4.9	-7.2	-9.2	-8.1	-7	-8.2	-6.2	-7.2	-5.7	-6.3	-6.6	-5.1	-7	-5.7	-5.8	-8.6	0.2	-6.3	-5.6	-8.7	-7.7	-11	-4.9	-5.9	-6.1	-5.8	-10.1	-6.3	-8.9	-7.4	-7.1	-5.9	-9.3	-8.5	-7.5
YGJ509	-7	-6.6	-4	-6.5	-4.8	-6.9	-5.1	-5.1	-6.7	-7.6	-6.6	-7.7	-5.6	22.9	-4.3	-7.6	-7.5	-6.7	-6.1	-8.1	-5.6	-6.6	-5.7	-5.6	-6.4	-5.3	-6.5	-5.4	-6.2	-6.1	12.5	-5.5	-4.9	-8.2	-5.2	12.8	-4.6	-5.5	-5.2	-6	-8.3	-6.3	-1.8	-6.9	-6.6	-5.3	-3.5	-9.7	-5.9
YGJ510	-9.2	-8.4	-5.4	-10.1	-6	-7.7	-5.4	-6.7	-9	-10.1	-9.8	-9.9	-6.8	25.6	-5	-9.8	-9.4	-9.1	-6.7	-10.4	-7.3	-8.7	-6	-6.8	-7.4	-6.2	-8.1	-6.5	-6.5	-8.3	31.7	-6.4	-6.2	-10.1	-7	12	-6	-6.2	-7.1	-6.7	-8.9	-6.8	-4.2	-8	-8.3	-6.6	-8.5	-10.1	-6.4
YGJ514	-5.3	-6	-3.4	-6.3	-3.7	-6.4	-4	-5	-5.6	-7	-6.5	-6.9	-4.4	-6	-3.9	-6.3	-6.8	-5.9	-5.3	-7	-4.8	-5.2	-5.2	-4.9	-5	-4	-5.8	-3.8	-5.5	-5.9	-7.5	-4.3	-4	-6.4	-6.7	-9.2	-3.7	-4.5	-4.9	-4.1	-7	-4.7	-7.4	-6.1	-5.2	-4.3	-6.8	-6.5	-5.6
YGJ515	-3.5	-4.5	-3	-4.4	-3.5	-4.8	-3.1	-3.3	-3.9	-4.9	-4.2	-4.4	-3.5	-4.8	-3.1	-4.1	-4.6	-3.9	-4.1	-4.4	-4.1	-3.6	-3.6	-3.3	-4.3	-3.1	-4.6	-3.2	-4.4	-4.5	-4.7	-3.3	-3	-4.7	-3.8	-5.6	-3	-3.4	-3.8	-2.9	-5.2	-3.6	-5	-3.7	-4.2	-3.4	-4.5	-4.5	-3.6
YGJ516	-4.8	-5.3	-3.8	-6.4	-3.9	-5.3	-4	-4.2	-5.2	-6.3	-5.9	-6.4	-4.3	-5.8	-3.8	-5.5	-6.1	-5.6	-4.4	-5.7	-4.9	-4.8	-4.8	-4.6	-5.8	-3.7	-5.4	-4	-5.2	-6	-6.9	-3.8	-3.7	-5.3	-5.4	-6.5	-3.7	-4.6	-4.2	-4	-6.2	-4.6	-6.6	-4.5	-4.9	-4.5	-6.6	-5.7	-4.5
YGJ518	-4.1	-4.4	-3.3	-4.6	-3.7	-5.1	-3.8	-3.3	-3.9	-5.1	-4.5	-4.9	-4.5	-5	-4	-4.6	-4.8	-4.5	-4.5	-4.8	-4.4	-4.7	-4.3	-4.2	-4.9	-3.3	-4.4	-4	-4.3	-5	-4.7	-3.8	-3.1	-5.7	-5	-5.8	-3.3	-4	-3.9	-3.7	-5.6	-3.7	-5	-5.3	-4.7	-4.2	-4.5	-4.7	-5.2
YGJ526	-4.6	-5	-3.7	-5.9	-4.2	-6.5	-4.6	-4.1	-4.7	-6.2	-5.7	-6.2	-5.2	-6.1	-3.9	-5.6	-5.9	-5.7	-5.5	-5.6	-5.1	-4.9	-4	-4.3	-6.4	-4	-4.8	-4.2	-5.4	-6.6	-6.1	-4.5	-3.8	-5.9	-5.7	-7.2	-3.8	-4.2	-4.6	-4.4	-6.3	-4.5	-6.8	-5.5	-5.2	-4.8	-5.7	-6.2	-5.7
YGJ527	-6.3	-6.5	-4.5	-7.6	-5	-5.9	-4.6	-5.3	-6.8	-6.6	-6.7	-8.3	-5.4	-2.9	-4.6	-7.1	-7.9	-6.5	-5.2	-7.1	-5.4	-6	-5	-5.7	-5.4	-4.4	-6.2	-5.1	-5.6	-6.9	-8.4	-4.5	-4.2	-6.7	-6.5	-6.3	-4.7	-5.2	-4.9	-5	-7.2	-5.7	-6.6	-6	-5.3	-5.5	-7.8	-7.2	-5.5
YGJ528	-5.7	-6.1	-3.5	-6.4	-4	-6.4	-4.3	-5.1	-5.8	-7.5	-6.8	-7.6	-4.6	-5.4	-3.4	-5.9	-6.8	-6	-5	-7.2	-4.6	-5.3	-4.1	-4.2	-5.4	-4.1	-5.8	-3.9	-5.2	-7.2	-7.4	-4.5	-4	-5.6	-6	-9	-3.9	-3.9	-4.3	-3.8	-6.7	-5.3	-8.2	-4.4	-5.8	-5	-7.2	-7.2	-5.4
YGJ530	-5.8	-5.8	-4.4	-7.3	-4.6	-6	-4.6	-4.9	-6.6	-7.4	-7.1	-7.5	-5.1	-4.9	-4.3	-6.4	-7.3	-6.1	-5.2	-6.6	-5.1	-5.2	-4.5	-5	-5.7	-4.6	-5.9	-4.7	-5.8	-6.9	-8.3	-4.4	-4.1	-6.1	-6.1	-8.3	-4.2	-5	-5.1	-4.2	-6.7	-5.3	-8.1	-5.5	-5.7	-5.1	-8.2	-6.5	-4.9
YGJ531	-5.8	-5.8	-3.9	-7.7	-4.8	-6.5	-3.8	-5.6	-6.4	-7.5	-6.7	-7.2	-4.6	-5.6	-3.9	-5.9	-7.5	-6.4	-6	-6.6	-5.2	-5.1	-4.9	-5.4	-5.5	-4.8	-6.2	-4.2	-6	-7.8	-8.9	-4.3	-3.7	-5.4	-5.7	-7.3	-4.5	-4.9	-5.4	-4.2	-7.2	-5.1	-8.3	-5.6	-5.5	-5.4	-7.7	-6.4	-4.7
YGJ532	-4.9	-5.4	-3.9	-5.9	-4	-6.2	-4	-4.6	-5.4	-7.1	-5.8	-6.5	-4.7	-6	-3.9	-5.3	-6.4	-5.5	-5	-5.8	-4.7	-4.6	-4.6	-4.6	-6.1	-3.8	-5.4	-4.2	-5.6	-6.8	-6.9	-4.2	-4.1	-5.7	-5.5	-8.1	-3.7	-4.4	-4.2	-3.7	-7	-4.6	-7.1	-5.2	-5.3	-4.6	-6.5	-6	-5
YGJ534	-5.1	-5.1	-3.8	-6.3	-4.2	-5.3	-4.5	-4.7	-5.3	-6.6	-5.7	-6	-4.6	-5.7	-3.7	-5.3	-6.2	-5.5	-5.3	-6.2	-4.6	-4.9	-4.1	-4.5	-4.7	-3.9	-5.3	-4.2	-5.6	-6.6	-7.1	-4.1	-3.8	-5.5	-5.6	-7	-3.7	-4.2	-4.9	-4	-6.4	-4.5	-7.1	-4.9	-4.6	-4.5	-6.5	-5.6	-4.8
YGJ536	-5.4	-5.5	-4	-7	-4.1	-4.4	-4.1	-4.7	-5.3	-6	-5.7	-5.9	-4.6	-5.2	-4.2	-6	-6.5	-5.6	-4.8	-5.6	-4.5	-5.1	-4.3	-5	-4.9	-3.9	-5.6	-5.2	-5.4	-6.8	-7.6	-3.9	-3.8	-5.2	-5.7	-5.7	-4.1	-4.4	-4	-4.2	-6.1	-4.5	-6.7	-4.8	-4.8	-4.6	-6.8	-6.3	-4.8
YGJ538	-5.1	-5.3	-3.8	-6.2	-4.7	-5.9	-4.4	-4.4	-5.1	-7.2	-5.8	-6.4	-4.9	-6.4	-4.4	-5.6	-6.2	-5.9	-5.5	-6.2	-4.9	-5.2	-4.9	-4.7	-6.9	-4.3	-5.5	-4.4	-5	-6.9	-7.1	-4.2	-4.1	-6.5	-5.7	-7.9	-3.9	-4.7	-5	-4.5	-6.7	-4.4	-7.1	-5.6	-5.4	-4.9	-6.1	-6.5	-5.9
YGJ539	-4.9	-5.2	-3.7	-5.4	-3.9	-5.6	-3.9	-3.9	-4.4	-6	-5.1	-5.4	-4.6	-5.8	-3.7	-5.5	-5.7	-4.8	-5.1	-5.2	-5	-4.9	-4.1	-4.2	-5.1	-3.4	-5.3	-4.2	-5.2	-6	-5.8	-4.1	-3.7	-5.5	-5.6	-6.7	-3.5	-4.3	-4.4	-4.4	-5.4	-4.4	-6.4	-4.9	-5.3	-4.5	-5.2	-5.6	-5.2
YGJ540	-6	-6.4	-4.4	-7.7	-4.5	-5.5	-5.5	-5	-7.3	-6.2	-6.6	-8.3	-5.5	-2.7	-4.6	-6.9	-7.3	-7.1	-5.5	-7.1	-5.4	-5.8	-4.9	-5.3	-5.7	-4.6	-6.4	-5	-5.4	-6.1	-8.4	-4.3	-4.7	-6.6	-6.4	-7.4	-4.9	-4.7	-5.1	-4.7	-7.5	-5.4	-7.1	-5.7	-5.7	-5.4	-8.4	-7.1	-5.4
YGJ546	-4.1	-5.2	-4.2	-5.1	-4.4	-4.5	-4.9	-3.8	-4	-5.3	-4.9	-4.9	-5.5	-5.2	-4.5	-5.3	-5.5	-4.8	-5.7	-5.8	-4.6	-5.6	-5.2	-4.4	-6.1	-3.4	-4.1	-4.6	-4.9	-5.3	-5.1	-4.5	-3.4	-5.3	-5.5	-5.8	-3.9	-4.4	-5	-4.6	-5.4	-4.3	-5.3	-5.3	-6.4	-5.1	-4.6	-5.2	-6.3
YGJ547	-4.6	-3.6	-2.9	-4.4	-3.7	-4.4	-4.2	-3.4	-3.8	-4.6	-4.1	-4.4	-4.5	-5	-4.7	-4.4	-5.1	-4.1	-4.9	-4.7	-4.1	-4.8	-5	-3.8	-5	-3.1	-3.6	-4	-4	-4.5	-4	-4.2	-3	-5.4	-4.8	-4.6	-3.2	-4.4	-4	-4.3	-4.4	-3.3	-4.3	-4.9	-4.7	-4.3	-4.2	-4.8	-5.9
YGJ553	-4.5	-5	-3.6	-5.5	-3.9	-5.8	-3.9	-4.1	-4.8	-6.5	-5.5	-5.9	-4.4	-5.6	-3.6	-5.1	-5.7	-5.3	-4.5	-5.7	-4.7	-4.5	-4.5	-4	-5.6	-3.5	-5.5	-4	-4.8	-6	-6.7	-4	-3.6	-5.7	-4.9	-7.1	-3.5	-4.2	-3.9	-3.7	-6.5	-4.2	-6.3	-4.8	-4.7	-4.5	-5.7	-5.7	-4.8
YGJ555	-4.7	-4.5	-3.6	-5.3	-3.7	-5.5	-4.8	-3.8	-4	-5.4	-4.8	-5.1	-5.6	-6	-4.1	-5.3	-5.5	-4.9	-5.5	-5.6	-4.8	-5.6	-5	-4.7	-6.4	-3.7	-4	-4.5	-4.7	-5.5	-5	-4.5	-3.5	-5.4	-5.5	-5.6	-3.6	-4.5	-4.7	-4.7	-5.2	-4.3	-5.5	-6.3	-6	-4.8	-4.9	-5.7	-6.5
YGJ557	-4.4	-3.9	-3.7	-4.4	-3.5	-5.2	-4.2	-3.4	-3.8	-4.7	-4.5	-4.7	-4.6	-5.5	-4.4	-4.7	-4.9	-4.6	-4.6	-4.8	-4.4	-4.9	-4.4	-4	-4.8	-3.1	-3.8	-3.9	-4.1	-4.7	-4.7	-3.7	-3.4	-5.3	-4.9	-5.4	-3.6	-3.9	-4.2	-3.9	-5.1	-3.7	-4.5	-5.1	-4.7	-4.3	-4.5	-5	-5.5
YGJ560	-4.5	-4.6	-3.6	-5	-3.7	-5.3	-4.3	-3.4	-4.1	-5.5	-4.7	-5.3	-4.8	-5.4	-4.2	-5	-5.1	-4.8	-5	-5.4	-4.6	-5.3	-4.8	-4.2	-5.5	-3.5	-4.6	-4.5	-4.4	-5.5	-5	-4	-3.4	-5.8	-5.4	-5.9	-3.5	-4.2	-4	-4.2	-5.8	-4.1	-5.4	-5.6	-5.2	-4.3	-4.8	-5.1	-5.7
YGJ561	-5.3	-6.3	-3.8	-6.6	-4.6	-6.5	-4	-4.6	-5.8	-6.6	-6.3	-7.3	-4.4	-5.7	-3.8	-6.3	-6.9	-6.2	-5.5	-6.3	-4.9	-5.1	-3.9	-4.8	-5.4	-3.7	-6	-4.1	-5.4	-7.4	-8.1	-4	-3.8	-5.9	-5.7	-7.9	-4	-4.6	-4.8	-4.1	-6.4	-4.8	-7.3	-5	-4.8	-4.9	-7	-6.1	-5.4
YGJ562	-5.7	-4.2	-3.9	-5.2	-3.6	-5.6	-4.5	-3.6	-3.9	-5.4	-5.1	-5.4	-5	-5.8	-4.7	-5.6	-5.5	-4.9	-5.2	-5.6	-4.4	-5.7	-5.1	-4.2	-5.6	-3.3	-4	-4.3	-4.7	-5.3	-4.9	-4.3	-3.4	-5.4	-5.8	-5.9	-3.4	-4.6	-4.4	-4.8	-5.7	-3.9	-5.2	-5.8	-5.4	-4.6	-4.8	-5.2	-6.7
YGJ563	-4.8	-5	-3.9	-5.7	-4.3	-5.9	-4.5	-4.2	-4.6	-6.6	-5.6	-5.8	-5	-6.1	-4.1	-5.3	-5.7	-5.4	-5.2	-5.8	-4.7	-5.3	-5.6	-4.5	-6.7	-4	-5.1	-4.7	-5	-5.9	-6	-4.3	-3.9	-6.4	-5.4	-6.9	-3.6	-4.7	-4.7	-4.4	-6.6	-4.4	-6.3	-5.7	-5.6	-4.9	-5.6	-5.5	-6.3
YGJ564	-4.9	-4.8	-3.6	-5.8	-4.3	-5.4	-5	-3.9	-4.6	-6.5	-5.4	-6.2	-5.1	-5.8	-4.2	-5.8	-6	-5.5	-5.9	-5.5	-4.7	-5.7	-5.3	-4.3	-5.9	-3.7	-4.7	-4.7	-5.2	-5.7	-5.7	-4.1	-3.7	-5.8	-5.9	-7	-3.8	-4.6	-4.6	-4.5	-6.5	-4.4	-6.3	-6	-5.9	-5.2	-6	-5.5	-5.8
YGJ565	-4.7	-4.8	-3.3	-5.2	-3.6	-5.1	-4	-4	-4.3	-5.7	-5	-5.4	-4.2	-5.1	-3.9	-4.7	-5.4	-4.8	-4.6	-5.4	-4.5	-4.8	-4.6	-4.3	-5.5	-3.4	-4.5	-4.3	-4.5	-5.9	-5.7	-3.9	-3.6	-5.2	-4.8	-6.3	-3.5	-4.3	-4	-3.9	-5.7	-3.9	-5.8	-5.2	-4.9	-4.1	-5.3	-5.2	-5.1
YGJ566	-7.9	-7.8	-5.2	-8.5	-5.1	-8.4	-4.6	-6.2	-8.7	-8.4	-9.5	-9.1	-6.3	16.3	-4.9	-8.5	-7.5	-8.1	-5.5	-9.3	-6.8	-6.7	-5.1	-6.4	-7.9	-5.7	-6.6	-5.8	-6.2	-8.5	11.5	-5.7	-5.1	-8.5	-8.5	3.8	-5.5	-5.7	-6.1	-5.9	-8.3	-6	-4.6	-7.9	-7.4	-5.4	-9.2	-9.9	-5.4
YGJ567	-5.7	-5.7	-4	-7	-4.7	-7.2	-4.3	-4.8	-6.7	-7.6	-7.2	-8.4	-5.7	-3.6	-4.7	-7.4	-8.1	-7.5	-6.4	-8.1	-5.1	-6.4	-4.9	-5.2	-7.1	-4	-5.7	-5.3	-5.1	-7.5	-5.8	-5.2	-4.2	-7.7	-7.6	-7.8	-4.4	-4.6	-5.5	-5.1	-7	-5.2	-7.2	-6.4	-6	-5.9	-7.9	-7.6	-6.7
YGJ568	-6.3	-6.6	-4.5	-8.2	-5.3	-8	-5.6	-6.4	-7.3	-9.3	-8.2	-9.3	-5.9	-4.8	-5.5	-7.7	-9.4	-7.7	-6.4	-8	-5.8	-6.9	-5.7	-5.8	-6.7	-5.1	-7.4	-5.4	-6.3	-9.1	-6.4	-5.3	-5.4	-8.2	-7.6	-10.9	-4.9	-5.4	-6.2	-5.4	-9	-6.1	-8	-7	-7	-5.8	-9.5	-8.1	-7.1
YGJ569	-5.5	-5.8	-3.4	-6.5	-3.9	-6.2	-3.5	-4.3	-5.3	-6.8	-5.8	-7.1	-4.4	-4.5	-3.5	-5.9	-6.6	-5.7	-5.5	-6.9	-5.1	-4.8	-3.7	-4.5	-5	-4.2	-5.3	-3.8	-5.4	-6.7	-6.3	-4.3	-4.1	-5.9	-6	-8.2	-3.4	-3.9	-5.2	-4.4	-5.9	-4.5	-7.5	-4.6	-4.9	-4.6	-6.8	-6.7	-5
YGJ571	-6.8	-6.4	-4.6	-8.4	-5.1	-7.4	-5.7	-6	-7.1	-9	-8.1	-8.6	-5.9	-6.4	-5	-8	-8.3	-7.4	-6.6	-7.7	-6.2	-7	-5.6	-5.6	-6.9	-5.3	-6.7	-5.4	-6.4	-8.5	-7	-5.3	-5.2	-7.8	-8	-11.1	-4.7	-5.4	-5.8	-5	-8.6	-5.8	-8.9	-7.6	-6.4	-6.1	-8.6	-8.2	-6.7
YGJ573	-6.8	-6.6	-4.7	-7.9	-4.9	-7.1	-5.4	-5.7	-6.6	-8.8	-7.6	-9.4	-6.6	-7.5	-4.8	-7.7	-8.7	-7.2	-7	-8.2	-5.9	-6.7	-5.2	-6.2	-6.8	-5.3	-6.8	-5.9	-5.9	-8.5	-4.3	-6	-5.1	-7.7	-7.9	-10.6	-4.8	-5.7	-5.6	-5.7	-8.9	-5.8	-9.8	-7.1	-6.9	-5.9	-8.5	-8.3	-7.5
YGJ575	-4.7	-4.7	-3.7	-5.4	-4.1	-5.1	-4.2	-4.2	-4.5	-5.8	-5.2	-5.7	-4.6	-4.7	-4.3	-5.6	-5.4	-5.3	-5.5	-5.8	-4.4	-5.8	-4.9	-4.5	-5.4	-3.6	-4.6	-4.8	-5.5	-5.7	-6.1	-4.1	-3.6	-5.6	-5.6	-5.4	-3.7	-4.4	-4.6	-4.7	-5.7	-4.4	-6.5	-5.9	-5.3	-5	-5.5	-5.5	-5.4
YGJ576	-5.6	-6.5	-4.6	-7.3	-4.9	-7.3	-4.6	-5.6	-6.6	-8.1	-7.6	-8.1	-5.1	-6	-4.9	-7	-7.8	-6.8	-6	-6.9	-5.5	-5.8	-5.3	-5.3	-7.4	-4.8	-6.3	-5.3	-7.1	-7.3	-8.8	-4.8	-4.9	-7.2	-7	-10	-4.2	-5.3	-5.5	-5.1	-8.1	-5.5	-8.8	-6.1	-5.9	-5.5	-7.8	-7.2	-5.7
YGJ578	-5.9	-6.4	-4.4	-7.1	-4.5	-6.5	-4.9	-5	-6	-8.7	-7	-7.8	-5.7	-6.9	-4.8	-6.9	-7.6	-6.8	-6.2	-6.8	-5.2	-6.2	-4.6	-5.4	-6.8	-4.4	-6.5	-5	-6.4	-8.1	-7.9	-5.5	-4.6	-7.3	-6.8	-9.4	-4.7	-5.3	-5	-4.9	-7.9	-5.2	-9	-7.2	-6.3	-5.4	-7.5	-7.5	-6.9
YGJ580	-5	-4.9	-3.8	-6.4	-4.6	-5.9	-4.7	-4.1	-5	-6.9	-5.5	-6.4	-4.7	-5.9	-3.8	-6	-6.4	-5.8	-5.4	-6	-4.8	-5.2	-4.4	-4.3	-6.2	-3.9	-5.2	-4.4	-5.8	-6.5	-5.2	-4.2	-4	-6.1	-5.9	-7.2	-4	-4.6	-5.1	-4.3	-7	-4.4	-6.8	-5.7	-5.7	-4.9	-6	-6.3	-5.4
YGJ587	-5.9	-6.6	-4.4	-8	-4.3	-6.4	-4.4	-5.5	-7.2	-8.1	-7.2	-7.4	-5.1	-4.7	-3.9	-6.6	-7.5	-6.9	-5.3	-6.3	-5.4	-5.5	-4.6	-5.6	-6.3	-4.7	-6.8	-5.2	-5.6	-8.1	-8.7	-4.6	-4.5	-6.7	-6.5	-7.5	-4.4	-5.3	-5.1	-4.6	-7.4	-5.3	-9.6	-6.1	-5.9	-5	-8.2	-7.1	-5.3
YGJ588	-6.1	-6.8	-4.5	-7.6	-4.7	-5.4	-4.4	-5.1	-6.9	-6.6	-6.8	-6.1	-4.9	-2.7	-4.4	-6.1	-7.1	-6.6	-4.5	-6.8	-5.1	-5.9	-4.4	-5.6	-5.1	-4.5	-6.5	-5.7	-6.6	-6.5	-9.4	-4	-4.5	-6.5	-5.6	-4.8	-4.7	-4.6	-4.9	-4.5	-7	-5.8	-6.3	-5.5	-5.2	-5.4	-7.9	-6.9	-5.6
YGJ591	-3.7	-4.6	-3.3	-4.3	-3.5	-4.5	-3.6	-3.4	-3.7	-4.9	-4.2	-4.6	-3.9	-5.1	-3.4	-4.2	-4.6	-4.1	-4.1	-4.3	-3.7	-3.9	-4.3	-3.5	-4.7	-3	-4.4	-3.5	-4.5	-5	-4.8	-3.3	-2.9	-4.9	-4.3	-5.5	-3	-4	-3.7	-3.2	-5.4	-3.7	-5.2	-4	-4.8	-3.6	-4.6	-4.5	-4.2
YGJ598	-6.3	-6.2	-4.1	-7.9	-5.2	-6.9	-5.1	-5.6	-6.2	-8.5	-7.4	-8.7	-5.8	-4.2	-4.7	-6.8	-8	-6.7	-6.9	-7.4	-5.5	-6.3	-5.4	-5.9	-6.9	-5	-6.2	-4.9	-6	-8.3	-5.8	-5.3	-5.1	-7.8	-7.3	-9.9	-4.4	-5.4	-5.1	-5.3	-8.7	-5.5	-9.7	-6.6	-6.6	-5.7	-7.7	-7	-6
YGJ599	-7.3	-6.7	-4.8	-7.1	-5.1	-6.9	-5.3	-5.3	-6.4	-8.5	-7.7	-8.3	-6.4	8.2	-5	-7.8	-8.4	-7.4	-6.6	-7.8	-6.1	-6.8	-5.7	-5.6	-7.1	-5.2	-6.1	-5.7	-5.7	-7.2	3.2	-5.8	-4.7	-8.2	-8	-4.9	-5	-5.5	-5.9	-5.7	-8.9	-6	-6.5	-7.4	-6.7	-5.7	-6.7	-8.6	-6.7
YGJ600	-6.2	-6.6	-4.5	-7.2	-4.9	-6.8	-4.8	-5.3	-6.4	-7.8	-7.1	-8	-6.1	-5.5	-4.6	-7.6	-7.7	-7.5	-6.9	-7.4	-5.9	-6.4	-5	-5.5	-6.8	-4.5	-6	-5.2	-6.2	-7.6	-5	-5.4	-4.7	-7.5	-7.9	-8.2	-4.6	-5.4	-5.5	-5.5	-8.2	-5.7	-8.4	-6.7	-6.2	-6.1	-7.3	-7.6	-6.5
YGJ602	-7.9	-8.2	-5.3	-8.5	-6.2	-7.7	-6	-6.5	-8.1	-10	-9.2	-7.1	-5.8	3.4	-5.5	-7.7	-7.6	-7.3	-7	-9.2	-6.6	-7.6	-5.5	-6.6	-7	-5.4	-7.5	-6.8	-7.2	-7.4	-4.5	-5.8	-5.6	-9.5	-8.3	0.9	-5.2	-6.2	-6.7	-7	-10	-7	-8.7	-7.6	-7.4	-6.8	-9.1	-9.6	-7.3
YGJ603	-4.6	-4.9	-4	-5.7	-4.1	-6.4	-3.7	-4.7	-5.5	-7.2	-5.7	-6.3	-4.6	-5.7	-3.4	-5.1	-5.9	-4.8	-4.7	-5.8	-4.2	-4.2	-4	-4.1	-5.3	-4	-5.1	-3.9	-5.3	-6.1	-6.7	-3.8	-3.9	-5	-5.1	-7.6	-3.4	-4	-5.2	-3.4	-6.7	-4.1	-7.1	-4.5	-5.1	-4.1	-5.9	-6.1	-4.6
YGJ604	-5.7	-6.2	-4.3	-7.2	-5.1	-7.2	-4.7	-5.4	-6.1	-8.9	-7.1	-7.8	-5.6	-7.6	-4.4	-6.5	-7.4	-6.7	-5.8	-7.2	-5.5	-6	-5.1	-5	-6.3	-4.4	-6.5	-4.6	-6.4	-7.4	-8.3	-5.3	-4.7	-6.8	-6.3	-9.3	-4.3	-5.1	-5.3	-5	-7.7	-5.3	-8.3	-6	-5.8	-5.4	-7.6	-7.6	-6.5
YGJ607	-5.8	-6.3	-4.4	-6.7	-4.5	-6.9	-5.2	-5.1	-6	-7.8	-6.3	-7.6	-5.8	-6.3	-4.5	-6.8	-6.8	-6.1	-6	-7.1	-5	-6.1	-5.9	-5.6	-6.2	-4.1	-6.1	-4.5	-6	-7.3	-7.9	-4.7	-4.3	-6.6	-6.8	-8	-4.2	-4.7	-5.5	-5.3	-7.2	-5.4	-7.7	-6.4	-5.7	-5.6	-7.2	-6.8	-7.6
YGJ609	-4.5	-5.6	-4	-5.7	-4.1	-5.6	-3.6	-4.6	-5.5	-6.9	-5.7	-6.3	-4.1	-5.8	-3.5	-5	-6	-5.5	-4.9	-5.7	-4.8	-4.2	-3.9	-4.4	-5	-4	-5.9	-4	-5.5	-6.7	-7	-3.7	-3.7	-4.9	-5.2	-7	-3.5	-4	-4.7	-3.3	-5.9	-4.4	-7.1	-4.7	-4.8	-4.2	-6.7	-6.2	-3.9
YGJ610	-6.7	-6.7	-5.3	-7.8	-5.4	-7.5	-5.4	-5.8	-6.8	-8.8	-8.1	-9	-6.2	-5.8	-5.5	-7.8	-8	-7.5	-7.4	-7.8	-6.4	-7.2	-5.7	-6.4	-6.5	-5.1	-6	-5.6	-6.6	-8.3	-2.3	-6	-4.8	-8.1	-8.2	-6.5	-4.8	-5.8	-6.1	-6.1	-8.8	-6.2	-8.1	-7.6	-6.7	-6.1	-8	-8.4	-7.5
YGJ611	-7	-7	-5	-8	-5.7	-7.6	-5.6	-6.5	-6.7	-9.2	-7.9	-8.5	-6.3	-6	-5.1	-7.5	-8.2	-7.5	-6.5	-7.9	-6.1	-6.9	-5.5	-6	-6.6	-5.1	-6.7	-5.4	-6.4	-8.8	-6.2	-5.4	-4.7	-7.8	-7.8	-7.9	-5.1	-5.6	-6.2	-6.1	-7.9	-5.8	-9.8	-6.9	-7	-6	-8.2	-7.8	-7
YGJ612	-3.1	-3.2	-3.1	-3.4	-2.9	-4	-3.4	-2.8	-3.1	-3.8	-3.2	-3.7	-3.9	-4.6	-3.3	-3.9	-3.7	-3.5	-3.9	-4.3	-3.3	-4.2	-4	-3.2	-4.3	-2.6	-3.2	-3.6	-3.1	-3.6	-3.4	-3.3	-2.7	-4.1	-4	-3.9	-2.6	-3.8	-3.5	-3.3	-3.6	-2.7	-3.7	-4.3	-4.2	-3.6	-3.7	-3.7	-4.8
YGJ613	-4.8	-5.5	-3.9	-5.7	-4.6	-5.9	-4	-4.2	-5.1	-7.1	-5.4	-5.9	-4.8	-5.7	-3.7	-5.5	-5.7	-5.1	-4.9	-5.7	-4.9	-4.5	-3.9	-4.5	-5.6	-3.8	-5.5	-4.1	-5.4	-6.6	-6.5	-4.2	-3.8	-5.9	-5.3	-7.3	-3.7	-4.2	-4.5	-3.7	-6.8	-4.3	-6.8	-4.9	-5.3	-4.2	-6.1	-5.9	-5.1
YGJ616	-4.8	-6	-4.1	-6.1	-4.6	-6	-4.3	-4.6	-5.4	-7.5	-5.8	-6.4	-5.2	-6.1	-4	-6.3	-6	-5.6	-5.5	-6.1	-5.1	-5.3	-4.4	-4.6	-6.2	-4.1	-5.9	-4.7	-5.2	-7.2	-6.7	-4.6	-4	-6.2	-6.3	-7.9	-3.9	-4.9	-4.9	-4.2	-7.1	-4.5	-7.1	-5.5	-6	-4.7	-6.2	-6.5	-5.5
YGJ619	-4.9	-4.4	-3.4	-4.9	-4	-5.6	-4.5	-3.6	-4.2	-5.2	-4.6	-5	-5.2	-5.3	-4.2	-5.2	-5.1	-4.6	-4.9	-5.1	-4.6	-5.1	-5	-4.2	-5.4	-3.4	-4.3	-4.6	-4.4	-5.4	-4.8	-4.1	-3.2	-5.3	-5.2	-5.7	-3.6	-4.5	-4.5	-4.4	-5.3	-3.9	-5.2	-5.4	-5.1	-4.6	-4.7	-5.1	-5.7
YGJ620	-5.4	-5.9	-4.3	-6.9	-4.3	-6.2	-4.3	-4.9	-6.2	-7.4	-6.4	-7.8	-4.6	-5.3	-4.2	-6	-7.2	-6.3	-5.4	-6.7	-4.8	-5.4	-4.3	-4.9	-5.6	-4.1	-6	-4.4	-5.6	-7.6	-8	-4.3	-4.3	-6.3	-6	-8	-4.1	-5.1	-4.9	-4.3	-7.4	-5.4	-7.7	-5.2	-5.4	-4.8	-7	-6.2	-5.5
YGJ623	-5.3	-5.8	-4.4	-6.9	-4.6	-6.3	-4.8	-4.8	-6.1	-8.2	-7.1	-7.7	-5.6	-6.4	-4.5	-7.2	-7.2	-6.7	-5.7	-6.7	-5.1	-6.2	-5.2	-4.9	-6.3	-4.1	-6.1	-4.8	-5.7	-7.9	-7.5	-5	-4.4	-7.3	-6.9	-9.9	-4.2	-5.3	-5	-4.8	-7.9	-5.3	-8.4	-6.7	-6.2	-5.1	-7.5	-6.8	-6.2
YGJ624	-7.2	-7.9	-5.4	-8.4	-5.9	-7.3	-4.9	-6.3	-8.9	-8.4	-10.1	-8	-6.6	25.5	-4.5	-8.9	-10.6	-8.2	-7.7	-9	-6.1	-7.6	-5.7	-6.2	-8.2	-5.5	-7.1	-6	-5.8	-9.4	13.6	-6.2	-5.3	-8.5	-8.7	6.9	-5.1	-5.5	-6.1	-5.9	-9	-7.2	-7.6	-7.4	-7.5	-6.1	-4.1	-10.1	-6.7
YGJ628	-5	-5	-3.7	-5.4	-3.9	-5.8	-4.6	-3.9	-4.4	-5.9	-5.3	-5.5	-4.7	-5.8	-4.3	-5.5	-5.3	-5	-5.3	-5.6	-4.7	-5.1	-5.3	-4.4	-6	-3.5	-4.5	-4.5	-5.1	-5.8	-5.7	-4.2	-3.8	-6	-5.5	-6.7	-3.8	-5	-4.5	-4.3	-5.7	-4.1	-5.7	-5.8	-5.3	-4.6	-5.4	-5.6	-6.2
YGJ630	-4.7	-4.8	-3.3	-5.3	-3.7	-5.2	-3.8	-3.8	-4.6	-5.9	-4.9	-5.4	-4.1	-5.3	-3.8	-4.5	-5.5	-4.8	-4.6	-5.3	-4.5	-4.3	-4.5	-4.2	-5.6	-3.5	-4.6	-4.3	-4.6	-5.6	-5.8	-3.8	-3.7	-5.3	-4.5	-6.5	-3.2	-4.2	-3.9	-3.5	-5.9	-3.9	-6.1	-4.9	-4.6	-3.8	-5.4	-5	-4.6
YGJ633	-6.2	-6.3	-4.1	-6.8	-4.4	-7	-4.5	-5.4	-6.6	-7.7	-7.6	-8.2	-5.2	-6.4	-4	-6	-7.3	-6.3	-5.8	-7.3	-5.8	-4.9	-4.8	-5	-6.1	-4.8	-6.4	-4.5	-6.5	-7.4	-8.7	-4.6	-4.3	-6.5	-6.6	-9.2	-3.9	-5	-5.7	-4.4	-7.3	-5.5	-8.8	-5.6	-6.5	-5.1	-7.8	-6.7	-5.6
YGJ635	-4.3	-4.3	-3.3	-4.7	-3.3	-4.8	-3.5	-3.6	-4.1	-5.4	-4.7	-4.9	-3.7	-5.3	-3.6	-4.3	-5	-4.3	-4	-4.7	-4.2	-4.2	-4.2	-3.8	-5.1	-3.2	-4.8	-4.1	-4.2	-5.1	-5.2	-3.5	-3.5	-5.5	-4.2	-5.8	-3.1	-3.9	-3.8	-3.3	-5.8	-3.7	-5.2	-4.5	-4.2	-3.6	-5	-4.4	-4.3
YGJ636	-6	-6.1	-4.5	-8	-4.7	-7	-4.7	-5.2	-6.6	-7.9	-7.7	-8.7	-5.3	-3.9	-4.3	-7	-8	-7	-5.6	-7.4	-5.9	-5.6	-4.7	-5	-6.6	-4.7	-6.4	-5.1	-6.7	-7.2	-9.5	-4.4	-4.9	-6.8	-6.7	-9.1	-4.2	-5	-5.5	-4.4	-7.4	-5.5	-8.7	-5.9	-5.7	-5.3	-8.8	-7.6	-5.4
YGJ641	-5.9	-6.4	-4.6	-8.1	-4.7	-7.7	-4.7	-5.8	-7.2	-9.9	-7.8	-9.1	-5.6	-5.9	-4.8	-6.8	-8.5	-7.8	-5.6	-8	-6.1	-5.9	-4.9	-5.9	-6.8	-4.9	-7.4	-5	-5.7	-9.2	-9.1	-5.6	-5	-8.1	-6.8	-11.4	-4.4	-5.6	-5.9	-4.5	-9.3	-5.7	-9.8	-6.1	-6.6	-5.4	-8.8	-7.3	-5.5
YGJ642	-4.9	-5.4	-3.8	-6.4	-4	-6.7	-4	-4.8	-5.7	-7.7	-6.2	-6.8	-4.6	-5.9	-4.1	-5.3	-6.7	-6.1	-4.6	-6.5	-5.3	-4.8	-5.1	-4.5	-5.8	-4.1	-5.9	-4.2	-5.5	-7.1	-8	-4.4	-4.1	-6.4	-5.3	-8.5	-3.7	-4.6	-4.3	-3.7	-7.6	-5	-7.5	-5.1	-5.5	-4.2	-6.7	-6	-4.3
YGJ645	-5.8	-6.8	-4.6	-7.5	-4.6	-6.9	-4.5	-5.4	-6.9	-8.3	-7	-8	-5	-6	-4.5	-6.7	-7.9	-7.1	-5.3	-6.8	-5.8	-5.8	-4.7	-5.5	-6.4	-4.8	-6.6	-5	-5.7	-8.6	-8.7	-5.1	-4.6	-6.7	-6.5	-9.4	-4.2	-5.3	-5.3	-4.5	-9	-5.5	-9.1	-5.6	-6.1	-5	-8	-7.2	-5.2
YGJ646	-4.9	-4.8	-3.9	-6	-4.5	-5.8	-4.3	-4.2	-5.1	-6.8	-6	-6.5	-4.9	-5.5	-3.7	-5.8	-6.2	-5.5	-5.4	-5.5	-4.9	-5.3	-3.9	-4.1	-5	-3.8	-5.1	-4.1	-5.7	-6.2	-6.2	-4.1	-3.8	-5.7	-6.1	-7.9	-4	-4.2	-4.7	-4.1	-6.4	-4.5	-6.6	-5.5	-4.7	-4.6	-6	-6	-5
YGJ654	-4.9	-5.3	-3.8	-5.7	-4.3	-5	-4.8	-4.1	-4.8	-6.3	-5.1	-6	-5.4	-4.4	-4.6	-6.1	-5.9	-6	-5.9	-5.5	-4.7	-6	-6	-5.4	-5.7	-3.7	-4.8	-4.9	-5.3	-5.8	-6.3	-4.3	-3.8	-6	-6.2	-5.2	-3.9	-5	-4.9	-5.2	-6	-4.5	-6.1	-5.6	-6.1	-5.4	-5.7	-6.3	-5.9
YGJ656	-5.6	-6.3	-4.1	-7	-4.2	-5	-4.9	-4.2	-5.4	-6.6	-5.8	-7.1	-5.5	-4.4	-4.4	-6.3	-6.4	-5.9	-5.3	-5.7	-5.2	-6.1	-6.3	-5.1	-6.6	-4	-5.5	-4.7	-6.2	-6.6	-7	-4.6	-3.8	-6.1	-6.6	-6.4	-4.2	-4.7	-4.8	-5	-6.4	-4.9	-6.8	-6	-5.5	-5.4	-6.3	-6.4	-5.7
YGJ658	-4.9	-5.3	-3.6	-6	-4.5	-4.9	-4.6	-4.3	-4.9	-6.1	-5.4	-6.1	-5.3	-5.9	-4.6	-5.8	-5.9	-5.5	-5.2	-6	-4.6	-5.6	-5.7	-5.1	-5.4	-4	-4.8	-5	-5.4	-6.3	-6.5	-4	-3.8	-5.8	-6.1	-6.6	-3.9	-4.6	-4.6	-4.8	-5.8	-4.2	-6.2	-5.9	-5.7	-5.3	-5.7	-5.6	-6.3
YGJ661	-4.8	-5.3	-3.4	-6.3	-3.9	-4.8	-4.6	-4.5	-4.9	-5.4	-5.2	-6.7	-5.4	-3.3	-4.5	-6.4	-6.6	-5.6	-5.6	-5.7	-4.8	-6	-5	-4.8	-5.7	-3.8	-4.9	-4.9	-5.6	-5.6	-6.4	-4.2	-3.5	-6.2	-6.6	-6	-4	-4.3	-4.7	-4.9	-5.9	-4.5	-6.4	-6.1	-5.7	-5.9	-6	-6.6	-5.3
YGJ663	-5.2	-5.7	-3.9	-6.5	-4.1	-4.5	-4.9	-4.4	-5.2	-5.3	-5.7	-6.1	-4.8	-5.1	-4.6	-6.4	-6.1	-6	-6	-5.7	-4.7	-5.6	-5.5	-4.8	-5.7	-3.8	-4.8	-4.5	-5.6	-6.1	-6.7	-4.4	-4.3	-6.1	-6.4	-5.5	-4.3	-4.5	-4.5	-4.7	-6.1	-4.5	-6.5	-5.9	-5.3	-5.2	-6.1	-6.2	-5.2
YGJ666	-5.3	-6.5	-4.2	-6.9	-4.3	-4.8	-4.6	-4.4	-5.6	-6.8	-6.1	-7.3	-5	-4	-4.4	-6.5	-7	-6	-5.2	-6.2	-5	-5.8	-5.5	-4.6	-6.9	-3.9	-5.5	-4.5	-6	-6.3	-7.7	-4.7	-4	-6.5	-6.4	-6.5	-4.1	-4.7	-4.6	-5.3	-6.6	-4.9	-7.3	-6.5	-5.3	-5.3	-6.5	-6.5	-5.7
YGJ673	-5.6	-5.6	-3.8	-6.7	-4.3	-5.3	-4.7	-4.4	-5	-5.7	-5.5	-5.7	-4.7	-3.6	-4.7	-6.6	-6.1	-5.8	-4.8	-5.7	-4.8	-6.1	-6	-5.3	-6.4	-4.2	-5.2	-5	-5.2	-5.2	-7.3	-5	-3.9	-6.1	-6.5	-3.8	-4.3	-5	-5	-5	-6.7	-4.8	-6.3	-5.7	-5.7	-5.3	-6.1	-6.5	-5
YGJ674	-5.1	-5	-4.1	-5.8	-3.8	-4.9	-4.8	-3.8	-4.6	-5.9	-5.2	-5.8	-5.6	-5.3	-4.4	-5.9	-6	-5.8	-5.3	-6.1	-4.9	-6.2	-5.1	-4.7	-6.1	-3.5	-5	-5.2	-5.1	-6	-6	-4.3	-4.2	-5.6	-5.7	-5.4	-4.1	-4.5	-4.7	-4.6	-6.3	-4.5	-6.7	-5.8	-6	-5.1	-5.6	-6	-5.7
YGJ676	-6.3	-6.3	-4	-6.8	-4.6	-5.8	-5.2	-5	-6.2	-6.2	-6.6	-6	-5	7.7	-4.8	-7.4	-6.1	-6.6	-5.8	-6.7	-5.3	-6.5	-4.9	-5.9	-6.1	-4.3	-5.7	-4.9	-5.9	-5.7	-2.4	-5.1	-4.2	-8	-6.8	1.4	-5.3	-4.9	-5.1	-5.4	-8	-5.3	-5.1	-6.4	-5.6	-6.1	-6.1	-7.8	-6.9
YGJ680	-6.2	-6.7	-4.1	-8	-4.7	-5.6	-5.1	-4.5	-6	-6.9	-6.8	-7	-5.8	-2.6	-5.2	-7.9	-7	-7.4	-5.6	-7.2	-5.8	-7.2	-4.9	-5.9	-6.1	-4.3	-5.7	-5	-6.1	-7.3	-4.6	-4.9	-3.9	-7.3	-7.3	-5.2	-4.6	-4.7	-5.3	-5.2	-7.9	-5.8	-5.9	-6.3	-5.6	-6.2	-7.4	-7.5	-5.9
YGJ688	-4.9	-5.2	-3.6	-5.5	-3.8	-5.6	-3.9	-4	-4.7	-6.2	-5.2	-5.8	-4.3	-5	-3.8	-4.7	-5.9	-5	-4.6	-5.6	-4.7	-4.4	-4.7	-4.5	-5.6	-3.6	-5.2	-4.4	-4.9	-5.9	-6.2	-4	-3.7	-5.5	-4.8	-7.1	-3.3	-4.3	-4.2	-3.7	-6	-4.2	-6.4	-5.1	-4.9	-3.9	-5.9	-5.4	-4.7
YGJ689	-4.5	-4.8	-3.5	-5.2	-3.8	-5.3	-4.1	-4	-4.6	-6.1	-5	-5.6	-3.9	-5.4	-3.7	-4.6	-5.3	-4.8	-4.5	-5.4	-4.4	-4.2	-4.7	-4.1	-5.5	-3.7	-5.1	-4.1	-4.4	-5.7	-5.9	-3.9	-3.6	-5.5	-4.7	-6.6	-3.4	-4	-4.3	-3.7	-6.4	-4	-5.8	-4.7	-4.6	-4	-5.2	-5	-4.6
YGJ690	-7.7	-7.7	-4.4	-7.1	-5.5	-7.5	-5.1	-6	-7.5	-8.3	-7.9	-9.2	-6.2	14.6	-5	-8.6	-8	-8	-7.5	-9.4	-7	-7.8	-6.4	-6.1	-6.3	-5.2	-6.4	-5.8	-7.2	-6.7	4.3	-6.4	-5.6	-9.7	-7.3	3.4	-5.8	-5.4	-6.1	-6.3	-10.6	-6.2	-7.4	-8.9	-6.9	-6.7	-6.1	-10.6	-7.1
YGJ694	-5.1	-5.3	-3.6	-6	-3.8	-5.8	-4.5	-4.2	-5	-6.7	-6	-6.3	-5	-6.2	-4.2	-6	-6.3	-5.3	-5.7	-5.6	-4.6	-5.5	-4.8	-4.3	-5.8	-3.8	-4.9	-4.1	-5.6	-5.9	-6.4	-4.3	-4	-5.9	-5.6	-7.4	-3.9	-4.3	-4.3	-4.3	-6.1	-4.6	-6.6	-5.9	-5.1	-4.7	-6.1	-6.1	-5.5
YGJ695	-4.8	-5.8	-3.9	-6.3	-3.8	-6.3	-4.1	-4.4	-5.8	-6.7	-5.9	-6.4	-4.6	-5.2	-3.6	-5.2	-6.3	-5.6	-4.9	-5.9	-5.1	-4.7	-4.6	-4.4	-5.9	-3.9	-5.5	-4.4	-5.4	-6.5	-7.5	-4	-3.7	-5.9	-5.2	-7.8	-3.5	-4.4	-4.1	-3.7	-6.9	-4.4	-7.3	-5.1	-5.4	-4.3	-6.4	-6.1	-4.4
YGJ696	-2.8	-3.2	-2.4	-3.4	-2.9	-3.4	-2.7	-2.9	-2.8	-3.5	-3.2	-3.5	-2.8	-3.8	-2.8	-3.2	-3.4	-3	-2.9	-3.7	-3.4	-2.9	-3.1	-2.7	-3.6	-2.3	-3.4	-2.7	-3.2	-3.4	-3.5	-2.8	-2.7	-4.2	-3.2	-4	-2.5	-3.4	-3.2	-2.5	-4.2	-2.8	-3.7	-3.1	-3.5	-2.9	-3.6	-3.4	-3.3
YGJ698	-4.8	-5.2	-3.9	-5.8	-4.3	-5.9	-4.4	-4	-4.9	-7.1	-5.9	-6.3	-4.9	-6.4	-4	-5.6	-6.2	-5.4	-4.8	-6.1	-4.9	-5.3	-4.5	-4.6	-5.2	-3.6	-5.4	-4	-5	-5.7	-6.8	-4.1	-3.5	-5.9	-6.1	-7.9	-3.7	-4.3	-4.1	-4.3	-6.1	-4.4	-6.6	-5.3	-5	-4.6	-5.9	-5.9	-5.7
YGJ700	-7.8	-7	-5.4	-7.5	-5.4	-6.8	-4.6	-6	-8.2	-7.3	-9.5	-9.8	-5.6	8.2	-5.2	-9.7	-9.2	-7.5	-6.2	-8.6	-6.2	-6.8	-6.2	-5.8	-7.4	-5.4	-6.8	-6	-6.4	-8.8	-1.3	-6	-5.6	-8.4	-9.7	-3.5	-4.6	-5.1	-6.1	-5.3	-8.3	-6.2	-9.9	-6.7	-6.6	-5.7	-8.5	-9.5	-5.8
YGJ702	-7	-6.9	-4.4	-7.4	-4.6	-7.7	-4.3	-5.9	-7.2	-8	-7.7	-9.7	-6.1	-0.2	-4.4	-6.9	-7.9	-6.8	-6.4	-8.6	-5.5	-5.6	-5.4	-6	-7.2	-5	-6	-5.1	-5.8	-8	-2.2	-5	-4.5	-7.6	-7.6	-6.7	-4.6	-5.3	-5.6	-4.8	-7.8	-5.4	-9.7	-6.3	-6.7	-5.1	-8.1	-8.4	-6.9
YGJ704	-4.6	-5.2	-3.7	-5.6	-4	-6	-3.7	-4.3	-5.1	-6.5	-5.4	-6	-4.7	-5.7	-3.8	-5.3	-5.8	-5	-4.8	-5.6	-4.8	-4.5	-4.6	-4.3	-5.9	-3.7	-5.4	-3.9	-5.2	-6.3	-6.7	-4.1	-3.8	-5.7	-5.1	-7.5	-3.5	-4.3	-4.2	-3.6	-6.3	-4.2	-6.7	-4.9	-5	-4.3	-5.9	-5.8	-5
YGJ705	-4.8	-5.2	-3.8	-6.2	-4.2	-6	-4.6	-4.4	-5	-7.1	-6.1	-6.7	-4.7	-5.9	-4	-5.7	-6.4	-5.8	-4.9	-6.2	-4.7	-4.7	-4.9	-4.5	-5.9	-4.1	-5.2	-4.5	-5.1	-6.5	-6.8	-4.3	-3.7	-6.2	-5.8	-7.6	-3.7	-4.4	-4.9	-4.1	-6.7	-4.4	-6.7	-5.5	-5.8	-4.6	-6.4	-6.1	-5.9
YGJ706	-5.6	-5.9	-3.9	-6.1	-4.1	-5.9	-4.6	-4.5	-5.3	-6.7	-6.3	-7	-5.8	-5.7	-4.5	-6.8	-6.5	-6.2	-5.6	-6.6	-5.7	-5.8	-5.1	-5.1	-5.4	-4.1	-5.1	-4.5	-6.3	-6.9	-4.7	-4.7	-4.1	-6.6	-6.7	-8.1	-4.3	-4.6	-4.7	-5	-6.9	-4.9	-6.8	-6.7	-5.8	-5.3	-6.4	-6.3	-5.7
YGJ707	-7.7	-7.3	-4.6	-7.6	-5.5	-8.9	-4.7	-6.2	-7.7	-9.4	-9.9	-9	-5.5	6.9	-5.1	-8.3	-10.2	-7.8	-6.7	-8.4	-6.4	-6.8	-6.3	-7	-7	-5.9	-6.8	-5.1	-6.3	-8.7	6.5	-5.4	-4.9	-8.4	-8.6	-7.1	-5	-5.1	-7.1	-5.5	-8.9	-6.2	-8.2	-7.4	-6.8	-6	-8.7	-9.5	-5.8
YGJ708	-6.2	-6.5	-4.7	-8.4	-4.6	-6.9	-4.6	-5.3	-7	-9.2	-7.9	-8.4	-5.5	-3.1	-4.7	-6.6	-8.4	-7.6	-5.6	-7.4	-5.6	-5.9	-4.9	-5.4	-6.3	-5	-6.8	-5.1	-5.6	-8.6	-9.3	-4.7	-5.1	-6.8	-6.7	-8.8	-4.4	-5.6	-5.6	-4.5	-7.5	-6.3	-8.1	-6.1	-6.1	-5.5	-8.8	-7.2	-5.8
YGJ711	-5.3	-5.4	-3.5	-5.8	-4.3	-6.1	-4.6	-4	-4.8	-6.2	-5.6	-6.1	-4.9	-5.8	-4.2	-5.6	-6.1	-5.7	-5.2	-6.2	-5	-5.5	-5.2	-4.8	-6.4	-4.1	-4.5	-4.6	-5.3	-6.6	-6.2	-4.4	-3.8	-5.9	-5.5	-7	-3.7	-4.6	-4.5	-4.4	-5.9	-4.4	-6.5	-5.9	-5.4	-4.7	-6	-6	-6.1
YGJ712	-5.6	-6	-3.8	-6.1	-4.4	-6.5	-4.6	-4.5	-5.2	-6.3	-6	-6.7	-5.5	-6.6	-4.5	-6.5	-6.4	-6	-5.8	-6.9	-5.1	-5.7	-4.5	-4.7	-6.7	-4.1	-5.4	-4.3	-6	-6.6	-6.7	-4.9	-4.1	-6.2	-6.5	-8.1	-4.2	-4.7	-5	-4.7	-6.6	-5.1	-6.9	-6.2	-5.7	-4.7	-6.1	-6.4	-6.6
YGJ714	-4.7	-5.1	-3.9	-6.2	-4.4	-6.3	-4.7	-4.2	-5	-7.2	-5.7	-6.5	-5.1	-6.4	-4.3	-5.9	-6.1	-5.7	-5.5	-6.5	-5	-5.6	-5.7	-4.7	-6.3	-3.9	-5.3	-4.6	-4.8	-5.7	-6.3	-4.4	-4	-6.5	-5.8	-7.6	-4	-5.4	-5	-4.9	-6.6	-4.4	-6.4	-5.7	-6.2	-5.4	-5.8	-5.8	-6.4
YGJ715	-5.9	-6.2	-4.4	-7.5	-5.4	-6.3	-5.2	-5.1	-6.6	-7.1	-7.3	-8.3	-5.3	-2.7	-4.4	-7.1	-7.6	-7.2	-5.5	-7.5	-5.8	-5.8	-4.6	-5.8	-5.4	-4.9	-6.6	-5.5	-5.5	-7.1	-8.4	-4.4	-4.6	-7	-6.9	-8.5	-4.4	-4.8	-5.4	-4.7	-7.2	-5.4	-8	-6.5	-5.6	-5.7	-7.9	-6.8	-5.4
YGJ717	-5.3	-6.2	-4	-6.4	-4.1	-5.2	-4	-4.6	-6.2	-6	-6.3	-6.9	-4.6	-1.9	-3.6	-5.8	-7	-6.4	-4.2	-6.3	-4.6	-4.8	-3.7	-4.4	-5	-3.9	-5.7	-4.2	-5.4	-5.9	-9	-3.7	-3.8	-5.9	-5.6	-6.7	-3.8	-4	-4.3	-3.9	-5.9	-4.8	-6.8	-4.9	-4.5	-4.3	-7.8	-6.4	-4.6
YGJ719	-4	-4.1	-3.1	-4.9	-3.6	-4	-4.4	-3.1	-3.4	-4.6	-4.9	-5	-4.7	-5.7	-4	-5	-5.3	-4.7	-5.1	-5.2	-4	-5.5	-4.1	-3.7	-5.4	-3.7	-4	-4.3	-4.2	-5.1	-4.6	-3.8	-2.9	-5.3	-5.3	-5.5	-3.6	-4.5	-3.8	-4.1	-5.1	-3.8	-5	-5.3	-5.3	-4.4	-4.8	-4.9	-6.2
YGJ720	-5.6	-5.8	-4.1	-6.3	-4.2	-6.3	-4.4	-4.4	-5.3	-7.5	-6.4	-6.6	-5	-6.8	-4.4	-6.1	-6.4	-6.1	-5.3	-6.7	-5.1	-5.8	-5.3	-4.6	-6.5	-4	-5.9	-4.4	-5.7	-6.8	-7.1	-4.6	-4.2	-6.8	-5.9	-8.2	-3.9	-5	-4.4	-4.5	-7.2	-4.6	-7	-5.6	-5.7	-5.4	-6.4	-6.3	-6.3
YGJ722	-5.4	-5.9	-4	-6.8	-4.7	-6.9	-4	-5.1	-6.3	-7.9	-6.3	-7.3	-5.2	-7.6	-4.2	-6.2	-7.2	-6.4	-5.7	-6.9	-5.7	-5.5	-5.1	-4.7	-5.8	-4.5	-6.3	-4.6	-6.2	-7.1	-8.3	-4.8	-4.4	-6.5	-6.1	-8.7	-3.7	-4.5	-5	-4.3	-7.2	-4.8	-7.7	-5.5	-5.8	-5.2	-7.5	-6.5	-6.5
YGJ723	-7.2	-8.4	-4.4	-7.1	-5.7	-7.3	-4.7	-6.3	-8	-7.2	0.2	-7.3	-8	105.3	-5	-7.9	-7.8	-7	-5	-8.6	-6.6	-8.1	-5.6	-6.2	-7	-5.6	-7.5	-5.9	-6.5	-7.8	70.5	-5.8	-5.5	-9	-4.7	53.5	-5.7	-5.5	-6.2	-6.3	-2.9	-6.3	11.2	-8.5	-6.3	-5.8	1.1	-8.2	-5.5
YGJ724	-6	-6.3	-5.1	-7.5	-4.4	-5.9	-4.9	-4.9	-7.7	-6.8	-6.8	-7.3	-4.9	-4.5	-4.2	-6.7	-7.7	-6.6	-5.5	-7.2	-5.4	-5.5	-4.2	-5.1	-5.9	-4.5	-6.4	-5	-5.8	-7.3	-8.8	-4.1	-4.3	-6.3	-6.7	-7.1	-4.4	-4.7	-4.9	-4.6	-7.3	-5.3	-6.9	-5.6	-5.5	-5.1	-8.4	-7	-5
YGJ725	-6.2	-6.6	-4.7	-8.1	-4.5	-5.3	-4.9	-5.2	-7.5	-6.7	-7	-7.9	-5.5	-2.6	-4.7	-7	-8	-7	-5	-6.9	-5.3	-5.6	-4.9	-5.4	-6	-4.4	-6.6	-5.3	-5.9	-7.1	-9.6	-4.4	-4.6	-6.6	-6.6	-6.9	-4.3	-4.9	-4.8	-4.7	-7.1	-5.2	-7.3	-5.3	-5.2	-5.2	-9	-7.4	-5.6
YGJ726	-6	-6.4	-4.5	-7.5	-4.9	-6.5	-4.4	-5.5	-7	-7.4	-7.3	-7.4	-5.4	-4.2	-4.5	-6.7	-7.9	-7.3	-5	-6.9	-5.4	-5.6	-4.7	-5.6	-6	-5.2	-6.6	-5.7	-6.3	-8.7	-9.3	-4.4	-4.5	-6.4	-6.5	-5.8	-4.3	-4.9	-5	-4.5	-7.1	-5.6	-8.7	-5.9	-6.1	-5.4	-8.3	-7.1	-5.4
YGJ727	-6.3	-6.1	-4.5	-7.6	-4.3	-5.5	-4.5	-5.1	-6.7	-6.3	-6.6	-7.1	-4.8	-1.3	-4.2	-6.7	-7.5	-6.1	-4.7	-6.6	-5.1	-5.5	-4.5	-5.1	-5.3	-4.2	-6	-4.8	-5.6	-5.8	-9.2	-3.9	-4.3	-6.2	-6.1	-5.8	-4.1	-4.7	-4.5	-4.6	-6.8	-5.4	-6.5	-5.1	-5.2	-4.8	-7.9	-6.7	-5.2
YGJ728	-6.8	-7.4	-4.4	-7.3	-5	-7.5	-5.2	-6.1	-6.7	-9.1	-8.3	-9.3	-5.7	-5.2	-4.2	-6.9	-8	-7	-6.8	-8.8	-6.1	-6.3	-6	-5.8	-6.8	-5.2	-6.8	-5.4	-5.7	-8.5	1	-5.2	-5.2	-7.6	-7	-10.4	-5.2	-5.5	-6	-5	-9.4	-5.6	-7.3	-6.7	-7.1	-5.4	-8.6	-8	-6.4
YGJ730	-4.2	-5.1	-3.6	-5.2	-3.6	-5.3	-3.4	-4.1	-5.4	-6	-5.1	-5.8	-4.1	-5.4	-3.1	-4.9	-5.8	-4.8	-4.7	-5.2	-4.1	-4	-4.1	-3.6	-4.3	-3.6	-4.8	-3.6	-4.9	-5.9	-6.5	-3.3	-3.2	-5	-4.7	-6.9	-3.4	-3.7	-4.1	-3.3	-5.7	-4.2	-6.5	-4.1	-4.2	-4.1	-5.8	-5.5	-3.6
YGJ733	-5.3	-5.9	-3.7	-6.4	-5	-6.8	-4.2	-4.7	-5.4	-7.9	-6.2	-7.1	-5.5	-6.9	-3.9	-6.2	-6.6	-5.9	-5.2	-6.7	-5.6	-5.7	-4.9	-4.8	-5.6	-4.1	-5.8	-4.5	-6.1	-6.7	-7.5	-4.5	-4.2	-6.2	-6	-8.8	-3.7	-5.1	-4.8	-4.8	-6.2	-4.9	-7.9	-6.1	-5.5	-4.7	-6.6	-6.1	-6.2
YGJ734	-4.8	-5.3	-3.2	-5.3	-3.4	-5.2	-3.1	-4.2	-4.9	-5.6	-5.5	-5.8	-3.5	-6.2	-3.5	-4.7	-5.4	-4.9	-4.6	-5.4	-3.6	-4.1	-3.8	-3.7	-4.7	-3.2	-4.4	-3.2	-4.3	-5.3	-6.4	-2.9	-3.1	-4.9	-4.9	-7.4	-3	-3.1	-4.3	-3.6	-5.9	-4.2	-6.2	-4.2	-4.5	-3.8	-5.8	-5.6	-5
YGJ738	-5.1	-5.2	-4.3	-6.3	-4.2	-5.5	-4.7	-4.3	-5.4	-6.7	-5.9	-6.4	-4.7	-6	-4	-6	-6.8	-5.8	-5.4	-5.9	-4.7	-5.3	-5	-4.5	-5.7	-4.2	-5.5	-4.6	-5.2	-6.6	-7.3	-4.2	-4.2	-6.1	-5.9	-7.3	-4	-4.7	-4.5	-4.3	-6.3	-4.8	-6.8	-5.6	-5.4	-4.6	-6.9	-6.8	-5.4
YGJ740	-5.3	-5.2	-3.6	-5.8	-4	-5.7	-4.3	-4.3	-4.8	-6.4	-5.5	-6.2	-4.6	-5.6	-4.4	-5.4	-5.9	-5.3	-5.2	-6.2	-5	-5.3	-5.5	-4.6	-5.9	-3.8	-4.8	-4.7	-5.2	-6.3	-6.6	-4.3	-3.9	-5.8	-5.4	-7	-3.8	-4.4	-4.6	-4.1	-6.3	-4.4	-6.3	-5.8	-5.4	-4.3	-5.7	-5.4	-5.4
YGJ741	-5.2	-5.3	-3.5	-5.5	-3.7	-6.2	-4	-4.4	-5.6	-6.7	-6.3	-7.2	-4.2	-5.8	-3.7	-5.7	-5.7	-5.3	-4.3	-6.1	-4.2	-4.8	-3.7	-4	-5.6	-3.7	-5.3	-4.1	-5.1	-7.2	-7.1	-4.2	-4.3	-5.3	-5.6	-8.5	-3.8	-4.4	-4.1	-3.8	-6.3	-5	-7.3	-4.8	-5.6	-4.5	-6.3	-6.5	-5.1
YGJ743	-4.1	-4.7	-2.9	-5.3	-3.6	-5.6	-3.4	-4	-4.6	-5.8	-5	-5.4	-3.9	-5.6	-3.2	-4.4	-5.3	-4.6	-4.3	-5.3	-4	-3.8	-4	-3.8	-4.5	-3.3	-4.6	-3.5	-5	-5.8	-6.3	-3.8	-3.1	-5.1	-4.8	-7	-2.8	-3.2	-4.2	-3.5	-5.9	-3.9	-5.9	-4.1	-4.7	-3.6	-5.6	-4.7	-4.7
YGJ744	-4.6	-5.7	-3.7	-6.2	-3.8	-6.6	-3.8	-4.8	-5.8	-7.7	-5.9	-6.4	-4.7	-6.1	-3.6	-5.3	-6.2	-5.5	-4.9	-6	-4.5	-4.6	-4.3	-4.2	-5.3	-4	-5.9	-4.1	-5.9	-6.6	-7.6	-4	-3.9	-5.6	-5.3	-7.7	-3.6	-4.3	-4.7	-3.6	-6.7	-4.5	-7.3	-4.7	-5.2	-4.5	-6.5	-5.9	-4.8
YGJ745	-4.9	-5.3	-3.8	-5.7	-4	-6	-4.3	-4.5	-4.9	-7	-5.6	-6.4	-5.3	-7.2	-4.2	-5.9	-6	-5.4	-5.7	-6.7	-4.8	-5.5	-4.5	-4.5	-5.7	-3.7	-5.5	-4.3	-5.5	-6.3	-6.6	-4.7	-3.6	-5.8	-5.9	-7.5	-3.7	-4.9	-5.5	-4.3	-6.1	-4.4	-6.6	-5.3	-5.2	-4.6	-6.3	-5.9	-5.9
YGJ746	-4.3	-4.9	-3.6	-5.4	-3.3	-5.4	-3.7	-4	-4.7	-6	-5.3	-5.4	-4	-5.2	-3.8	-4.5	-5.2	-4.8	-4.1	-5.2	-4.6	-4.3	-4.6	-4	-5.5	-3.3	-5.1	-3.9	-4.3	-5.7	-6	-3.9	-3.7	-5.4	-4.5	-6.7	-3.3	-3.9	-3.5	-3.6	-6.6	-4.3	-6.1	-4.5	-4.3	-3.7	-5.7	-5.1	-4.7
YGJ747	-5.9	-6.9	-4.7	-7.4	-4.4	-6.4	-4.2	-5.4	-6.9	-7.2	-7.3	-8.7	-5	-2.5	-4.3	-7.1	-8.6	-6.9	-5.1	-7.2	-5.9	-5.7	-4.7	-5.6	-6.3	-4.8	-6.6	-5	-5.9	-6.5	-8.8	-4.7	-4.6	-6.9	-6.4	-7.2	-4.4	-4.8	-4.8	-4.5	-7.6	-5.6	-6.8	-5.3	-5.8	-5.5	-8.3	-7.7	-5.3
YGJ748	-3.7	-3.8	-3.1	-3.7	-3.2	-4.1	-3.1	-3.1	-3	-4	-3.7	-4	-3.7	-4.6	-3.6	-4	-4	-3.4	-3.6	-4	-3.3	-3.9	-3.9	-3.9	-4.5	-2.7	-3.7	-3.3	-3.9	-4.2	-3.8	-3.1	-2.8	-4.8	-4	-4.5	-2.7	-3.8	-3.5	-3.2	-4.5	-3.1	-4.2	-3.7	-4.3	-3.3	-3.9	-4.1	-4.1
YGJ749	-5.6	-5.7	-4.5	-6.6	-4.9	-6.9	-4.7	-5.1	-6	-8.3	-6.5	-7.6	-5.3	-7.1	-4.4	-6.3	-7	-6.5	-5.5	-6.8	-5.3	-5.6	-4.8	-5	-6.2	-4.2	-6.3	-4.6	-6.1	-7.5	-8	-4.5	-4.3	-6.2	-6.3	-8.7	-4.1	-5.1	-5.1	-4.5	-7.4	-5.2	-7.7	-5.8	-5.9	-5	-7.2	-6.8	-6
YGJ750	-5	-5.4	-3.7	-6.3	-4.2	-4.8	-4.3	-4.3	-5	-5.4	-5.3	-5.1	-4.8	-3.9	-4.6	-5.5	-5.8	-5.2	-4.6	-5.2	-4.7	-5.7	-4.6	-4.9	-5.7	-3.9	-5.2	-5	-5	-5.4	-7.1	-4.4	-3.6	-5.6	-5.6	-3.9	-3.9	-4.2	-4.4	-5	-5.8	-4.3	-5.9	-5.4	-5.1	-5.2	-5.8	-6.2	-4.8
YGJ752	-7.1	-7	-5.3	-7.5	-5.2	-7.1	-5.3	-6.1	-6.8	-9	-7.9	-9.8	-6.1	-0.9	-4.9	-8.1	-8.2	-7.5	-6.8	-8.5	-5.7	-7.4	-5.2	-5.8	-8.1	-5.1	-6.2	-5.2	-6.3	-8.3	-4.5	-5.4	-4.8	-8	-7.6	-8.8	-5.4	-5.3	-6.2	-5.3	-8.6	-6.1	-8.5	-6.9	-7.2	-5.9	-7.8	-8.5	-7.5
YGJ753	-4.7	-5.2	-3.8	-5.9	-4.1	-5.9	-4	-4.5	-5	-7	-5.9	-6.3	-4.5	-5.8	-3.9	-5.5	-6.1	-5.3	-4.8	-6	-4.7	-4.7	-4	-4.4	-5.8	-3.9	-5.3	-4.4	-5	-6.4	-6.9	-4.2	-3.9	-6	-5.2	-7.7	-3.6	-4.5	-4.4	-3.8	-6.8	-4.2	-7.1	-5	-5.1	-4.4	-6.1	-6	-5.3
YGJ754	-4.8	-5	-3.8	-5.6	-3.9	-6	-3.8	-4	-4.7	-6.5	-5.5	-5.7	-4.6	-5.3	-3.8	-4.9	-5.9	-5.1	-4.7	-5.7	-4.6	-4.8	-4.9	-4.2	-5.6	-3.7	-5.4	-4.4	-5.1	-6	-6.3	-3.9	-4	-5.6	-4.8	-6.9	-3.5	-4.2	-4.4	-3.8	-6.3	-4.2	-6.3	-5	-5	-4	-5.8	-5.2	-4.9
YGJ755	-4.6	-5.3	-4	-6.5	-4.1	-4.2	-3.7	-4.4	-5.3	-5.9	-5.5	-5.7	-4.3	-4.1	-3.8	-5.1	-6.5	-5.8	-4.1	-5.2	-4.2	-4.6	-5.2	-4.5	-4.2	-3.9	-5.6	-4.5	-5	-6.2	-7.5	-3.7	-3.4	-5	-5	-5.1	-3.6	-4.1	-4	-3.7	-5.5	-4.6	-6.4	-4.3	-4.3	-4.5	-6.7	-5.8	-4.2
YGJ757	-6.4	-6.8	-4.7	-8.3	-4.9	-7.1	-5.6	-5.6	-6.6	-9	-7.7	-9.5	-6	-5.5	-4.6	-7.8	-8.6	-7	-6.9	-8	-6.1	-6.8	-5	-5.9	-6.7	-4.9	-6.5	-5.2	-5.7	-9.1	0.5	-6	-4.8	-8	-8	-8.7	-4.7	-5.5	-5.6	-5.6	-9	-5.6	-9.8	-7.6	-6.7	-6	-7.7	-9	-7.2
YGJ758	-6	-6.5	-4.5	-7.8	-4.3	-5.8	-4.6	-5.1	-7.3	-7.2	-6.9	-7.9	-5.3	-2	-4.9	-6.5	-8.1	-7	-5.2	-7.1	-5.3	-6.1	-4.4	-5.3	-6.1	-4.7	-6.3	-5	-6.2	-7.9	-9.6	-4.4	-4.6	-7.5	-6.5	-7.9	-4.3	-4.8	-5.3	-4.7	-7.6	-5.2	-7.8	-5.7	-5.8	-5.5	-8.4	-7	-5.7
YGJ760	-5.5	-6	-3.8	-6.4	-4.6	-4.9	-4.8	-4.4	-5.4	-5.5	-5.6	-6.4	-5.8	-4.6	-4.2	-6.8	-6.4	-5.8	-5.7	-6.1	-4.9	-6	-4.8	-4.6	-6.1	-4.3	-5.3	-4.7	-5.7	-6	-7.2	-4.8	-4.2	-6.4	-6.7	-5.6	-4.1	-4.6	-4.7	-5.3	-6.3	-5	-6.6	-6.1	-5.5	-5.5	-6.4	-6.1	-6
YGJ763	-7.4	-7.6	-4.7	-7.4	-4.8	-6	-4.4	-6.5	-7.9	-7.3	-8.8	-8.1	-5.8	2.5	-4.6	-7.1	-7.8	-7.8	-5.5	-7.6	-6.3	-6.6	-5.5	-6.2	-5.7	-5.3	-6.5	-5.6	-6.5	-7.5	-7	-5.1	-5.4	-7.9	-6.8	-1.9	-4.8	-5.8	-5.9	-5.2	-8.9	-6.3	-7	-6.6	-6.1	-5.6	-9.3	-9	-5.7
YGJ764	-4.4	-5.4	-3.8	-6.5	-3.8	-6.5	-4	-4.7	-5.8	-7.1	-6.1	-6.8	-4.3	-5.7	-3.9	-5.2	-6.4	-5.7	-4.8	-5.8	-4.6	-4.3	-4.5	-4.4	-5.8	-4.1	-5.7	-4.3	-4.8	-6.4	-7.6	-4.2	-3.7	-5.8	-5.1	-7.8	-3.7	-4.4	-4.1	-3.7	-7.1	-4.3	-6.7	-4.4	-5	-4.1	-6.5	-5.7	-4.3
YGJ765	-6.5	-6.5	-5.1	-8	-4.7	-7.6	-4.6	-5.4	-7.1	-7.7	-7.5	-8.7	-5.7	-4.2	-5.3	-6.9	-8.5	-7.1	-6.1	-7.5	-5.9	-6.1	-4.9	-5.5	-6.5	-4.9	-6.5	-4.9	-6.4	-8	-8.9	-5.1	-5.1	-7.1	-7	-9.1	-4.6	-5.7	-5.7	-5	-7.7	-6.1	-8.3	-6.4	-6.9	-5.4	-9	-7.3	-5.7
YGJ767	-3.1	-3.9	-2.7	-4.1	-2.8	-4.2	-2.5	-3.1	-3.5	-4.6	-3.7	-4.3	-2.7	-4.2	-2.7	-3.5	-4.1	-3.7	-3.3	-3.9	-3.1	-3	-3	-2.8	-3.6	-2.7	-4.2	-2.8	-3.8	-4.3	-4.8	-2.7	-2.3	-3.4	-3.4	-5.2	-2.4	-2.8	-3.4	-2.5	-4.5	-3.3	-5	-3.2	-3.3	-2.6	-4.2	-4.4	-3.2
YGJ768	-6.1	-6.9	-4.6	-8.2	-4.4	-6.5	-4.6	-5.2	-6.9	-7.6	-7.4	-8.1	-5.2	-5.5	-4.6	-6.9	-7.5	-7	-5.5	-7.1	-5.6	-5.7	-4.6	-5.5	-5.8	-4.9	-6.4	-5	-6	-7.2	-9	-4.5	-4.8	-6.5	-6.5	-7.9	-4.4	-5.3	-5	-5	-7.3	-5.8	-9.2	-6.2	-6.5	-5.2	-8.5	-7.5	-5.4
YGJ769	-5.3	-6.2	-4.1	-7.1	-4.1	-6.6	-4.2	-4.9	-6.6	-8	-6.8	-7.7	-4.9	-5.9	-4.1	-6.1	-7.1	-6.6	-5.4	-6.8	-5.2	-5.2	-4.3	-5.4	-6.3	-4	-6.3	-4.8	-5.7	-7.6	-8.5	-4.5	-4.4	-6.3	-5.9	-9.4	-4.1	-4.7	-5	-4.1	-7.5	-5	-8.1	-5.6	-5.5	-4.6	-7.7	-6.4	-4.7
YGJ771	-7.6	-7.6	-4.7	-7.3	-5.6	-8.1	-4.2	-6.3	-8.4	-7.7	-8.9	-8.6	-6.1	13.4	-4.7	-9	-8	-7.4	-5.7	-8.3	-6	-6.3	-5.4	-6.1	-8	-5.2	-6.6	-5.1	-5.6	-8.8	9.1	-6.2	-4.4	-8.1	-7.2	6.2	-5.2	-5.2	-6	-5.6	-8.8	-5.7	-4.9	-6.3	-6.9	-5.4	-7.9	-9.7	-6
YGJ775	-7.4	-8.3	-5	-9.6	-6.1	-7.8	-5.4	-6.5	-8.7	-8.5	-10.2	-10.3	-7.9	33.4	-5.3	-9.9	-9.2	-8.7	-7.5	-10.2	-7.7	-7.3	-7	-6.7	-7.5	-5.7	-7.7	-6.5	-5.6	-8.5	21.8	-6.4	-5.4	-8.9	-7.6	9.2	-5.9	-6.3	-6.8	-6	-8.1	-6.5	-3.9	-8.1	-7.4	-6.6	-5.8	-11.1	-7.2
YGJ782	-5.3	-6	-4	-6.3	-4.4	-6.6	-4.2	-4.4	-5.4	-7.7	-6.2	-6.5	-5.1	-5.9	-3.8	-5.4	-6.2	-5.5	-5.6	-6.3	-5.7	-4.8	-4.7	-4.4	-5.7	-4.3	-5.6	-4.1	-5.3	-6.6	-7.6	-4	-4	-6.3	-5.4	-8.1	-3.8	-4.7	-4.6	-4	-7.5	-4.9	-7.1	-5.5	-5.5	-4.6	-6.3	-6	-5.1
YGJ783	-4	-4.8	-3.4	-5.1	-3.9	-5.3	-3.5	-4	-5.2	-6	-5.3	-5.5	-3.7	-5.2	-2.8	-4.6	-5.5	-4.7	-4.3	-5.1	-4.2	-3.8	-3.2	-4	-4.6	-3.4	-5.4	-3.5	-4.9	-5.7	-6.4	-3.2	-3.4	-4.7	-4.5	-6.8	-3.1	-3.8	-4.2	-2.9	-5.8	-4	-6.1	-3.9	-4.2	-3.8	-5.7	-5.4	-4.1
YGJ786	-7.9	-6.8	-4.4	-7.6	-4.6	-6.9	-4.6	-5.9	-8.3	-8.2	-8	-7.6	-5.6	12.9	-4.3	-8.3	-6.8	-8.1	-5.5	-8.7	-5.8	-7.1	-5.2	-5.9	-6.5	-4.7	-6.8	-5	-6.4	-6.4	-0.7	-5.1	-4.4	-8.5	-7.1	10.4	-5	-5	-5.6	-5.4	-9.8	-6.4	-3.5	-6.7	-5.4	-5.9	-6.8	-9	-6
YGJ787	-7.2	-8	-4.6	-8.2	-5	-7.4	-4.3	-6.5	-8	-8.3	-8.7	-7.9	-5.9	10.3	-4.2	-8.1	-7.8	-8	-5.7	-8.7	-6.1	-6.3	-5.8	-6.4	-7.8	-5.2	-6.5	-5.5	-6.2	-8.4	5.5	-5.3	-5.1	-8.3	-7.5	1.7	-5	-5.6	-6.5	-5.7	-8.9	-6.9	-7.1	-6.9	-6.6	-6.1	-7.6	-8.9	-5.9
YGJ790	-5.5	-6	-4.1	-7.7	-4.1	-6.9	-4	-5.3	-6.7	-8	-6.6	-7.6	-4.8	-6.5	-4	-6.2	-8.1	-6.1	-5.3	-6.9	-5.3	-5.3	-5	-5.3	-5.7	-4.5	-6.3	-4.7	-6	-7.7	-8.7	-4.2	-4.2	-5.9	-6.1	-8.2	-4.1	-4.8	-5.6	-4.1	-7.6	-5.4	-8.2	-5.4	-5.4	-4.9	-7.6	-6.5	-5.2
YGJ791	-6.8	-7	-4.7	-7.4	-5.1	-6.7	-4.4	-5.5	-7	-8.6	-7.9	-8.2	-5.6	-2.4	-4.7	-7.1	-7.8	-7.3	-6.4	-8.2	-5.5	-6.4	-5.2	-5.9	-6.5	-4.8	-7	-4.8	-6	-8	-7.6	-5.2	-4.8	-7.8	-7.3	-6.4	-4.4	-4.8	-5.6	-5.1	-7.8	-5.8	-9.2	-6.4	-6.8	-5.1	-8.2	-7.6	-6.1
YGJ792	-5.3	-4.9	-3.9	-5.9	-4	-6.1	-4.5	-4	-5	-6.8	-5.5	-6.1	-5.4	-6.5	-4.1	-5.5	-5.9	-5.7	-5.6	-5.8	-4.7	-6	-4.7	-4.5	-6	-3.9	-4.7	-4.4	-5.1	-6	-5.9	-4.4	-3.8	-5.8	-5.8	-6.9	-4	-4.7	-4.5	-4.7	-6.6	-4.4	-6.2	-6.1	-5.6	-4.9	-5.8	-5.4	-5.8
YGJ799	-7	-6.5	-4.8	-8	-5.3	-7.1	-5.7	-6.3	-7	-8.4	-7.9	-9.2	-7	-5.9	-5.1	-7.9	-9.1	-8	-7.4	-8.4	-6.1	-7.1	-5.5	-6.2	-7.7	-5	-6.6	-5.7	-6	-9.1	1.7	-5.6	-5.2	-8.9	-8.1	-8.9	-5.1	-5.8	-6.4	-6.4	-9.4	-5.7	-10.5	-7.8	-6.6	-6.3	-7.8	-8.7	-8.2
YGJ809	-3.9	-4.4	-3.2	-4.4	-4	-4.6	-4	-3.7	-3.7	-4.8	-4.4	-4.7	-4.5	-5.1	-3.9	-4.8	-4.9	-4.2	-4.8	-4.9	-3.9	-4.9	-4.8	-3.9	-5.6	-2.9	-4.2	-4.3	-4.5	-5.1	-4.6	-3.9	-3.2	-5.7	-5.1	-5.3	-3.2	-4.3	-4.3	-4.2	-4.8	-3.6	-5.1	-5.1	-5	-4.6	-4.4	-4.4	-5.6
YGJ811	-5.3	-5.6	-3.8	-6.4	-4.5	-5.5	-5.2	-4.5	-4.9	-6	-6.3	-6.6	-6.1	-4.9	-4.8	-6.6	-6.7	-6.1	-6.1	-5.9	-5.2	-6.1	-5.1	-5.1	-6.4	-4	-5.4	-4.7	-6.1	-6.4	-6.9	-5.3	-4.2	-6.5	-6.4	-6.4	-4.3	-4.8	-5.1	-4.8	-6.8	-4.9	-6.6	-5.8	-5.7	-5.5	-6.5	-6.4	-5.8
YGJ812	-6.9	-8	-5.1	-8.3	-5.2	-7.7	-4.8	-6.3	-8.3	-6.9	-5.1	-9.6	-6.9	27.7	-5.1	-8.4	-8.5	-8	-6.6	-9.4	-6.2	-8.3	-6.1	-6.8	-7.2	-6	-7.5	-5.8	-6.9	-6	37.2	-6.6	-5.2	-9.7	-5.3	16.8	-5.8	-6.2	-7.7	-6.8	-8.3	-6.8	5.3	-8.1	-8.2	-6.1	-4.2	-12	-6.3
YGJ813	-6.5	-6.7	-4.5	-6.3	-4.7	-5.3	-5.1	-5.3	-6.6	-6.2	-6.8	-6.3	-5.3	0.1	-4.8	-6.8	-7	-6	-5	-6.5	-5.4	-6.3	-4.9	-5.6	-5.6	-4.6	-6.6	-5.4	-6	-5.4	-8.7	-4.5	-4.2	-6.9	-6.3	-1.6	-4.6	-5.5	-5.1	-5.1	-7.4	-5.4	-6.6	-5.8	-5.4	-5.4	-7.2	-7.9	-5.6
YGJ816	-6	-6.9	-5	-7.4	-4.4	-6.3	-5.2	-5.9	-6.5	-7.6	-7.2	-7.7	-5.8	-0.9	-5	-7.1	-7.9	-7	-5.7	-7.9	-5.6	-6.7	-5.2	-5.6	-6.6	-4.7	-7.2	-5.6	-6.1	-6.3	-8.7	-5.3	-4.8	-7.6	-6.8	-5	-5.1	-5.5	-5.3	-5.1	-8.1	-6.6	-7	-6.4	-5.9	-5.9	-9	-8	-5.9
YGJ817	-3.2	-3.1	-2.6	-3.5	-2.9	-3.7	-3.2	-2.7	-2.9	-3.6	-3.3	-3.8	-3.9	-4.1	-3	-3.6	-3.8	-3.5	-3.6	-4.1	-3.4	-3.9	-3.8	-3.3	-4.2	-2.4	-2.6	-3	-3.4	-3.8	-3.3	-3	-2.5	-3.8	-3.8	-3.7	-2.7	-3.1	-3.2	-3.4	-3.7	-3.2	-3.8	-4.1	-4.2	-3.4	-3.3	-3.7	-4.4
YGJ818	-4.3	-3.9	-3.2	-4.4	-3.1	-4.8	-3.6	-3.3	-3.7	-5	-4.4	-4.5	-3.9	-5	-3.7	-4.7	-4.5	-4.1	-4.1	-4.7	-4	-4.3	-4.1	-3.6	-4.8	-3.1	-4.3	-3.9	-4.1	-4.6	-4.6	-3.4	-3.3	-5.7	-4.9	-5.5	-3	-4.1	-3.7	-3.8	-5.5	-3.6	-4.8	-4.6	-4.4	-3.6	-4.5	-4.5	-4.9
YGJ819	-2.9	-7.8	-4.5	-7.6	-4.3	-5.1	-4.9		-4.9	-7.2	6.5	8.1	-5.1	113.6	-3.7	-7.6	-0.6	-4.8	3.4	-8.2	-7.8	-4.7	-5.8	-0.1	-4.6	-7	-6.3	-4.8	-6.1	8.6	112.6	-4.2	-4.7	-7	-5.1	80.7	-3.6	-4.1	-5.8	-3.2	-7.3		-0.4	17	-4.4	-4.9	12	36.5	10.1
YGJ820	-4.8	-5.6	-3.8	-5.7	-4.4	-5.9	-4	-4.7	-5	-6.8	-5.8	-6.1	-4.9	-6.6	-4.1	-5.6	-6	-5.5	-5.3	-5.8	-4.5	-4.9	-4.2	-4.2	-6.1	-3.6	-5.1	-3.9	-5.6	-6.9	-6.7	-4.5	-4	-5.8	-5.6	-7.4	-3.7	-4.3	-4.7	-4.6	-6.4	-4.4	-6.6	-5.5	-5.3	-4.5	-5.9	-6.5	-5.6
YGJ825	-6	-6.7	-4.4	-7.5	-4.4	-5.4	-4.6	-5.3	-7	-6.2	-7	-7.3	-5.1	-1.3	-4.6	-7.2	-7.6	-7.2	-5.4	-6.9	-5.3	-6	-4.7	-5.4	-5.6	-4.4	-6.5	-4.9	-5.8	-6.2	-9.8	-4.1	-4.5	-6.4	-7.4	-5.2	-4.6	-5.2	-4.8	-5.3	-6.9	-6.1	-7.4	-5.4	-5.4	-5	-8.3	-7.2	-5.6
YGJ827	-5.2	-6	-4.2	-7	-4.1	-4.8	-3.8	-4.9	-5.9	-6	-6.1	-7	-4.6	-4.7	-4.1	-6.1	-7.1	-6.7	-5.1	-6.2	-4.9	-5.2	-5.3	-4.8	-5.1	-4.1	-6	-4.5	-5.1	-6.9	-8.3	-4.1	-3.9	-5.8	-6.2	-6.3	-4	-4.6	-4.5	-4	-6.2	-5.1	-7.2	-5.2	-5.3	-4.7	-7.1	-6.1	-4.9
YGJ830	-7.2	-7.2	-4.8	-7.1	-5.1	-7.3	-5.3	-5.3	-7.5	-8.6	-8.5	-8.1	-6.1	1.6	-5	-8.4	-9.4	-7.4	-6.4	-7.7	-6.3	-7.7	-5.4	-6	-7.2	-5	-6.7	-5.8	-6.4	-7.7	-0.3	-5.4	-5	-9	-8.2	-2.9	-5.1	-5.5	-6.4	-6.1	-8.4	-6.3	-6.7	-7	-6.7	-6.3	-8	-8.8	-6.7
YGJ833	-6.8	-7.3	-5.2	-7.8	-5.7	-7.6	-5.8	-6.5	-7.6	-8.6	-8.1	-9.2	-6.9	0.6	-5.8	-9.1	-9.5	-8.3	-7	-9.9	-6.5	-7.9	-6.2	-6.3	-7.6	-5.4	-7.6	-5.9	-6.4	-10.5	2.1	-6.7	-5	-9.2	-9.2	-3.3	-5.4	-5.9	-6.9	-6.5	-9.8	-7	-7.4	-8.2	-7.9	-7.1	-8.6	-9.6	-8.3
[truncated: 53 more columns]

## Sheet: Result_Normalization
	CCL18	DVL2	CX3CL1	MAPK12	PHF5A	BRD1	PRKAB1	TGFB3	INHBA	NT5E	CYP2C9	MAPK3	IL1B	EPAS1	LNX1	KAT6A	CDK2	IGF1R	ARHGDIA	EGFR	IFNA1	CAPN1	ITGA5	UBE2E1	RAC3	FOS	IL8	RNF4	LPA	CSNK1D	CYP2B6	HGS	MTA1	POFUT2	KAT5	CYP1A2	HIST1H4I	FN1	XIAP	RANGAP1	QSOX1	JUN	ABL1	PLAU	INPP5B	TREM2	CDK9	HCRTR1	GSN
YGJ002	0.80985	0.772266	0.760503	0.859182	0.424813	1.45269	0.99049	0.404896	1.11465	0.989763	0.701982	0.593098	0.109432	-0.0917782	-0.317933	0.219367	0.399801	0.856656	-0.273024	0.266695	0.815249	0.174165	0.547194	0.204055	0.817859	0.116156	1.12967	0	1.02757	0.60058	0.0266618	0.333355	0.503076	0.556134	0.234964	0.0696844	0.254782	0.954919	1.00005	-0.105582	0.794104	0.50718	0.417027	0.0550733	0.299559	0.113891	0.44431	0.455782	0.070081
YGJ003	0.32394	1.11549	0.912604	1.0935	0.991231	0.726345	0.565994	0.708567	0.975317	0.989763	0.701982	0.647016	0.766027	-0.0611854	0.476899	0.731223	0.799602	1.01241	0.546048	0.666737	0.815249	0.522496	0.273597	0.918249	-0.204465	0.813093	1.41208	0.536194	0.685047	0.540522	0.0799854	0.777828	0.754615	0.764685	0.626571	0.0580703	0.764345	0.272834	0.555585	0.316747	0.661754	1.01436	0.62554	0.16522	0.599118	0.911126	0.691149	0.39067	0.140162
YGJ004	-0.97182	-0.514844	-0.304201	-0.468645	-1.13284	-0.453966	-0.707493	-1.01224	-0.626989	-0.989763	-0.40949	-0.485262	-1.09432	-0.183556	-0.794832	-0.6581	-0.932869	-0.545145	-1.00109	-0.73341	-1.25005	-0.696662	-1.36799	-0.612166	-0.408929	-0.696937	-0.282416	-0.536194	-0.685047	-0.780754	-0.159971	-0.66671	-0.628846	-0.486618	-0.939856	-0.301966	-0.382172	-0.136417	-0.555585	-0.527911	-0.727929	-0.50718	-0.792351	-0.385513	0.099853	-0.227782	-0.937988	-0.227891	-0.630729
YGJ005	-1.29576	-1.28711	-0.760503	-0.781075	-1.13284	-1.18031	-1.55648	-1.61958	-1.18431	-1.20185	-1.34547	-1.40187	-1.75092	-0.122371	-1.27173	-1.53557	-1.999	-1.01241	-1.63815	-1.93354	-1.57615	-1.13208	-1.09439	-1.32636	-1.12456	-1.62619	-0.941388	-0.93834	-0.456698	-1.1411	0.74653	-1.33342	-1.50923	-1.73792	-2.193	-0.31358	-1.14652	-1.36417	-1.77787	-1.58373	-1.65438	-1.1158	-0.583838	-1.15654	-2.19677	-0.569454	-1.13546	-0.846452	-1.05121
YGJ006	-1.6197	-1.37292	-1.0647	-0.31243	-1.55765	-1.72507	0.282997	-1.01224	-1.8113	-0.565579	-1.16997	-0.80877	-1.75092	1.20841	-1.11276	-1.53557	-0.999502	-1.16817	-1.1831	-1.80019	-0.815249	-1.65457	-0.820791	-1.42839	-0.511162	-1.51003	-0.564833	-0.536194	-1.02757	-1.1411	1.1198	-1.44454	-1.00615	-1.94647	-1.64475	0.348422	-1.78347	-1.50059	-1.55564	-1.90048	-1.91909	-1.52154	-0.62554	-0.826099	-2.09691	-0.911126	-0.691149	-0.683673	-1.4717
YGJ008	-0.64788	-0.772266	-1.21681	-0.859182	-0.283209	-2.26983	-0.848991	-1.31591	-0.975317	-1.55534	-0.818979	-0.700934	-0.875459	-0.198853	-0.635865	-0.6581	-0.799602	-0.623023	-0.819073	-1.06678	-0.706549	-0.783745	-0.273597	-0.510139	-0.613394	-0.696937	-0.658972	-1.07239	-1.59844	-0.90087	-0.177745	-0.777828	-1.25769	-0.556134	-0.626571	-0.336808	-0.382172	-0.818502	-1.00005	-0.422329	-0.727929	-0.710052	-1.00086	-0.715953	-1.49779	-0.569454	-0.740517	-0.227891	-0.630729
YGJ009	-2.18659	-1.45872	-1.97731	-2.1089	-1.27444	-1.90666	-2.54697	-2.02448	-2.22929	-1.90883	-2.28144	-1.13228	-1.53205	1.96558	-2.06656	-2.04742	-1.26604	-2.02482	-2.09319	-2.06688	-2.44575	-2.61248	-1.09439	-3.16286	-2.35134	-2.78775	-2.44761	-2.01073	-1.14175	-0.840812	1.59082	-1.66677	-2.01231	-2.5026	-1.80139	1.52144	-1.78347	-1.36417	-2.11122	-1.47815	-3.57347	-1.82585	0.542135	-1.48698	-2.39647	-2.16392	0.592414	-1.36735	-1.33154
YGJ012	-0.728865	-1.28711	-1.82521	-1.0935	-1.41604	-1.3619	-0.848991	-2.22693	-1.25398	-1.83813	-1.46246	-1.56362	-0.547162	0.0917782	-0.953798	-1.16996	-1.7991	-1.79119	-1.1831	-2.00021	-1.35875	-1.30624	-1.77838	-1.02028	-1.84018	-1.74234	-0.941388	-0.804291	-0.342524	-1.38133	-0.0355491	-1.66677	-1.635	-1.2513	-1.40978	-0.487791	-1.65608	-1.77342	-1.66676	-0.739076	-1.38968	-1.82585	-1.25108	-0.715953	-1.89721	-1.59447	-1.18483	-0.976676	-1.33154
YGJ015	-1.0528	-0.514844	-0.760503	-1.40593	-0.849627	-0.635552	-1.41499	-0.911015	-1.39331	-0.848368	-0.994475	-1.67146	-1.53205	0.596558	-0.953798	-1.09683	-1.26604	-1.24605	-1.54714	-1.53349	-0.923948	-1.21916	-1.36799	-1.53042	-0.920091	-1.16156	-0.75311	-0.93834	-0.913396	-1.08104	0.29328	-1.44454	-1.38346	-1.59889	-1.17482	-0.31358	-1.4013	-1.22775	-1.11117	-1.16141	-0.99263	-1.82585	-0.45873	-0.605806	-0.299559	-0.911126	-1.18483	-0.520894	-0.490567
YGJ016	1.45773	2.3168	2.28151	2.34322	2.26567	2.08824	1.83948	1.72081	1.88097	2.40371	1.69646	1.67146	1.75092	0.0688336	1.4307	1.75493	1.86574	2.18058	1.54714	1.73352	2.01095	1.56749	1.64158	1.42839	1.84018	1.74234	2.44761	2.01073	2.85436	1.8618	0.248843	1.55566	2.01231	1.52937	1.80139	0.348422	2.03825	1.50059	1.44452	1.47815	1.98526	2.33303	1.45959	0.936246	1.59765	1.93614	1.57977	0.911564	0.840972
YGJ017	-0.97182	-0.858073	-1.36891	-0.93729	-1.13284	-1.18031	-1.55648	-1.21469	-0.905651	-0.919065	-0.994475	-1.1862	-1.53205	-0.137667	-1.74863	-1.46245	-1.7991	-1.16817	-1.54714	-1.06678	-1.68485	-1.04499	-0.820791	-1.63244	-1.12456	-1.62619	-0.376555	-1.87668	-1.82679	-1.80174	0.0799854	-1.88901	-1.25769	-1.39034	-1.80139	-0.325194	-1.65608	-1.90984	-1.44452	-1.37257	-1.58821	-0.710052	-1.20938	-1.43191	-1.99706	-1.2528	-1.13546	-0.520894	-1.40162
YGJ019	-1.29576	-1.63034	-2.28151	-1.24972	-0.849627	-1.3619	-1.69798	-1.51836	-1.32364	-1.34325	-1.57946	-1.56362	-1.53205	0.0535373	-1.74863	-1.68181	-1.93237	-1.63543	-1.82016	-2.2669	-1.90225	-1.30624	-1.64158	-1.42839	-1.53348	-1.8585	-1.12967	-1.87668	-2.39766	-1.74168	0.399927	-2.88908	-2.01231	-2.01599	-1.95803	-0.267123	-1.52869	-1.90984	-1.44452	-1.26699	-1.72056	-1.31867	-1.45959	-1.43191	-1.99706	-1.02502	-1.28356	-0.846452	-1.82211
YGJ024	-0.080985	0	0.456302	0.156215	0.424813	0.363172	-0.141499	0.101224	0	0.282789	0.0584985	0	-0.218865	-0.122371	0.476899	-0.146245	-0.266534	0.155756	-0.273024	-0.133347	-0.0543499	0	-0.273597	-0.204055	0.408929	-0.232312	0.188278	0.402146	-1.14175	-0.120116	-0.0888727	0	0.125769	0.278067	-0.156643	-0.197439	-0.382172	0.409251	0.222234	0	-0.198526	0	-0.291919	0.0550733	0.299559	0.341672	-0.246839	-0.0325559	-0.280324
YGJ027	-0.566895	-0.772266	-0.608403	-1.48404	-0.283209	0.363172	0.141499	-0.607343	-1.18431	0	-0.467988	-0.107836	0.218865	0.0535373	-0.317933	0.292489	-0.466434	-0.856656	0.0910081	-0.200021	-0.489149	0	-0.410396	-0.510139	0.204465	-1.0454	-0.188278	-1.07239	-0.913396	0.060058	-0.275505	0.111118	-0.503076	-0.278067	0.313285	0.31358	-0.509563	-0.409251	-0.111117	0.105582	-0.0661754	-0.912924	-0.62554	0.16522	0.099853	0	-0.888621	-0.260447	0
YGJ037	0.566895	0.429036	0.304201	0.234322	0.708022	-0.181586	0.707493	0.404896	0.139331	-0.0706973	0	0.107836	0.547162	-0.0382409	0.635865	0.6581	0.266534	0.467267	0.546048	0.400042	0.16305	1.04499	0.410396	0.918249	-0.204465	0	0.188278	0.268097	0.114175	0	-0.0888727	0.555591	0.503076	0.278067	0.626571	-0.104527	0.636954	0.272834	0.666702	0.950241	0.264701	0.608616	-0.208513	0.440586	0.499265	0.797235	0.0493678	0.162779	0.70081
YGJ040	0.32394	0.257422	0.456302	0.31243	0.424813	0.181586	0.424496	0.202448	0.208996	0	0.175496	0.161754	0.656594	-0.08413	0.158966	0.584978	0.399801	0.233634	0.364032	0.333368	0.380449	0.522496	-0.273597	0.714194	-0.204465	0.348468	0.376555	0.536194	0.228349	-0.180174	-0.0444363	-0.111118	0.377307	-0.0695168	0.548249	-0.139369	0.382172	0	0.555585	0.633494	0.132351	0.50718	-0.0834054	0.110147	0.299559	0.455563	0.148103	0.227891	0.140162
YGJ051	-1.45773	-1.11549	-1.67311	-1.79647	-0.991231	-1.72507	-1.69798	-1.01224	-1.53264	-1.41395	-1.63796	-1.56362	-1.31319	-0.175908	-1.58966	-1.60869	-1.86574	-1.79119	-1.91117	-1.86686	-1.79355	-1.21916	-1.64158	-1.1223	-2.76027	-0.813093	-1.6945	-1.87668	-2.16932	-1.32128	-0.239956	-2.33348	-1.88654	-1.59889	-2.03636	-0.569089	-0.891735	-2.04626	-1.66676	-1.7949	-1.52203	-1.1158	-1.20938	-0.991319	-2.09691	-2.05003	-1.57977	-0.520894	-1.54178
YGJ054	-0.48591	-0.94388	-1.52101	-0.468645	0	0.544759	0.141499	-0.404896	-0.975317	0.282789	-0.467988	0.107836	0.109432	0.198853	0.317933	-0.292489	-0.466434	-0.389389	0.45504	0.133347	-0.380449	-0.174165	0.273597	-0.306083	0.408929	-0.580781	-0.75311	-0.134049	-0.228349	-0.120116	-0.239956	-0.111118	-0.377307	0.0695168	-0.391607	0.267123	-0.636954	-0.954919	0	-0.105582	-0.0661754	-0.202872	-0.667243	0	0.299559	-0.227782	-0.493678	-0.325559	0.210243
YGJ055	-0.80985	-0.686458	-0.912604	-0.31243	-0.566418	-0.272379	-0.99049	-0.809791	-1.04498	0.212092	-0.584985	-0.754852	-0.218865	0.290631	-0.317933	-0.219367	-1.46594	-0.545145	0.364032	-0.333368	-0.706549	-0.174165	0.136799	-0.510139	0.306697	-0.929249	-0.847249	-0.93834	-1.14175	-0.30029	-0.29328	0.111118	-0.377307	-0.278067	-0.234964	0.232281	-0.764345	-1.09134	0	-0.633494	-0.198526	-1.01436	-0.208513	0.0550733	0	-0.113891	-0.789885	-0.325559	0
YGJ061	-1.53871	-1.80195	-2.28151	-1.40593	-1.27444	-1.45269	-1.83948	-1.82203	-1.74164	-1.83813	-1.87195	-1.83321	-1.96978	0.0764818	-1.4307	-1.68181	-2.13227	-1.4018	-1.91117	-2.46693	-1.68485	-1.74165	-1.23119	-1.73447	-2.14688	-1.8585	-1.31794	-2.27883	-2.28349	-1.98191	0.710981	-2.11125	-2.26384	-2.22454	-2.193	-0.278737	-1.65608	-2.04626	-1.66676	-1.37257	-1.58821	-1.62298	-1.29278	-1.26669	-2.49632	-1.02502	-1.2342	-0.976676	-1.40162
YGJ063	-0.16197	-0.686458	0.152101	-0.781075	-0.141604	-1.18031	0.141499	-1.11346	-1.04498	-0.636276	-0.760481	-0.970523	-1.20376	-0.0764818	-0.794832	-0.950589	-0.866235	-0.934534	-0.819073	-1.06678	-0.923948	-0.783745	-0.95759	-0.816222	-1.32902	-0.813093	-0.376555	-0.134049	-1.48427	-1.02099	-0.239956	-1.11118	-1.00615	-0.903718	-1.25314	-0.325194	-0.254782	-0.682085	-0.888936	-0.316747	-0.794104	-0.710052	-0.875756	-0.275366	-0.798824	-0.455563	-0.789885	-0.227891	-1.1213
YGJ075	-0.32394	-0.429036	-0.304201	-0.781075	-0.991231	-0.544759	-0.848991	-0.404896	-0.278662	-0.424184	-0.350991	-0.80877	-0.984892	0.206501	-1.27173	-1.02371	-0.932869	-1.09029	-1.0921	-0.600063	-0.706549	-0.870827	-0.547194	-0.510139	-0.204465	-0.464624	0.0941388	0	-0.570873	-0.780754	0.0444363	-0.66671	-0.503076	-0.834201	-1.01818	0.0348422	-1.01913	-1.36417	-1.22229	-0.739076	-0.794104	-0.50718	-0.375324	-0.605806	-0.299559	-1.48058	-0.592414	-0.293003	-0.911053
YGJ077	-1.21477	-1.45872	-0.912604	-0.93729	-1.55765	-1.63428	-1.69798	-1.01224	-1.60231	-1.48464	-0.994475	-1.5097	-1.53205	0.16826	-0.794832	-1.38932	-1.86574	-0.934534	-1.0921	-1.46682	-1.57615	-1.21916	-0.95759	-1.42839	-1.32902	-1.74234	-1.12967	-1.34049	-0.570873	-1.32128	0.0444363	-1.44454	-1.635	-1.6684	-1.72307	-0.0929125	-0.891735	-1.637	-1.3334	-1.47815	-1.05881	-1.31867	-0.875756	-0.991319	-1.39794	-0.911126	-0.987356	-0.651117	-0.840972
YGJ079	-0.16197	0.171615	-0.608403	-0.781075	-0.141604	0.726345	-0.282997	0.101224	-0.0696655	0.424184	-0.175496	0.161754	0.109432	0.107075	-0.476899	0	-0.399801	-0.311511	0.364032	0.466716	-0.27175	-0.261248	0.273597	-0.102028	0.204465	0.116156	0.188278	-0.402146	0	0.420406	-0.151084	0.111118	0.125769	0	-0.234964	0.0580703	-0.382172	-0.409251	0.444468	-0.422329	0.397052	-0.202872	-0.0417027	0.0550733	-0.099853	-0.341672	-0.493678	0.0325559	-0.210243
YGJ085	-0.80985	-0.171615	-0.152101	-0.234322	-0.849627	0	-0.565994	-0.50612	-0.278662	-0.0706973	-0.40949	-0.26959	-0.218865	0.175908	0	-0.6581	-0.133267	-0.311511	-0.0910081	0.0666737	0.16305	-0.435414	0.547194	-0.306083	0	-0.464624	0.282416	-0.402146	0	-0.30029	0.151084	-0.444473	-0.251538	-0.556134	-0.861535	0.197439	-1.01913	-0.409251	-0.555585	-0.844658	-0.595578	-0.202872	-0.375324	-0.440586	0.199706	-0.341672	-0.394942	-0.325559	-0.280324
YGJ093	-0.80985	-0.600651	-0.456302	-0.702967	-0.708022	-0.272379	-0.707493	-0.607343	-0.76632	-0.141395	-0.760481	-0.754852	-1.42262	0.351816	-1.11276	-1.3162	-1.13277	-1.09029	-0.637056	-1.40015	-0.380449	-1.04499	-0.273597	-0.816222	-0.408929	-0.696937	-0.282416	-0.670243	-0.913396	-1.32128	0.58656	-1.33342	-0.503076	-1.11227	-1.56643	0.209053	-1.27391	-1.22775	-1.00005	-1.47815	-0.99263	-0.608616	-0.250216	-0.881173	-1.19824	-1.36669	-0.740517	-0.488338	-1.54178
YGJ094	-1.0528	-0.343229	-0.760503	0.156215	0.141604	0.0907931	0.282997	-0.809791	-1.04498	-0.0706973	-0.760481	0.323508	0.218865	0.611854	0	-0.219367	0.266534	-0.623023	-0.0910081	-0.133347	-0.597849	-0.348331	0.410396	-0.306083	0.511162	-0.464624	-0.470694	-0.268097	-0.685047	0.480464	-0.133309	-0.222237	-0.628846	-0.764685	-0.234964	0.476177	-0.891735	0.272834	-0.333351	-0.105582	-0.661754	-1.21723	0.62554	-0.0550733	0.499265	-0.569454	-0.345575	-0.325559	0.070081
YGJ099	-0.64788	-0.171615	-0.608403	-0.702967	-1.13284	-0.363172	-1.55648	-0.404896	-0.487658	-0.212092	-0.292493	-0.323508	-1.42262	0.0382409	-1.4307	-0.804345	-0.599701	-1.09029	-0.546048	-0.533389	-0.380449	-0.870827	-0.547194	-0.918249	-0.102232	-0.696937	0.0941388	-0.670243	-0.228349	-0.720696	0.0533236	-0.888946	-0.503076	-1.04275	-1.01818	0.162597	-1.27391	-0.409251	-1.3334	-1.26699	-0.463227	-1.21723	-0.333622	-0.715953	-0.599118	-1.70836	-0.543046	-0.39067	-0.911053
YGJ103	0	0.257422	-0.152101	-0.390537	-0.141604	-0.453966	-1.27349	-0.607343	0.139331	0.212092	-0.116997	-0.377426	-1.09432	-0.175908	-1.4307	-0.6581	-0.466434	-0.623023	-1.0921	-0.266695	-0.27175	-1.56749	-0.547194	-0.714194	-0.306697	-0.348468	0.847249	-0.536194	-0.114175	-0.480464	-0.0444363	-0.888946	-0.377307	-0.556134	-1.17482	-0.127755	-0.891735	-0.409251	-0.555585	-1.05582	-0.264701	-0.405744	-0.125108	-0.826099	-0.299559	-1.13891	-0.246839	-0.195335	-1.61186
YGJ104	-2.18659	-1.54453	-1.36891	0	-1.98246	-0.363172	-0.141499	-1.11346	-1.53264	-1.13116	-1.05297	0.323508	-0.43773	1.42256	-0.794832	-0.6581	-0.1999	-0.233634	-0.364032	-0.466716	-1.79355	-1.56749	-0.273597	-1.42839	-0.204465	-1.97465	-1.12967	-1.60858	-1.25592	0.360348	-0.0444363	-0.777828	-1.25769	-1.94647	-1.0965	1.85825	-1.4013	-0.545668	-1.00005	-1.58373	-1.52203	-1.62298	0.583838	-0.715953	-0.99853	-1.13891	0.740517	-0.911564	-0.911053
YGJ114	-0.48591	-0.600651	-1.67311	-1.0935	-1.13284	-0.907931	-1.27349	-0.911015	-1.18431	-1.55534	-0.877478	-1.1862	-0.656594	0.145315	-1.4307	-0.804345	-1.73247	-1.09029	-0.819073	-1.0001	-0.706549	-1.13208	-0.547194	-1.02028	-1.02232	-0.929249	-0.75311	-1.07239	-1.02757	-1.32128	-0.0266618	-0.888946	-1.25769	-1.11227	-0.783214	-0.394878	-0.764345	-0.818502	-0.888936	-0.633494	-0.794104	-1.62298	-0.45873	-0.385513	-1.09838	-0.911126	-1.5304	-0.423226	-0.560648
YGJ115	0.64788	0.343229	0.304201	0.702967	0.141604	0	0.565994	0.50612	0.557324	0.212092	0.292493	0.431344	0.109432	-0.0611854	0.158966	0.804345	0.599701	0.778778	0.637056	0.533389	-0.0543499	0.522496	0.136799	0.714194	0	0.348468	0.282416	0.402146	0.685047	0.120116	-0.0266618	0.222237	0.377307	0.0695168	0.783214	-0.0348422	0.509563	0.409251	0.444468	0.422329	0.330877	0.304308	0.291919	0.440586	0	0.341672	0.246839	0.325559	0.350405
YGJ121	0.080985	-0.0858073	-0.152101	0	0	-0.544759	-0.424496	0	0.278662	-0.353487	-0.116997	-0.26959	-0.218865	-0.114723	-0.476899	0.146245	-0.1999	0.0778778	-0.182016	-0.400042	-0.16305	-0.261248	-0.410396	-0.306083	-0.613394	-0.232312	0	-0.402146	-0.456698	-0.360348	-0.0799854	-0.555591	-0.251538	-0.486618	-0.0783214	-0.243895	-0.382172	-0.272834	0.111117	0.105582	-0.0661754	0.202872	-0.375324	-0.275366	-0.199706	0	-0.246839	-0.0651117	-0.210243
YGJ128	0	0.0858073	0.152101	0.156215	0.283209	-0.272379	0	0	0.208996	0.282789	0.292493	0.107836	0.328297	-0.0917782	0.635865	0.584978	0.1999	0.311511	-0.182016	0	0.16305	0.0870827	1.36799	0.612166	0.102232	-0.116156	0.282416	0	-0.570873	0	-0.0888727	0	0.125769	0.0695168	0.469928	-0.0812984	0.509563	0	0.111117	0.527911	0.330877	0.304308	-0.208513	0.33044	0.399412	0.341672	-0.0493678	0.162779	-0.070081
YGJ132	1.45773	2.4026	2.12941	2.1089	1.27444	2.08824	1.41499	2.02448	1.53264	2.12092	1.52096	1.61754	1.09432	0.0458891	0.317933	1.75493	1.3993	2.02482	1.36512	1.33347	2.11965	1.13208	1.36799	1.42839	1.43125	1.39387	2.54175	0.93834	2.51184	1.74168	0.275505	1.11118	1.76077	0.973235	1.25314	0.301966	1.4013	0.954919	1.22229	0.422329	2.05144	2.02872	1.29278	0.660879	1.09838	1.13891	1.57977	0.911564	0.350405
YGJ137	0.97182	0.686458	1.0647	1.17161	0.708022	0.453966	1.41499	0.708567	0.696655	0.777671	0.760481	0.80877	1.31319	-0.00764818	1.27173	1.09683	0.999502	1.24605	1.00109	0.933431	0.923948	1.39332	1.64158	1.32636	1.02232	0.580781	0.658972	1.34049	0.685047	0.780754	0.0266618	0.888946	0.754615	0.695168	1.0965	0.0464562	0.891735	1.50059	0.777819	1.26699	0.794104	1.21723	0.417027	0.826099	0.99853	1.2528	0.592414	0.358114	0.840972
YGJ140	-0.97182	-0.171615	-0.456302	-0.546752	-0.283209	-0.998724	-1.27349	-0.708567	-0.626989	-0.636276	-0.467988	-0.485262	-0.875459	-0.122371	-1.11276	-0.877467	-0.666335	-0.778778	-0.910081	-0.666737	-1.03265	-1.21916	-1.09439	-0.714194	-0.920091	-0.580781	0	-0.670243	-1.14175	-0.780754	-0.0355491	-0.888946	-0.628846	-0.973235	-1.33146	-0.255509	-0.509563	-0.682085	-1.11117	-0.844658	-0.529403	-0.811488	-0.708946	-0.660879	-0.798824	-1.48058	-0.493678	-0.195335	-1.4717
YGJ142	-0.728865	-0.686458	-0.608403	-1.17161	-0.424813	0.0907931	-1.13199	-0.607343	-0.696655	-0.636276	-0.818979	-0.754852	-1.09432	0.16826	-1.4307	-1.24308	-0.732968	-1.24605	-1.0921	-1.13345	-0.380449	-1.04499	-1.09439	-1.22433	-1.53348	-0.929249	-0.282416	-0.804291	-0.114175	-0.60058	0.257731	-1.33342	-0.125769	-0.903718	-1.40978	0	-0.764345	-0.954919	-1.22229	-1.47815	-0.661754	-0.50718	-0.166811	-0.715953	-0.798824	-1.13891	-0.493678	-0.423226	-1.82211
YGJ144	-0.566895	-1.11549	-1.36891	-0.93729	-1.27444	-1.3619	-0.99049	-0.809791	-0.626989	-1.83813	-0.818979	-1.02444	-0.656594	-0.145315	-2.06656	-0.804345	-0.932869	-0.856656	-1.1831	-0.600063	-0.706549	-0.870827	-0.273597	-0.510139	-2.45358	-1.0454	-0.75311	-1.20644	-1.14175	-1.32128	-0.177745	-1.00006	-1.38346	-0.834201	-0.861535	-0.418106	-0.764345	-1.36417	-1.00005	-0.633494	-1.58821	-0.608616	-1.04257	-0.660879	-1.29809	-1.36669	-0.789885	-0.618561	-0.420486
YGJ147	0.728865	1.11549	1.36891	0.62486	1.13284	0.907931	0.848991	0.809791	0.835986	1.06046	0.760481	0.754852	0.109432	-0.0611854	0	0.584978	0.932869	0.856656	0.364032	0.800084	1.03265	0.261248	0.95759	1.02028	0.715626	0.813093	1.12967	1.07239	1.02757	0.60058	0.0622109	0.333355	0.503076	0.625651	0.469928	0.0812984	0.764345	0.682085	0.888936	0.527911	0.926455	1.01436	0.500432	0	0.898677	0.797235	0.641781	0.358114	0.210243
YGJ154	-0.32394	-0.257422	0	-0.702967	-0.708022	-0.272379	-0.707493	-0.404896	-0.208996	-0.706973	-0.292493	-0.26959	-0.656594	-0.145315	-0.317933	-0.365611	-0.466434	-0.311511	-0.546048	-0.200021	-0.16305	-0.435414	-0.683993	-0.204055	-0.408929	-0.464624	-0.470694	0	-1.25592	-0.480464	-0.124422	-0.777828	-0.628846	-0.486618	-0.469928	-0.139369	-0.636954	-0.545668	-0.555585	-0.739076	-0.397052	-0.101436	-0.45873	-0.16522	0.199706	-0.569454	-0.543046	-0.0651117	-0.70081
YGJ160	-1.78167	-1.54453	-1.52101	-1.56215	-2.12407	-0.544759	0	-2.02448	-1.74164	-0.282789	-1.81345	-1.02444	-2.07922	2.24092	-1.27173	-1.82806	-0.999502	-1.94695	-0.45504	-1.66684	-2.11965	-2.08999	-1.50478	-1.53042	-0.715626	-3.13621	-1.03553	-0.93834	-1.14175	-0.720696	2.95057	-2.88908	-2.13807	-2.01599	-1.01818	2.53187	-2.29303	-1.90984	-2.00011	-1.68932	-0.595578	-1.21723	0.333622	-0.881173	-1.79735	-1.2528	-1.2342	-1.04179	-0.350405
YGJ163	-0.80985	-0.94388	-0.912604	-0.62486	-0.141604	-0.0907931	-0.141499	-0.708567	-0.417993	-0.353487	-0.584985	-0.53918	-0.984892	-0.183556	-0.794832	-0.6581	-0.732968	-0.623023	-0.819073	-0.600063	-1.03265	-0.261248	-0.547194	-0.408111	-0.511162	-0.696937	-0.188278	0	-0.913396	-0.360348	-0.177745	-0.888946	-0.880384	-0.278067	-0.626571	-0.209053	-0.382172	-0.409251	-0.222234	-0.422329	-0.330877	-0.405744	-0.62554	-0.275366	-0.299559	-0.455563	-0.691149	-0.227891	-0.490567
YGJ176	0.32394	-0.0858073	0.608403	-0.0781075	0.708022	1.54348	0.424496	0.50612	0.208996	1.34325	0.350991	0.700934	0.547162	0.145315	0.317933	0.219367	0.466434	0.778778	0.637056	0.666737	0.380449	0.174165	1.77838	0.510139	0.408929	0.580781	0.564833	0.93834	0.228349	0.120116	-0.0888727	0.333355	0.628846	0.278067	0.0783214	0.255509	-0.254782	0.682085	1.00005	0.527911	0.595578	0.50718	0.542135	0.440586	0.698971	0.569454	0.148103	0.195335	0.210243
YGJ184	-0.728865	0	0	-0.702967	-0.849627	-0.272379	-0.707493	-0.50612	-0.487658	-0.141395	-0.584985	-0.916605	-0.984892	0.229445	-1.74863	-1.02371	-0.666335	-1.63543	-0.910081	-1.13345	-0.706549	-1.39332	-0.820791	-0.816222	-1.73795	0.116156	-0.0941388	-0.268097	-0.456698	-0.960928	0.231069	-1.00006	-0.628846	-1.18179	-1.48811	0.0696844	-1.01913	-0.682085	-1.11117	-1.58373	-0.727929	-0.912924	-0.417027	-1.10147	-1.09838	-1.13891	-0.592414	-0.423226	-1.54178
YGJ203	-1.37674	-1.02969	-0.608403	-0.0781075	-0.566418	-0.363172	-0.707493	-1.11346	-1.67197	-0.282789	0.0584985	-0.215672	-0.218865	3.02868	-0.476899	0	0.266534	0.0778778	-0.0910081	-1.06678	-0.706549	-0.95791	-0.410396	-0.816222	-0.613394	-1.27772	-0.564833	-0.402146	-1.25592	0.660638	2.15961	-1.55566	-1.50923	-1.6684	1.95803	3.94878	-1.14652	-1.09134	-1.00005	-1.26699	-0.463227	-1.21723	4.25367	-0.605806	-1.29809	-1.13891	3.90006	-1.00923	-0.630729
YGJ205	-2.10561	-1.71615	-1.52101	-1.32783	-1.84086	-1.3619	-2.26398	-1.51836	-2.29896	0.0706973	-0.292493	-0.593098	-1.20376	3.62524	-2.54346	-0.950589	-0.666335	-1.32392	-1.00109	-2.33358	-1.79355	-2.26415	-1.50478	-2.14258	-1.02232	-1.8585	-0.564833	-1.74263	-1.94097	0.120116	3.11943	-2.22237	-2.26384	-2.36357	0.626571	3.89071	-2.42042	-1.36417	-2.11122	-2.32281	1.32351	-1.62298	3.96176	-1.15654	-1.79735	-2.27782	2.51776	-1.20457	-0.911053
YGJ215	0.32394	0.429036	-0.152101	0.31243	0.283209	1.2711	0.282997	0.202448	0.417993	0.706973	0.467988	0.754852	0.43773	0.0152964	0	0.438734	0.399801	0	0.819073	0.466716	0.489149	0.435414	-0.820791	-0.204055	1.02232	0.348468	0.75311	-0.268097	0.342524	0.180174	-0.0444363	0.333355	0.628846	0.486618	0.313285	0.209053	0	0.272834	0.444468	0.422329	1.05881	0.608616	0.166811	0.440586	0.599118	0.341672	0.197471	0.227891	0.70081
YGJ216	-0.32394	-0.343229	-0.760503	-0.546752	-0.424813	0.272379	-1.27349	-0.404896	-0.278662	-0.141395	-0.233994	-0.647016	-1.09432	0.0688336	-0.953798	-0.438734	-0.999502	-1.4018	-0.546048	-0.400042	-0.27175	-0.696662	-0.547194	-1.02028	-0.204465	-0.696937	-0.376555	-0.804291	-0.228349	-0.30029	0.0533236	-0.66671	-0.251538	-0.764685	-1.01818	0.104527	-0.891735	-0.682085	-0.777819	-0.844658	-0.463227	-0.710052	-0.0834054	-0.881173	-0.698971	-0.911126	-0.937988	-0.293003	-0.911053
YGJ230	-2.59152	-1.2013	-1.82521	-1.64026	-2.69049	-1.99745	-0.424496	-2.63182	-1.95063	-0.989763	-1.63796	-1.34795	-0.766027	1.93499	-1.4307	-1.82806	-1.53257	-2.02482	-1.1831	-1.60017	-2.11965	-2.0029	-1.64158	-1.42839	-1.02232	-3.36853	-1.03553	-1.60858	-1.25592	-2.52244	1.99075	-2.33348	-2.26384	-2.0855	-1.33146	1.11495	-2.42042	-2.31909	-1.77787	-1.7949	-1.91909	-1.62298	-0.959162	-1.32176	-2.19677	-2.61949	-1.77724	-1.20457	-0.981134
YGJ235	-2.02462	-1.71615	-1.21681	-1.0154	-1.84086	-0.726345	0	-1.92325	-2.22929	-0.494881	-0.233994	-0.485262	-1.42262	2.77629	-1.4307	-1.68181	-1.13277	-1.47968	-0.910081	-1.46682	-1.35875	-1.74165	-0.683993	-1.32636	-0.920091	-1.39387	-1.12967	-0.804291	-0.799222	-0.660638	2.39067	-1.88901	-1.635	-2.36357	-2.03636	3.19387	-1.78347	-1.77342	-1.77787	-3.06189	-1.52203	-1.4201	2.46046	-0.991319	-2.09691	-1.36669	1.08609	-0.94412	-0.770891
YGJ247	-1.13379	-0.600651	-0.912604	-0.702967	-0.991231	-0.817138	-0.99049	-1.31591	-0.76632	-0.282789	-1.11147	-0.593098	-1.96978	0.359465	-1.4307	-1.24308	-0.732968	-1.01241	-1.27411	-1.20013	-1.35875	-1.39332	-0.683993	-1.32636	-1.53348	-1.27772	-0.376555	-1.20644	-1.25592	-0.540522	0.568785	-1.55566	-1.00615	-1.32082	-1.80139	0.37165	-1.78347	-1.36417	-1.22229	-1.26699	-1.19116	-1.1158	-0.291919	-1.43191	-1.19824	-1.48058	-0.394942	-0.651117	-1.75202
YGJ253	-2.02462	-1.71615	-1.21681	-1.0154	-1.98246	-1.45269	-0.848991	-2.1257	-2.08996	-1.13116	-2.45694	-1.29403	-1.20376	1.39197	-1.74863	-1.53557	-1.33267	-1.24605	-1.45613	-2.13356	-1.03265	-1.91582	-1.64158	-1.63244	-1.22679	-2.67159	-1.12967	-2.14478	-1.37009	-2.04197	1.56416	-2.00013	-1.50923	-2.01599	-1.95803	1.02204	-1.78347	-2.59192	-2.00011	-1.58373	-1.32351	-1.21723	-0.500432	-1.10147	-1.99706	-0.911126	-0.592414	-0.94412	-0.770891
YGJ255	-0.64788	-1.11549	-0.152101	-1.0935	0.141604	-1.63428	-0.565994	-0.911015	-0.905651	-0.989763	-1.22847	-1.13228	-0.766027	0.0764818	-1.11276	-1.53557	-0.999502	-1.16817	-1.27411	-1.40015	-0.597849	-1.04499	-0.136799	-0.510139	-2.35134	-0.232312	-0.376555	-0.402146	-1.02757	-1.26122	0.0355491	-1.44454	-1.00615	-1.04275	-1.95803	-0.278737	-0.764345	-1.637	-1.66676	-0.633494	-0.794104	-0.608616	-0.875756	-0.49566	-1.09838	-0.569454	-0.691149	-0.260447	-1.54178
YGJ260	-2.02462	-1.37292	-1.67311	-2.1089	-1.98246	-1.72507	-0.707493	-1.72081	-1.95063	-1.20185	-1.40396	-1.13228	-1.31319	1.75143	-1.58966	-1.68181	-1.1994	-1.55756	-0.728064	-2.5336	-1.90225	-2.0029	-1.64158	-1.1223	-2.76027	-2.20697	-0.470694	-0.93834	-1.02757	-0.240232	1.86633	-2.11125	-1.38346	-2.22454	-2.11468	1.96278	-2.03825	-2.18267	-2.11122	-2.11165	-0.661754	-1.72441	0.875756	-1.59713	-2.09691	-1.82225	-1.57977	-0.94412	-0.350405
YGJ275	0.64788	0.514844	0.152101	0.546752	-0.708022	-0.453966	0.424496	0	0.208996	-0.0706973	0.526487	0.26959	-0.109432	-0.0917782	0.476899	0.731223	0.1999	0.467267	-0.182016	0.333368	-0.16305	0.435414	0.136799	0.408111	0.613394	0.232312	0.376555	0.670243	0.685047	0.060058	-0.0533236	0.222237	0.377307	0.486618	0.391607	-0.0464562	0.127391	0.818502	-0.111117	0.211165	0.198526	0.101436	-0.0417027	0.16522	0.099853	0.341672	0.0493678	0.293003	0.070081
YGJ281	-0.242955	-0.171615	-0.608403	-0.156215	-0.566418	0.544759	-0.707493	-0.303672	-0.208996	0.565579	-0.116997	0.215672	0	0.191205	-1.11276	-0.219367	-0.0666335	-0.0778778	-0.273024	0.400042	-0.16305	-0.95791	-0.136799	-0.306083	-0.920091	-0.464624	-0.470694	-0.804291	-0.342524	0.720696	-0.115534	-1.33342	-0.377307	-0.486618	-1.01818	0.511019	-0.636954	-0.272834	-0.111117	-0.633494	-0.0661754	-0.101436	-0.208513	-0.385513	-0.499265	-0.911126	0	-0.162779	0
YGJ291	0.32394	-0.0858073	0.304201	-0.546752	-0.141604	0.453966	0.565994	0.404896	0.208996	0.565579	0.233994	0.053918	0.109432	0.0152964	0	0.146245	-0.133267	0.311511	0.364032	0.333368	-0.0543499	0.174165	0.547194	0.102028	0.102232	0.348468	0.658972	0.93834	0.114175	0.240232	-0.0533236	0.111118	0.251538	0.139034	0	-0.0232281	0.127391	-0.409251	0.222234	0.105582	0.529403	-0.101436	-0.166811	-0.0550733	0.399412	0.455563	0	0.162779	0.280324
YGJ298	-1.0528	-1.54453	-1.21681	-1.32783	-1.27444	-1.72507	-1.55648	-1.31591	-1.53264	-1.34325	-1.05297	-1.56362	-1.53205	0.08413	-1.74863	-1.53557	-1.7991	-1.32392	-1.72915	-1.2668	-1.57615	-1.48041	-1.09439	-1.42839	-1.43125	-1.8585	-1.41208	-1.34049	-1.37009	-1.56151	-0.0266618	-1.11118	-1.635	-1.73792	-1.87971	-0.104527	-1.01913	-1.637	-1.77787	-1.68932	-1.32351	-1.31867	-0.667243	-0.936246	-1.19824	-1.02502	-0.987356	-0.911564	-1.05121
YGJ303	-1.45773	-2.23099	-1.67311	-1.71836	-1.41604	-1.63428	-1.83948	-1.61958	-1.8113	-2.40371	-1.69646	-1.88713	-1.64149	1.16252	-1.58966	-1.82806	-1.93237	-1.55756	-1.54714	-1.73352	-1.57615	-1.13208	-2.05198	-1.93853	-1.22679	-1.62619	-1.2238	-1.20644	-1.59844	-2.22215	1.06647	-2.22237	-2.51538	-1.94647	-1.40978	0.418106	-1.91086	-2.04626	-1.55564	-1.58373	-1.45586	-1.62298	-0.45873	-1.32176	-1.59765	-1.59447	-1.48103	-0.94412	-1.19138
YGJ320	-2.34856	-2.05937	-1.52101	-0.859182	-1.41604	-1.08952	-1.27349	-1.51836	-2.0203	-1.13116	-0.175496	-1.07836	-1.09432	3.44933	-1.4307	-1.90118	-1.86574	-1.32392	-1.91117	-2.2669	-2.01095	-1.48041	-1.64158	-1.53042	-1.63572	-1.8585	-0.75311	-1.74263	-1.59844	-0.720696	2.66618	-2.66684	-1.38346	-2.36357	-0.156643	2.74092	-2.03825	-2.18267	-1.55564	-2.74514	-0.794104	-1.72441	1.25108	-1.15654	-1.99706	-0.911126	1.87598	-0.911564	-0.280324
YGJ322	-0.080985	0.0858073	-0.152101	0.0781075	0.283209	-0.453966	0.424496	0.202448	0.278662	-0.141395	-0.233994	0	0.218865	-0.114723	-0.317933	0	0.1999	0	0	-0.133347	0.0543499	-0.261248	-0.410396	0.408111	-0.306697	0.232312	0	0.268097	0.114175	-0.060058	-0.0533236	-0.111118	0	-0.278067	0.0783214	-0.116141	0	-0.136417	0.444468	0.105582	-0.0661754	0.304308	-0.0417027	0.0550733	0	-0.341672	-0.0493678	0.0325559	-0.420486
YGJ324	0.566895	0.257422	0.304201	0.156215	0	0.272379	0.282997	-0.202448	0.0696655	0.212092	0.175496	0.323508	0.656594	-0.0229445	0.635865	0.511856	0.0666335	0.233634	0.273024	0.133347	0.27175	0.696662	1.36799	0.306083	0.715626	0.232312	-0.376555	0.268097	0.228349	0.180174	-0.0710981	0.222237	0.377307	0.417101	0.313285	0	0	0.409251	0.666702	0.316747	0.397052	0.304308	0.208513	0.385513	0.599118	0.569454	0.0493678	0.260447	0.70081
YGJ328	0.242955	0.0858073	-0.304201	0.390537	0	-0.181586	-0.424496	0.404896	0.348327	-0.212092	0.467988	0.26959	0	-0.0917782	0.158966	0.219367	0.333167	0.467267	0.0910081	0.333368	-0.0543499	0.0870827	-0.273597	0.306083	0.511162	0.116156	0.376555	0.134049	0.570873	0.180174	-0.0444363	0.111118	0.377307	0.278067	0.156643	-0.0696844	0.127391	0	0	0.105582	0.264701	0.202872	-0.0834054	0.220293	-0.399412	0	0.197471	0.162779	0.070081
YGJ333	0.728865	0.686458	1.52101	0.702967	1.13284	0.181586	1.27349	0.101224	0.348327	0.353487	0.175496	0.485262	1.20376	-0.0994264	1.58966	0.877467	0.533068	0.778778	0.637056	0.466716	0.489149	1.21916	1.23119	1.22433	1.02232	0.696937	0.75311	1.87668	0.342524	0.240232	-0.0622109	0.66671	0.503076	0.973235	0.704892	-0.0929125	1.14652	1.36417	0.666702	1.47815	0.794104	0.811488	0.125108	0.936246	0.898677	1.36669	0.197471	0.358114	0.490567
YGJ338	0.48591	0.686458	1.52101	0.702967	0.141604	0.726345	0.141499	1.21469	0.905651	0.282789	0.643484	0.323508	0	-0.08413	0.158966	0.438734	0.599701	0.778778	-0.364032	0.400042	0.923948	0	0.410396	0.408111	0.817859	0	1.03553	0	0.342524	0.480464	0.0622109	0.888946	0.377307	0.417101	0.234964	0.0348422	0.254782	0.409251	0.555585	0	0.926455	0.710052	0.417027	0.110147	0.599118	0.569454	0.592414	0.520894	0.070081
YGJ341	-1.53871	-1.28711	-1.36891	-1.87458	-1.69925	-0.726345	-1.55648	-1.31591	-1.32364	-1.06046	-1.52096	-1.5097	-1.64149	0.527724	-0.794832	-1.09683	-1.3993	-1.09029	-0.637056	-1.13345	-1.79355	-1.74165	-1.09439	-1.73447	-0.817859	-1.74234	-1.2238	-1.74263	-0.342524	-0.720696	0.675432	-1.88901	-2.38961	-2.22454	-1.01818	-0.0348422	-1.52869	-1.77342	-1.66676	-1.47815	-1.25733	-1.72441	-0.750648	-0.660879	-1.09838	-1.70836	-1.03672	-0.683673	-1.4717
YGJ351	0.32394	0.343229	0.608403	0.234322	0.283209	0.726345	-0.141499	0.50612	0.417993	1.13116	0.40949	-0.053918	0.109432	0.0994264	0.317933	-0.146245	-0.133267	0	0.546048	0.266695	0.0543499	-0.174165	0.547194	0.612166	0.715626	0.232312	0.941388	0.402146	-0.342524	0.120116	0.0355491	-0.111118	0.377307	0	-0.234964	0.104527	-0.382172	0.545668	0	0.105582	0.463227	0.101436	0.166811	-0.16522	0.099853	-0.113891	-0.0493678	0.130223	-0.210243
YGJ354	0.404925	0.686458	0.760503	0.390537	-0.566418	0.272379	0.424496	-0.50612	0	0.141395	0.116997	0.107836	-0.328297	-0.130019	0.635865	0.219367	0.266534	0.623023	0.0910081	0.0666737	-0.16305	0.348331	-0.410396	0.612166	0	0.464624	0.282416	0.402146	-0.114175	0.060058	-0.0977599	0.111118	0.125769	0.347584	0.313285	-0.162597	-0.127391	0.682085	-0.111117	0.633494	0.330877	0	-0.0834054	0	0.399412	0.455563	0.0987356	-0.0325559	-0.350405
YGJ356	-1.6197	-1.11549	-0.152101	-0.62486	-0.991231	-0.181586	-1.13199	-0.708567	-1.46297	-0.282789	-0.526487	-0.700934	-1.20376	3.26577	-0.953798	-0.877467	-0.266534	-0.233634	-1.54714	-1.53349	-1.79355	-1.39332	-0.95759	-1.32636	-0.817859	-1.27772	-0.941388	-0.93834	-0.685047	0.540522	2.73728	-1.66677	-1.00615	-1.87695	0.548249	2.48541	-1.14652	-1.22775	-1.22229	-1.26699	0.198526	-1.4201	4.83751	-0.826099	-1.09838	-1.2528	1.18483	-1.36735	-0.490567
YGJ358	-1.6197	-0.94388	-1.36891	-1.0154	-1.13284	-1.72507	-1.69798	-1.21469	-1.04498	-2.05022	-1.75496	-1.67146	-1.75092	-0.0382409	-1.4307	-1.3162	-2.13227	-1.16817	-1.1831	-1.46682	-1.35875	-1.65457	-0.410396	-1.22433	-1.32902	-1.51003	-1.41208	-1.34049	-1.25592	-1.92186	0.0710981	-1.88901	-1.635	-1.39034	-1.80139	-0.603931	-0.891735	-1.22775	-1.66676	-1.16141	-1.25733	-1.01436	-1.37619	-1.04639	-1.99706	-1.59447	-1.5304	-0.586005	-1.4717
YGJ361	1.37674	1.71615	1.82521	1.87458	1.98246	1.90666	1.55648	1.72081	1.74164	1.90883	1.46246	1.45579	1.09432	0.0305927	1.9076	1.53557	1.86574	1.71331	1.1831	1.40015	1.57615	0.95791	1.36799	1.22433	1.53348	1.39387	2.07105	1.20644	2.16932	1.38133	0.186633	1.33342	1.88654	1.32082	1.40978	0.243895	1.52869	1.36417	1.3334	0.950241	1.85291	1.82585	1.08427	0.605806	0.99853	1.48058	1.28356	0.748785	0.560648
YGJ363	0.566895	0.257422	0.456302	0.390537	0.708022	0.726345	0	0.607343	0.278662	0.706973	0.350991	0.107836	-0.109432	-0.0229445	-0.158966	0.219367	0.399801	0.467267	-0.546048	0.400042	0.380449	-0.174165	0.273597	-0.306083	0.511162	-0.116156	0.847249	0.134049	0.456698	0.420406	-0.00888727	0.111118	0.125769	0.347584	0.313285	-0.0116141	-0.127391	0.409251	0.222234	0	0.595578	0.405744	0.291919	0	0.199706	0.341672	0.197471	0.227891	-0.280324
YGJ369	0.48591	1.71615	0.760503	1.48404	-0.283209	1.18031	0.141499	1.31591	1.25398	1.27255	1.05297	1.07836	0.43773	-0.00764818	0.476899	1.16996	1.33267	1.24605	0.364032	1.13345	1.14135	0.696662	0.273597	0.612166	1.02232	0.929249	2.16519	0.536194	1.71262	1.1411	0.177745	0.333355	1.25769	0.903718	0.704892	0.220667	0.891735	0.409251	0.666702	0.211165	1.32351	1.1158	0.917459	0.0550733	0.099853	0.683345	1.2342	0.55345	-0.280324
YGJ373	-2.42955	-1.37292	-0.912604	-0.31243	-1.27444	-0.363172	-1.27349	-2.02448	-1.46297	-0.424184	-1.57946	0.161754	-1.20376	1.45315	-1.74863	-1.16996	-0.1999	-0.700901	-1.00109	-0.800084	-1.25005	-1.48041	-0.683993	-1.73447	-0.715626	-1.8585	-2.35347	-1.74263	-1.25592	0.30029	0.177745	-1.44454	-1.25769	-1.6684	-0.391607	1.13818	-1.65608	-1.22775	-1.22229	-1.58373	-1.78673	-2.13016	0.250216	-0.660879	-1.29809	-1.59447	-0.296207	-0.976676	-0.490567
YGJ377	-1.94364	-1.80195	-2.12941	-1.0154	-1.41604	-1.54348	-0.565994	-1.41713	-2.08996	-1.41395	-0.292493	-0.970523	-1.75092	3.15105	-1.27173	-1.46245	-1.46594	-0.623023	-1.72915	-2.20023	-2.01095	-2.26415	-1.77838	-1.42839	-1.22679	-1.97465	-1.12967	-1.87668	-1.14175	0.060058	2.58619	-1.88901	-2.38961	-2.36357	0.626571	2.69446	-1.91086	-1.77342	-1.22229	-1.7949	-1.12498	-2.13016	2.50216	-1.21161	-1.99706	-1.48058	-0.197471	-1.6929	-0.981134
YGJ384	-0.32394	0.772266	1.0647	0.468645	0.708022	0.363172	-0.424496	0.50612	0.835986	1.06046	0.526487	0.323508	-0.109432	-0.0535373	0	0.292489	0.399801	0.311511	-0.546048	0.200021	0.706549	-0.348331	0.273597	0.306083	0	0.348468	1.31794	0.402146	0.114175	0.180174	0.0266618	0.111118	0.503076	0.417101	-0.0783214	-0.0116141	0.127391	0.272834	-0.111117	-0.105582	0.727929	0.304308	0.250216	-0.220293	-0.399412	-0.341672	0.345575	0.293003	-0.911053
YGJ386	-3.07743	-1.37292	-2.12941	-2.1089	-1.98246	-1.81586	-1.55648	-2.63182	-2.22929	-1.41395	-0.935976	-1.77929	-2.18865	1.43021	-1.4307	-2.48616	-1.66584	-2.25846	-2.09319	-1.73352	-2.11965	-2.17707	-1.91518	-1.8365	-0.920091	-2.09081	-1.78864	-1.20644	-2.16932	-0.660638	1.52861	-2.66684	-1.76077	-2.85019	-2.11468	1.21948	-2.29303	-2.72834	-2.11122	-1.68932	-2.11761	-1.31867	-1.12597	-1.15654	-1.89721	-1.48058	-0.839253	-1.13946	-1.1213
YGJ395	1.70068	2.05937	1.21681	1.87458	1.13284	1.72507	0.424496	1.61958	1.53264	1.97953	1.40396	1.24011	0.656594	0.0229445	1.11276	1.24308	1.66584	1.63543	0.819073	1.13345	1.46745	0.435414	0.683993	1.02028	1.02232	1.0454	2.63589	0.402146	1.94097	1.56151	0.213294	1.00006	1.635	1.11227	0.939856	0.232281	1.14652	0.818502	0.888936	0.105582	1.65438	1.31867	1.16768	0.49566	0.399412	0.683345	1.28356	0.651117	0
YGJ396	-0.64788	-1.11549	0	0.234322	-0.849627	-0.272379	-1.69798	-0.50612	-0.417993	0.0706973	-0.40949	-0.700934	-1.20376	0.864244	-1.27173	-0.511856	-0.533068	-1.01241	-0.728064	-0.466716	-0.380449	-1.74165	-0.410396	-0.510139	-0.408929	-0.696937	0.282416	-0.536194	-0.114175	-0.240232	0.515462	-0.444473	-0.125769	-1.11227	-0.704892	0.778142	-0.764345	-0.136417	-0.777819	-1.26699	-1.05881	-0.50718	-0.45873	-0.715953	-0.798824	-0.911126	-0.345575	-0.618561	-0.280324
YGJ399	0.404925	0.171615	0.608403	-0.234322	0.283209	0.453966	-0.141499	0.303672	0.208996	0.706973	0.526487	0.161754	0.218865	-0.00764818	0.158966	0.292489	0.1999	0.0778778	0.45504	0.333368	0.16305	0.174165	-0.273597	0.102028	0.408929	0.464624	0.941388	0.402146	0.685047	0.60058	-0.0444363	0.333355	0.377307	0.278067	0.234964	0.0348422	0.127391	0	0	0.211165	0.397052	0.202872	0.0834054	0.220293	-0.099853	0.455563	0.148103	0.130223	0.350405
YGJ403	0.80985	0.600651	0.912604	0.781075	1.13284	0.726345	1.55648	0.911015	0.696655	1.06046	0.701982	0.647016	1.31319	-0.0305927	1.4307	0.804345	1.13277	0.856656	0.819073	0.666737	1.35875	0.783745	2.18878	1.1223	0.920091	1.0454	0.847249	1.87668	1.02757	0.660638	0.0266618	0.333355	0.754615	0.695168	0.783214	0.0232281	1.27391	1.22775	1.22229	0.950241	0.99263	0.912924	0.291919	0.660879	1.39794	1.2528	0.592414	0.325559	0.280324
YGJ405	1.37674	0.94388	1.21681	0.93729	0.991231	0.453966	1.55648	0.607343	0.487658	0.777671	0.643484	0.754852	1.64149	-0.0458891	2.22553	1.53557	0.999502	1.01241	1.0921	0.866758	0.815249	1.48041	1.77838	1.53042	1.32902	0.813093	0.376555	1.87668	0.913396	0.720696	0.00888727	1.11118	1.13192	0.903718	1.48811	0	1.52869	1.637	1.00005	1.68932	0.794104	1.1158	0.291919	1.04639	1.19824	1.36669	0.543046	0.39067	1.19138
YGJ411	-0.48591	-0.343229	-0.760503	0	-0.991231	0.363172	-0.565994	-0.303672	-0.0696655	0.424184	0	0.431344	-0.43773	0.0688336	-0.953798	-0.292489	0.1999	-0.389389	-0.0910081	0.200021	-1.35875	-0.696662	-0.410396	-0.510139	-0.511162	-0.232312	-0.188278	-0.804291	-0.228349	0.420406	-0.159971	-0.444473	-0.251538	-0.486618	-0.704892	0.360036	-0.509563	-0.409251	-0.222234	-0.739076	0	-0.710052	-0.333622	-0.385513	-1.29809	-1.13891	0	-0.195335	-0.070081
YGJ414	-1.29576	-1.2013	-1.36891	-1.24972	-1.55765	-1.2711	-0.565994	-2.1257	-1.60231	-0.706973	-1.22847	-0.647016	-1.20376	1.4761	-1.11276	-0.950589	-1.13277	-1.47968	-0.819073	-1.73352	-2.22835	-1.48041	-1.50478	-1.22433	-0.817859	-1.51003	-0.847249	-1.20644	-1.02757	-0.420406	1.55527	-1.33342	-1.76077	-1.6684	-1.64475	0.905897	-1.4013	-2.04626	-1.77787	-2.21723	-1.45586	-1.21723	0.0834054	-1.04639	-2.19677	-1.70836	-1.08609	-0.879008	-0.911053
YGJ415	-0.64788	-0.686458	-0.760503	-0.62486	-0.424813	-0.907931	-0.99049	-0.911015	-0.76632	-0.989763	-0.994475	-0.700934	-0.656594	-0.16826	-0.317933	-0.731223	-0.732968	-0.700901	-0.910081	-0.73341	-0.597849	-0.609579	-0.273597	-0.408111	-1.02232	-0.929249	-1.03553	-0.536194	-1.71262	-0.840812	-0.168858	-0.888946	-1.38346	-0.556134	-0.783214	-0.348422	-0.891735	-0.682085	-0.777819	0.105582	-0.595578	-0.304308	-0.62554	-0.550733	-0.399412	-0.683345	-0.839253	-0.293003	-0.560648
YGJ416	1.21477	1.02969	1.36891	1.17161	0.991231	0.907931	1.41499	1.01224	0.557324	0.919065	0.877478	0.862688	1.75092	0.00764818	2.06656	1.46245	0.932869	1.24605	1.1831	1.06678	1.14135	1.65457	1.36799	1.53042	1.32902	0.580781	0.847249	1.60858	1.14175	0.780754	0.0533236	1.33342	1.25769	1.04275	1.40978	0.0812984	1.01913	1.637	0.888936	1.47815	0.727929	1.21723	0.542135	1.10147	1.59765	1.93614	0.641781	0.39067	1.54178
YGJ431	0.16197	0.171615	0	0	-0.283209	0.272379	-1.13199	0.101224	0.348327	0.494881	0	-0.161754	-1.53205	-0.183556	-0.158966	-0.219367	0	-0.467267	-0.910081	-0.400042	-0.27175	-1.21916	-0.547194	-0.408111	-0.102232	-0.580781	1.03553	-0.670243	-0.456698	-0.420406	0.0177745	-0.66671	0.125769	-0.278067	-0.548249	-0.0812984	-0.382172	-0.545668	-0.222234	-0.844658	-0.132351	0	-0.250216	-0.605806	-0.798824	-0.911126	-0.148103	0	-0.630729
YGJ440	0.404925	0.429036	0.608403	0.546752	-0.283209	1.18031	-0.282997	0.708567	0.417993	0.706973	0.40949	0.431344	-0.218865	0	-0.158966	0.219367	0.333167	0.545145	-0.637056	0.333368	0.0543499	0.0870827	0.273597	0.102028	0.408929	-0.116156	0.75311	0	0.342524	0.540522	-0.0533236	0.222237	0.503076	0.486618	0	0.0348422	0	0.272834	0	0.211165	0.661754	0.405744	0.166811	0.16522	0.599118	-0.455563	0.197471	0.260447	-0.140162
YGJ448	1.70068	1.71615	1.52101	1.64026	1.27444	1.72507	1.27349	1.31591	1.46297	1.76743	1.40396	1.29403	0.766027	0	0.476899	1.46245	1.73247	1.47968	0.910081	1.33347	1.46745	1.04499	0.683993	1.02028	1.32902	1.16156	2.25933	0.402146	2.16932	1.44139	0.19552	0.66671	1.635	0.764685	1.0965	0.243895	1.27391	0.682085	0.333351	0.105582	1.72056	1.62298	1.08427	0.440586	0.798824	0.797235	1.3823	0.651117	0
YGJ453	1.13379	1.37292	1.21681	1.0935	0.849627	1.2711	-0.282997	1.11346	1.18431	1.48464	0.994475	0.53918	0.109432	-0.00764818	0.635865	0.584978	0.799602	0.856656	0.0910081	0.800084	1.14135	0.0870827	-0.136799	0.612166	0.306697	0.813093	2.07105	0.536194	0.799222	0.90087	0.133309	0.222237	0.880384	0.695168	0.0783214	0.162597	0.764345	0.682085	0.666702	0.105582	1.19116	0.811488	0.708946	-0.16522	0.099853	0.227782	0.937988	0.423226	-0.280324
YGJ459	-0.566895	-0.514844	-0.608403	-1.24972	-0.566418	-0.272379	0.424496	-0.607343	-1.25398	-0.777671	-0.584985	-0.862688	-0.218865	0.0764818	-0.476899	-0.292489	-0.999502	-0.545145	-0.182016	-0.400042	-0.27175	0	0.273597	-0.408111	-0.102232	-0.580781	-1.03553	-0.536194	-0.799222	-0.960928	-0.275505	-0.111118	-0.754615	-0.347584	-0.313285	-0.185825	-0.636954	-0.954919	-0.555585	0	-0.397052	-0.608616	-0.500432	0	-0.199706	0.113891	-1.03672	-0.227891	0.210243
YGJ460	-0.32394	-1.02969	-0.608403	-1.0154	0.141604	0.726345	0.565994	-0.101224	-0.905651	0.777671	-0.233994	-0.916605	0	0.0917782	0	-0.584978	-0.599701	-0.623023	0.0910081	-0.333368	0.0543499	0	0.410396	-0.408111	0.511162	-0.348468	-0.282416	-0.536194	-0.114175	-0.060058	-0.266618	0	-0.251538	-0.20855	-0.783214	0.0348422	-0.764345	0.136417	0.222234	-0.105582	-0.132351	-0.50718	-0.0417027	0.385513	0.199706	-0.227782	-0.839253	-0.195335	0.140162
YGJ464	-0.97182	-0.686458	-0.760503	-1.0935	-1.27444	-0.907931	-1.55648	-1.72081	-0.696655	-1.34325	-1.05297	-1.1862	-1.96978	-0.145315	-1.58966	-1.53557	-1.3993	-0.778778	-2.18419	-1.40015	-1.57615	-1.30624	-0.820791	-1.32636	-1.73795	-0.813093	-0.658972	-0.93834	-0.570873	-1.56151	0.542123	-1.33342	-1.13192	-1.73792	-1.87971	-0.336808	-1.4013	-1.637	-1.44452	-1.90048	-1.52203	-1.1158	-1.25108	-1.32176	-1.19824	-1.48058	-0.740517	-0.488338	-2.31267
YGJ465	0.566895	0.686458	0	0.702967	0.283209	0	-0.424496	0.708567	0.696655	0.494881	0.40949	0.377426	0.328297	-0.0611854	-0.158966	0.511856	0.599701	0.389389	0	0.266695	0.489149	0.0870827	-1.09439	0.306083	-0.102232	0.116156	1.12967	-0.134049	0.456698	0.30029	0.0266618	0	0.377307	0.20855	0.313285	-0.0116141	0.254782	-0.136417	0.333351	-0.105582	0.595578	0.50718	0.250216	-0.16522	-0.099853	0.113891	0.345575	0.293003	-0.280324
YGJ466	0.48591	0.686458	0.608403	0.62486	0.424813	0.635552	-0.282997	0.809791	0.696655	0.282789	0.40949	0.431344	0.328297	-0.08413	0	0.6581	0.466434	0.545145	0	0.400042	0.489149	0.0870827	-0.547194	0.204055	-0.204465	0.464624	0.847249	0	0.685047	0.180174	0.0266618	0.333355	0.251538	0.556134	0.156643	-0.0348422	0.254782	-0.272834	0.333351	0	0.595578	0.50718	0.250216	-0.110147	-0.299559	0.341672	0.345575	0.227891	-0.210243
YGJ467	0.48591	0.514844	0.152101	0.31243	0.566418	-0.181586	0.848991	0.303672	0	-0.212092	0.175496	0.215672	0.656594	-0.0458891	0.794832	0.731223	0.1999	0.389389	0.728064	0.466716	0.489149	1.04499	0.547194	0.612166	0	0.232312	0.188278	0.268097	0.456698	-0.060058	-0.0977599	0.333355	0.503076	0.20855	0.783214	-0.150983	0.764345	0.545668	0.666702	1.05582	-0.0661754	0.608616	-0.166811	0.49566	0.399412	0.911126	0	0.162779	1.05121
YGJ468	0.97182	1.11549	1.0647	1.40593	1.13284	0.907931	2.40548	0.911015	0.626989	0.989763	0.877478	0.916605	1.31319	0	1.74863	1.16996	1.13277	1.16817	1.1831	1.13345	1.14135	1.39332	1.91518	1.63244	1.53348	1.16156	0.658972	1.87668	0.799222	0.780754	0.0355491	1.2223	1.38346	1.04275	1.33146	0.0580703	1.52869	1.637	0.888936	1.58373	0.86028	1.01436	0.375324	0.991319	1.09838	1.59447	0.691149	0.586005	0.981134
YGJ470	-0.890835	-0.772266	-0.608403	-1.0935	0.141604	0.544759	-0.141499	-0.50612	-0.835986	0.424184	-0.40949	0.053918	-0.218865	0.367113	-0.158966	0.0731223	-0.399801	-0.623023	0.637056	-0.133347	-0.0543499	-0.261248	0.683993	-0.204055	0.408929	-0.348468	-0.376555	-0.804291	-1.71262	0.30029	-0.355491	0.333355	-0.125769	-0.139034	0	0.209053	-0.382172	-0.682085	0.111117	0.105582	-0.0661754	-0.304308	0.208513	0.110147	0.599118	-0.227782	-0.740517	-0.293003	0.140162
YGJ471	0.890835	0.858073	0.608403	0.859182	0.708022	0.272379	1.83948	0.50612	0.208996	0.282789	0.526487	0.593098	1.09432	-0.0535373	1.74863	1.16996	0.599701	0.934534	0.728064	0.800084	0.0543499	1.39332	2.05198	1.02028	1.12456	0.464624	0.470694	0.93834	0.456698	0.720696	0	0.888946	1.00615	0.695168	1.17482	-0.0116141	1.14652	0.818502	0.222234	1.37257	0.463227	0.912924	0.125108	0.881173	0.99853	1.36669	0.394942	0.325559	0.911053
YGJ472	0.242955	0	0.152101	0.234322	-0.283209	-0.726345	0.424496	0.303672	0.208996	-0.141395	0.0584985	0.215672	0	-0.0917782	0.317933	0.511856	0.1999	0.311511	0.273024	0.133347	-0.16305	0.261248	0.547194	0.612166	-0.306697	0.232312	-0.0941388	0.804291	-0.685047	-0.180174	-0.0622109	-0.111118	0	0.139034	0.234964	-0.162597	0.127391	0.136417	0.111117	0.422329	0	0.304308	-0.166811	0.0550733	0.299559	0.341672	0.0493678	0	0.210243
YGJ473	0.728865	0.772266	0.304201	0.781075	0.283209	0	0.99049	0.303672	0.208996	0.141395	0.40949	0.431344	1.09432	-0.0688336	1.27173	0.877467	0.599701	1.01241	0.546048	0.600063	0.16305	1.39332	1.09439	1.22433	0.817859	0.116156	0.470694	0.93834	0.228349	0.420406	-0.0444363	0.66671	0.377307	0.486618	1.17482	-0.0464562	1.01913	1.09134	0.111117	1.37257	0.529403	0.811488	0.125108	0.771026	0.698971	0.797235	0.148103	0.260447	0.911053
YGJ474	0.48591	0.514844	0.152101	0.31243	0.566418	-0.181586	0.848991	0.202448	0	-0.212092	0.175496	0.215672	0.547162	-0.0382409	0.794832	0.731223	0.266534	0.389389	0.728064	0.466716	0.380449	1.04499	1.36799	0.612166	0	0.232312	0.188278	0.402146	0.342524	-0.060058	-0.0977599	0.333355	0.503076	0.20855	0.783214	-0.150983	0.636954	0.545668	0.666702	1.16141	-0.132351	0.608616	-0.166811	0.49566	0.299559	0.911126	0	0.162779	0.911053
YGJ475	0.48591	0.343229	0.152101	0.31243	0	0.453966	0.707493	0.404896	0.139331	0	0.292493	0.053918	0.547162	-0.0152964	0.317933	0.292489	0.266534	0.233634	0.0910081	0.466716	0.0543499	0.609579	-0.136799	0.204055	0.511162	0.116156	0.658972	0.134049	0.114175	0	-0.0977599	0.222237	0.251538	0.486618	0.391607	-0.0929125	0.509563	-0.136417	0.444468	0.422329	0.595578	0.710052	-0.208513	0.220293	0.399412	0.455563	0.246839	0.260447	0.630729
YGJ476	0.80985	0.686458	0.608403	0.156215	1.13284	0.635552	0.99049	-0.101224	0.208996	0.919065	0.40949	0.485262	1.20376	0.08413	0.794832	0.950589	0.1999	0.623023	0.910081	0.800084	1.03265	1.13208	0.410396	0.714194	1.02232	0.348468	0.376555	0.402146	0.685047	0.30029	-0.0622109	1.11118	0.754615	0.834201	1.01818	0.150983	0.636954	1.09134	0.888936	0.950241	1.12498	0.50718	0.250216	0.881173	1.19824	1.02502	0.0987356	0.293003	1.1213
YGJ477	0.728865	0.600651	0.760503	0.0781075	0.566418	1.54348	1.27349	-0.101224	0.417993	1.27255	0.526487	1.02444	1.31319	0.0458891	0.794832	0.804345	0.533068	0.467267	1.27411	1.0001	0.923948	0.696662	-0.273597	0	1.22679	0.696937	0.658972	0.268097	1.14175	0.60058	-0.0622109	0.555591	0.754615	0.903718	0.704892	0.383264	0.509563	0.409251	1.00005	0.527911	0.99263	0.811488	0.375324	0.660879	0.99853	0.569454	0.296207	0.293003	1.05121
YGJ479	0.16197	0.343229	0	0.234322	-0.424813	0.0907931	0.141499	0.50612	0.0696655	0	0.0584985	0.107836	0.328297	-0.114723	0.317933	0.146245	0.0666335	0.233634	-0.0910081	0.333368	0.0543499	0.0870827	1.09439	0.612166	0.102232	0.232312	0	0.804291	-0.685047	0.060058	-0.0977599	0	-0.125769	0	0.156643	-0.185825	0.254782	0.136417	0.111117	0.316747	-0.198526	0.304308	-0.208513	0.16522	-0.099853	0.227782	-0.0493678	0.130223	0
YGJ481	0.64788	0	0.304201	0.0781075	0.991231	1.08952	0.141499	0.202448	0	0.424184	0.292493	0.377426	0.766027	0.0611854	0.476899	0.731223	0.266534	0.389389	0.637056	0.533389	0.489149	0.95791	-0.273597	0.918249	1.02232	0.348468	-0.376555	-0.134049	0.228349	-0.180174	-0.124422	0.66671	0.628846	0.486618	0.704892	0.104527	0.509563	0.409251	0.777819	0.844658	0.727929	0.405744	0.0834054	0.771026	1.19824	0.797235	0	0.195335	0.981134
YGJ483	1.45773	1.63034	1.21681	1.71836	0.991231	1.3619	1.27349	1.21469	1.18431	1.83813	1.11147	1.29403	0.875459	0.0229445	0.476899	1.38932	1.5992	1.63543	1.00109	1.2668	1.57615	0.95791	0.547194	0.306083	0.817859	0.929249	1.88278	1.34049	1.82679	1.08104	0.19552	0.66671	1.38346	0.695168	1.17482	0.255509	1.01913	0.682085	1.00005	0.844658	1.45586	1.4201	1.08427	0.660879	0.898677	1.36669	1.2342	0.618561	0.210243
YGJ484	-0.242955	0.171615	0.152101	0.0781075	0	0.181586	0.282997	0.101224	0	-0.282789	-0.116997	-0.26959	-0.766027	0.351816	-0.158966	-0.6581	-0.399801	-0.233634	-0.45504	-0.333368	-0.489149	-0.783745	-0.136799	-0.714194	-0.204465	-0.464624	0.282416	-0.804291	0.228349	-0.180174	0.515462	-0.555591	-0.125769	-0.486618	-1.0965	0.150983	-0.254782	-0.272834	0.111117	-0.527911	-0.661754	-0.101436	-0.45873	-0.0550733	0	-1.59447	-0.246839	-0.325559	0
YGJ485	-2.10561	-1.88776	-1.97731	-1.32783	-2.26567	-0.817138	-0.282997	-2.1257	-2.29896	-1.06046	-1.22847	-1.67146	-1.31319	1.81262	-1.58966	-1.60869	-1.5992	-1.32392	-0.546048	-2.5336	-1.68485	-2.35123	-2.05198	-1.42839	-1.53348	-1.97465	-1.41208	-2.01073	-0.456698	-1.26122	2.78171	-2.22237	-1.76077	-2.15502	-0.861535	1.30077	-1.91086	-1.77342	-2.33346	-1.68932	-1.45586	-2.43446	2.21024	-0.715953	-1.79735	-1.2528	-0.296207	-1.04179	-0.280324
YGJ486	-0.32394	-2.05937	-1.36891	-1.40593	-2.40728	-1.08952	-0.424496	-1.21469	-1.88097	-1.27255	-2.22294	-1.56362	-0.656594	2.49331	-0.794832	-1.68181	-1.53257	-1.24605	-0.273024	-2.06688	-2.33705	-1.30624	-0.820791	-1.32636	-1.22679	-1.97465	-0.658972	-0.402146	-0.570873	-1.08104	2.36401	-2.55572	-1.25769	-1.73792	-0.626571	2.76415	-1.78347	-0.954919	-1.66676	-0.844658	-0.529403	-1.01436	-0.333622	-0.550733	-2.19677	-0.797235	-0.197471	-0.651117	0.911053
YGJ488	1.21477	1.54453	1.52101	1.40593	1.13284	1.18031	0.565994	1.41713	1.25398	1.34325	0.760481	0.916605	-0.218865	-0.0535373	0.635865	0.804345	1.13277	1.16817	0.0910081	1.06678	1.03265	0.348331	0.547194	0.612166	0.511162	0.813093	2.16519	0.670243	1.48427	1.02099	0.133309	0.111118	1.00615	0.695168	0.548249	0.197439	1.14652	0.682085	0.555585	0.105582	1.32351	1.1158	0.875756	0.110147	0.299559	-0.341672	1.13546	0.55345	-0.770891
YGJ489	1.45773	1.97357	1.36891	2.26512	1.55765	1.90666	1.83948	1.41713	1.74164	2.19162	1.46246	1.56362	1.31319	0.0382409	1.27173	1.68181	1.86574	1.94695	1.45613	1.46682	1.57615	1.39332	0.95759	1.1223	1.32902	1.39387	2.16519	1.47453	2.16932	1.32128	0.239956	1.33342	1.50923	0.973235	1.64475	0.301966	1.65608	1.09134	1.3334	1.37257	1.65438	1.92728	1.25108	0.936246	1.09838	1.93614	1.43167	0.781341	1.05121
YGJ490	-0.080985	-0.0858073	0	0.390537	0.283209	0.181586	-0.848991	0.303672	0.348327	0.0706973	0	0.215672	0.218865	-0.0764818	-0.317933	0.219367	0.266534	0.155756	-0.364032	0.200021	-0.16305	0	0.820791	0.306083	0.408929	-0.116156	-0.188278	-0.670243	0.114175	0.120116	-0.0533236	0	0.125769	0.278067	0	-0.127755	0.127391	0.272834	-0.111117	-0.527911	0.529403	0.101436	-0.125108	0.0550733	0	0.113891	0.197471	0.0651117	-0.280324
YGJ491	2.10561	2.4026	2.58571	2.34322	2.26567	2.633	2.40548	2.32815	2.0203	2.26231	1.81345	1.77929	1.96978	0.0994264	2.54346	2.12055	2.26554	2.18058	2.09319	2.13356	2.22835	1.82874	2.05198	2.24461	2.14688	2.09081	3.10658	2.41287	2.85436	1.74168	0.257731	1.88901	2.26384	2.01599	1.87971	0.37165	2.03825	2.31909	2.22234	1.7949	2.24996	2.23159	1.37619	1.37683	2.19677	2.05003	1.62914	1.00923	1.54178
YGJ495	0.48591	1.2013	0.760503	1.24972	0.991231	0.635552	0.707493	1.21469	1.11465	1.06046	0.877478	0.916605	0.766027	-0.0229445	0.635865	0.877467	1.13277	1.16817	0.637056	0.933431	0.706549	0.696662	0.136799	1.02028	0.204465	0.813093	1.31794	0.536194	1.02757	0.840812	0.0888727	0.444473	0.754615	0.556134	0.861535	0.0812984	0.891735	0.136417	0.666702	0.527911	1.05881	1.1158	0.667243	0.275366	0.698971	0.911126	0.740517	0.488338	-0.070081
YGJ496	1.78167	2.14518	2.43361	2.1089	2.69049	2.90538	1.98098	1.82203	1.60231	2.26231	1.57946	1.56362	1.96978	0.08413	1.74863	1.60869	2.06564	2.02482	1.63815	1.86686	2.01095	1.21916	2.05198	1.93853	1.73795	1.97465	2.73003	2.01073	2.85436	1.62157	0.222182	1.44454	2.01231	1.73792	1.72307	0.348422	1.91086	2.04626	2.22234	1.58373	2.11761	2.23159	1.33449	1.10147	1.6975	1.93614	1.48103	0.911564	1.33154
YGJ500	-0.728865	-0.514844	-0.912604	-1.64026	-0.849627	-1.2711	-1.13199	-0.911015	-0.905651	-1.76743	-1.22847	-1.61754	-1.20376	0.260038	-1.27173	-0.877467	-1.33267	-1.16817	-1.36512	-1.60017	-0.815249	-1.13208	-1.36799	-0.816222	-1.22679	-1.16156	-0.847249	-1.20644	-1.59844	-1.74168	0.177745	-1.66677	-1.38346	-1.52937	-1.0965	-0.592317	-1.52869	-1.50059	-0.888936	-1.16141	-1.45586	-1.1158	-1.37619	-0.991319	-1.49779	-2.05003	-0.987356	-0.455782	-1.05121
YGJ501	0.32394	-0.171615	-0.304201	0.0781075	0.566418	-0.363172	0.141499	0.303672	0.0696655	0.353487	0.175496	0.053918	0.766027	-0.08413	0	0.365611	0.1999	0.233634	0.182016	0.133347	0.489149	0.696662	-0.547194	0.510139	0.613394	0.348468	0	0.268097	0.228349	-0.240232	-0.142196	0.111118	0.377307	0.417101	0.313285	-0.104527	0.254782	0.136417	0.111117	0.527911	0.661754	0.304308	0	0.220293	0.599118	0.341672	-0.246839	0.0976676	0.630729
YGJ502	0.404925	-0.0858073	0.760503	0.468645	0.708022	-0.181586	2.68847	-0.50612	0.0696655	-0.0706973	-0.233994	-0.053918	1.42262	-0.08413	1.27173	0.511856	0.333167	0.389389	0.364032	-0.0666737	0.815249	1.13208	1.64158	0.612166	1.12456	0.348468	0	1.07239	0.456698	0	-0.133309	0.444473	1.00615	0.973235	0.156643	-0.209053	0.891735	0.954919	-0.333351	1.26699	0.330877	0.405744	-0.333622	1.15654	0.199706	0.113891	-0.0493678	0.0325559	1.05121
YGJ503	0.566895	0.514844	0.304201	0	0.566418	1.72507	0.99049	0.101224	0.278662	0.848368	0.292493	0.485262	0.875459	0.0152964	0.953798	0.731223	0.0666335	0.311511	1.0921	0.866758	0.923948	1.04499	-0.547194	0.510139	1.73795	0.348468	0.188278	-0.402146	0.456698	0	-0.0977599	0.888946	0.880384	0.764685	0.861535	0.0929125	0.254782	0.545668	1.3334	0.950241	0.794104	0.608616	0.166811	0.826099	1.19824	0.797235	-0.0987356	0.162779	0.981134
YGJ507	-0.890835	-1.02969	-1.21681	-1.71836	-1.27444	-0.998724	-0.848991	-1.21469	-1.32364	-2.6865	-1.52096	-1.61754	-1.42262	0.359465	-0.953798	-0.6581	-1.66584	-1.55756	-1.36512	-1.13345	-1.14135	-1.39332	-0.95759	-1.32636	-0.715626	-1.16156	-1.12967	-1.34049	-0.228349	-1.20116	0.577672	-2.11125	-1.88654	-1.6684	-1.25314	-0.487791	-1.01913	-1.637	-1.3334	-1.26699	-2.05144	-1.31867	-0.834054	-0.881173	-1.49779	-0.911126	-1.3823	-0.651117	-1.26146
YGJ509	-1.21477	-0.600651	0.152101	0	-0.566418	-0.726345	-0.707493	-0.404896	-0.76632	-0.424184	-0.233994	-0.485262	-0.43773	2.14149	0	-0.950589	-0.533068	-0.467267	-0.546048	-1.06678	-0.489149	-0.870827	-0.95759	-0.612166	-0.511162	-1.39387	-0.658972	-0.93834	-0.685047	0.30029	1.67081	-1.2223	-1.00615	-1.32082	0.704892	2.27636	-0.636954	-1.09134	-0.333351	-1.47815	-0.86028	-1.31867	2.12684	-0.605806	-0.99853	-0.227782	1.48103	-1.04179	-0.140162
YGJ510	-2.99644	-2.14518	-1.97731	-2.81187	-2.26567	-1.45269	-1.13199	-2.02448	-2.36863	-2.19162	-2.10595	-1.67146	-1.75092	2.34799	-1.11276	-2.55928	-1.7991	-2.33634	-1.0921	-2.60027	-2.33705	-2.69957	-1.36799	-1.8365	-1.53348	-2.43928	-2.16519	-2.41287	-1.02757	-1.02099	3.37716	-2.22237	-2.64115	-2.64164	-0.704892	2.18344	-2.42042	-2.04626	-2.44457	-2.21723	-1.25733	-1.82585	1.12597	-1.21161	-2.69603	-1.70836	-0.987356	-1.17201	-0.490567
YGJ514	0.16197	-0.0858073	1.0647	0.156215	0.991231	-0.272379	0.848991	-0.303672	0	0	-0.175496	-0.053918	0.875459	-0.0688336	0.635865	0	-0.0666335	0.155756	0.182016	-0.333368	0.380449	0.348331	-0.273597	0.102028	0.920091	0.116156	0	1.20644	0.114175	0.420406	-0.106647	0.111118	0.125769	-0.0695168	-0.469928	-0.278737	0.509563	0.272834	0	0.527911	0	0.304308	-0.208513	-0.16522	0.399412	0.911126	-0.148103	0	0.070081
YGJ515	1.6197	1.2013	1.67311	1.64026	1.27444	1.18031	2.12248	1.41713	1.18431	1.48464	1.16997	1.29403	1.86035	0.0229445	1.9076	1.60869	1.3993	1.71331	1.27411	1.40015	1.14135	1.74165	1.91518	1.73447	1.63572	1.16156	1.12967	2.01073	1.37009	1.26122	0.142196	1.2223	1.38346	1.11227	1.80139	0.139369	1.4013	1.77342	1.22229	1.7949	1.19116	1.4201	0.792351	1.15654	1.39794	1.93614	0.987356	0.651117	1.4717
YGJ516	0.566895	0.514844	0.456302	0.0781075	0.708022	0.726345	0.848991	0.50612	0.278662	0.494881	0.175496	0.215672	0.984892	-0.0535373	0.794832	0.584978	0.399801	0.389389	1.00109	0.533389	0.27175	0.696662	0.273597	0.408111	0.102232	0.464624	0.376555	0.93834	0.456698	0.360348	-0.0533236	0.66671	0.503076	0.695168	0.548249	0.0348422	0.509563	0.136417	0.777819	0.633494	0.529403	0.405744	0.125108	0.715953	0.698971	0.683345	-0.0493678	0.260447	0.840972
YGJ518	1.13379	1.28711	1.21681	1.48404	0.991231	0.907931	1.13199	1.41713	1.18431	1.34325	0.994475	1.02444	0.766027	0.00764818	0.476899	1.24308	1.26604	1.24605	0.910081	1.13345	0.815249	0.783745	0.95759	0.816222	1.02232	0.929249	1.31794	0.93834	1.48427	0.960928	0.142196	0.66671	1.25769	0.417101	0.861535	0.116141	1.01913	0.954919	1.11117	0.950241	0.926455	1.31867	0.792351	0.275366	0.898677	1.02502	0.987356	0.586005	0.350405
YGJ526	0.728865	0.772266	0.608403	0.468645	0.283209	-0.363172	0	0.607343	0.626989	0.565579	0.292493	0.323508	0	-0.0764818	0.635865	0.511856	0.533068	0.311511	0	0.600063	0.0543499	0.609579	1.36799	0.714194	-0.511162	0.116156	0.941388	0.670243	0.228349	0	0.0177745	-0.111118	0.377307	0.278067	0.313285	-0.0464562	0.382172	0.682085	0.333351	0.211165	0.463227	0.50718	0.0417027	0.16522	0.399412	0.341672	0.394942	0.0976676	0
YGJ527	-0.64788	-0.514844	-0.608403	-0.859182	-0.849627	0.181586	0	-0.607343	-0.835986	0.282789	-0.292493	-0.80877	-0.218865	0.16826	-0.476899	-0.584978	-0.799602	-0.311511	0.273024	-0.400042	-0.27175	-0.348331	0	-0.714194	0.511162	-0.348468	-0.376555	-0.536194	0	-0.180174	-0.186633	-0.111118	-0.125769	-0.278067	-0.313285	0.0580703	-0.764345	-0.682085	0	-0.422329	-0.132351	-0.710052	0.125108	-0.110147	0.299559	-0.455563	-0.641781	-0.227891	0.140162
YGJ528	-0.16197	-0.171615	0.912604	0.0781075	0.566418	-0.272379	0.424496	-0.404896	-0.139331	-0.353487	-0.350991	-0.431344	0.656594	-0.0229445	1.4307	0.292489	-0.0666335	0.0778778	0.45504	-0.466716	0.597849	0.261248	1.23119	0.816222	0.511162	0	0	1.07239	0.456698	-0.360348	-0.0977599	-0.111118	0.125769	0.486618	0.0783214	-0.255509	0.254782	1.09134	0.666702	0.844658	0.198526	-0.304308	-0.542135	0.771026	-0.199706	0.113891	-0.345575	-0.227891	0.210243
YGJ530	-0.242955	0.0858073	-0.456302	-0.62486	-0.283209	0.0907931	0	-0.202448	-0.696655	-0.282789	-0.526487	-0.377426	0.109432	0.0152964	0	-0.0731223	-0.399801	0	0.273024	-0.0666737	0.0543499	0.348331	0.683993	0	0.204465	-0.580781	-0.0941388	0	-0.228349	-0.180174	-0.177745	0	0	0.139034	0	-0.174211	-0.127391	-0.409251	-0.222234	0.422329	0.198526	-0.304308	-0.500432	0.16522	-0.099853	0	-0.839253	0	0.560648
YGJ531	-0.242955	0.0858073	0.304201	-0.93729	-0.566418	-0.363172	1.13199	-0.911015	-0.557324	-0.353487	-0.292493	-0.215672	0.656594	-0.0382409	0.635865	0.292489	-0.533068	-0.233634	-0.45504	-0.0666737	-0.0543499	0.435414	0.136799	-0.408111	0.408929	-0.813093	-0.376555	0.670243	-0.456698	-0.720696	-0.231069	0.111118	0.503076	0.625651	0.313285	-0.0580703	-0.509563	-0.272834	-0.555585	0.422329	-0.132351	-0.101436	-0.583838	0.110147	0.099853	-0.341672	-0.592414	0.0325559	0.70081
YGJ532	0.48591	0.429036	0.304201	0.468645	0.566418	-0.0907931	0.848991	0.101224	0.139331	-0.0706973	0.233994	0.161754	0.547162	-0.0688336	0.635865	0.731223	0.1999	0.467267	0.45504	0.466716	0.489149	0.870827	0.547194	0.408111	-0.204465	0.348468	0.376555	0.670243	0	-0.120116	-0.0533236	0.222237	0	0.417101	0.469928	-0.150983	0.509563	0.409251	0.777819	0.950241	0	0.405744	-0.0834054	0.33044	0.299559	0.569454	0	0.162779	0.490567
YGJ534	0.32394	0.686458	0.456302	0.156215	0.283209	0.726345	0.141499	0	0.208996	0.282789	0.292493	0.431344	0.656594	-0.0458891	0.953798	0.731223	0.333167	0.467267	0.182016	0.200021	0.597849	0.609579	1.23119	0.510139	1.22679	0.232312	0.470694	0.670243	0	0	-0.0710981	0.333355	0.377307	0.556134	0.391607	-0.0232281	0.509563	0.682085	0	0.633494	0.397052	0.50718	-0.0834054	0.49566	0.99853	0.683345	0	0.293003	0.630729
YGJ536	0.080985	0.343229	0.152101	-0.390537	0.424813	1.54348	0.707493	0	0.208996	0.706973	0.292493	0.485262	0.656594	-0.00764818	0.158966	0.219367	0.133267	0.389389	0.637056	0.600063	0.706549	0.435414	0.95759	0	1.02232	0.232312	0.188278	-0.670243	0.228349	-0.120116	-0.115534	0.555591	0.377307	0.764685	0.313285	0.127755	0	0.409251	1.00005	0.422329	0.595578	0.50718	0.0834054	0.550733	0.798824	0.569454	-0.148103	0.0651117	0.630729
YGJ538	0.32394	0.514844	0.456302	0.234322	-0.424813	0.181586	0.282997	0.303672	0.348327	-0.141395	0.233994	0.215672	0.328297	-0.0994264	-0.158966	0.511856	0.333167	0.155756	0	0.200021	0.27175	0.348331	0.136799	0.306083	-1.02232	-0.232312	0.282416	0.402146	0.685047	-0.180174	-0.0710981	0.222237	0	-0.139034	0.313285	-0.127755	0.254782	0	-0.111117	0.105582	0.198526	0.608616	-0.0834054	0.110147	0.199706	0.227782	0.197471	0	-0.140162
YGJ539	0.48591	0.600651	0.608403	0.859182	0.708022	0.453966	0.99049	0.809791	0.835986	0.706973	0.643484	0.754852	0.656594	-0.0535373	0.953798	0.584978	0.666335	1.01241	0.364032	0.866758	0.16305	0.609579	1.23119	0.816222	0.817859	0.813093	0.470694	0.670243	0.456698	0.360348	0.0444363	0.333355	0.503076	0.556134	0.391607	0.0116141	0.764345	0.545668	0.555585	0.211165	1.05881	0.608616	0.208513	0.49566	0.299559	0.683345	0.641781	0.293003	0.350405
YGJ540	-0.404925	-0.429036	-0.456302	-0.93729	-0.141604	0.544759	-1.27349	-0.303672	-1.18431	0.565579	-0.233994	-0.80877	-0.328297	0.183556	-0.476899	-0.438734	-0.399801	-0.778778	0	-0.400042	-0.27175	-0.174165	0.136799	-0.306083	0.204465	-0.580781	-0.564833	-0.402146	0.228349	0.30029	-0.186633	0.111118	-0.754615	-0.20855	-0.234964	-0.0696844	-1.01913	0	-0.222234	-0.105582	-0.330877	-0.405744	-0.0834054	0.0550733	-0.099853	-0.341672	-0.937988	-0.195335	0.210243
YGJ546	1.13379	0.600651	-0.152101	1.0935	0	1.45269	-0.424496	0.911015	1.11465	1.20185	0.760481	1.02444	-0.328297	-0.00764818	-0.317933	0.731223	0.799602	1.01241	-0.182016	0.466716	0.597849	0	-0.273597	0.612166	-0.204465	0.813093	1.60036	0.134049	0.799222	0.780754	0.106647	-0.111118	0.880384	0.695168	0.469928	0.116141	0.254782	0.409251	-0.111117	0	1.05881	0.710052	0.667243	0.275366	-0.798824	0	0.937988	0.423226	-0.420486
YGJ547	0.728865	1.97357	1.82521	1.64026	0.991231	1.54348	0.565994	1.31591	1.25398	1.69674	1.22847	1.29403	0.766027	0.00764818	-0.635865	1.38932	1.06614	1.55756	0.546048	1.20013	1.14135	0.696662	0	1.22433	0.920091	1.16156	2.07105	0.93834	1.82679	1.26122	0.204407	0.222237	1.38346	0.625651	1.01818	0.255509	1.14652	0.409251	1.00005	0.316747	1.72056	1.72441	1.08427	0.49566	0.898677	0.911126	1.13546	0.55345	-0.140162
YGJ553	0.80985	0.772266	0.760503	0.781075	0.708022	0.272379	0.99049	0.607343	0.557324	0.353487	0.40949	0.485262	0.875459	-0.0382409	1.11276	0.877467	0.666335	0.623023	0.910081	0.533389	0.489149	0.95791	0.683993	1.02028	0.306697	0.696937	0.282416	0.93834	0.913396	0.360348	-0.0355491	0.444473	0.628846	0.417101	0.939856	-0.0348422	0.764345	0.682085	1.11117	0.950241	0.330877	0.811488	0.250216	0.550733	0.898677	0.683345	0.394942	0.260447	0.630729
YGJ555	0.64788	1.2013	0.760503	0.93729	0.991231	0.544759	-0.282997	0.911015	1.11465	1.13116	0.818979	0.916605	-0.43773	-0.0688336	0.317933	0.731223	0.799602	0.934534	0	0.600063	0.380449	0	0	0.306083	-0.511162	0.464624	1.6945	0.268097	1.02757	0.660638	0.115534	-0.111118	0.754615	0.625651	0.469928	0.139369	0.636954	0.272834	0.222234	-0.105582	1.19116	0.710052	0.583838	-0.275366	-0.399412	0.341672	0.789885	0.260447	-0.560648
YGJ557	0.890835	1.71615	0.608403	1.64026	1.27444	0.817138	0.565994	1.31591	1.25398	1.62604	0.994475	1.13228	0.656594	-0.0305927	-0.158966	1.16996	1.1994	1.16817	0.819073	1.13345	0.815249	0.609579	0.820791	1.02028	1.12456	1.16156	1.88278	1.07239	1.71262	1.1411	0.142196	0.777828	0.880384	0.695168	0.939856	0.162597	0.636954	1.09134	0.777819	0.739076	1.25733	1.31867	1.00086	0.385513	0.898677	0.911126	0.987356	0.488338	0.140162
YGJ560	0.80985	1.11549	0.760503	1.17161	0.991231	0.726345	0.424496	1.31591	1.04498	1.06046	0.877478	0.80877	0.43773	-0.0229445	0.158966	0.950589	1.06614	1.01241	0.45504	0.73341	0.597849	0.261248	0.273597	0.816222	0.408929	0.696937	1.12967	0.268097	1.37009	0.660638	0.115534	0.444473	0.880384	0.347584	0.548249	0.104527	0.764345	0.682085	1.00005	0.422329	0.794104	0.912924	0.62554	0.110147	0.399412	0.911126	0.839253	0.455782	0
YGJ561	0.16197	-0.343229	0.456302	-0.0781075	-0.283209	-0.363172	0.848991	0.101224	-0.139331	0.282789	-0.0584985	-0.26959	0.875459	-0.0458891	0.794832	0	-0.133267	-0.0778778	0	0.133347	0.27175	0.435414	1.50478	0.204055	0.511162	0.464624	-0.188278	0.804291	0.228349	-0.480464	-0.159971	0.444473	0.377307	0.278067	0.313285	-0.127755	0.127391	0.136417	0.111117	0.527911	0.397052	0.202872	-0.166811	0.440586	0.798824	0.227782	-0.246839	0.130223	0.210243
YGJ562	-0.16197	1.45872	0.304201	1.0154	1.13284	0.453966	0.141499	1.11346	1.18431	1.13116	0.643484	0.754852	0.218865	-0.0535373	-0.635865	0.511856	0.799602	0.934534	0.273024	0.600063	0.815249	-0.0870827	-0.136799	0.816222	0.306697	0.929249	1.6945	0.536194	1.02757	0.780754	0.124422	0.111118	0.880384	0.625651	0.234964	0.104527	0.891735	0.136417	0.555585	-0.211165	0.86028	1.1158	0.708946	0	0.199706	0.569454	0.839253	0.423226	-0.70081
YGJ563	0.566895	0.772266	0.304201	0.62486	0.141604	0.181586	0.141499	0.50612	0.696655	0.282789	0.350991	0.53918	0.218865	-0.0764818	0.317933	0.731223	0.666335	0.545145	0.273024	0.466716	0.489149	0.261248	-0.820791	0.510139	-0.817859	0.116156	0.658972	0	0.685047	0.420406	0.0266618	0.111118	0.251538	-0.0695168	0.548249	-0.0116141	0.636954	0	0.222234	0.211165	0.264701	0.608616	0.250216	0.0550733	0	0.227782	0.44431	0.325559	-0.420486
YGJ564	0.48591	0.94388	0.760503	0.546752	0.141604	0.635552	-0.565994	0.809791	0.696655	0.353487	0.467988	0.323508	0.109432	-0.0535373	0.158966	0.365611	0.466434	0.467267	-0.364032	0.666737	0.489149	-0.0870827	-0.410396	0.714194	0	0.464624	1.03553	0	0.456698	0.540522	0.0533236	0.333355	0.503076	0.347584	0.156643	-0.0232281	0.382172	0.136417	0.333351	0.105582	0.330877	0.608616	0.250216	-0.110147	-0.299559	-0.113891	0.246839	0.325559	-0.070081
YGJ565	0.64788	0.94388	1.21681	1.0154	1.13284	0.907931	0.848991	0.708567	0.905651	0.919065	0.701982	0.754852	1.09432	0	0.635865	1.16996	0.866235	1.01241	0.819073	0.73341	0.706549	0.696662	0.547194	0.714194	0.408929	0.813093	1.2238	0.536194	1.25592	0.420406	0.0533236	0.555591	0.628846	0.764685	1.01818	0.0580703	0.764345	0.545668	1.00005	0.739076	0.86028	1.1158	0.45873	0.33044	0.698971	1.13891	0.592414	0.423226	0.420486
YGJ566	-1.94364	-1.63034	-1.67311	-1.56215	-0.991231	-2.08824	0	-1.51836	-2.15963	-0.989763	-1.93045	-1.24011	-1.20376	1.63671	-0.953798	-1.60869	-0.533068	-1.55756	0	-1.86686	-1.79355	-0.95791	-0.136799	-1.42839	-2.04465	-1.8585	-0.75311	-1.47453	-0.685047	-1.1411	1.58193	-1.44454	-1.25769	-1.52937	-1.87971	1.23109	-1.78347	-1.36417	-1.3334	-1.37257	-0.86028	-1.01436	0.959162	-1.15654	-1.79735	-0.341672	-1.33293	-1.1069	0.210243
YGJ567	-0.16197	0.171615	0.152101	-0.390537	-0.424813	-0.998724	0.424496	-0.101224	-0.76632	-0.424184	-0.584985	-0.862688	-0.547162	0.114723	-0.635865	-0.804345	-0.932869	-1.09029	-0.819073	-1.06678	0.0543499	-0.696662	0.136799	-0.204055	-1.22679	0.116156	0.0941388	-0.804291	0.570873	-0.540522	0.0444363	-0.888946	-0.125769	-0.973235	-1.17482	-0.116141	-0.382172	0.136417	-0.666702	-0.527911	0	-0.202872	-0.125108	-0.33044	-0.399412	-0.911126	-0.691149	-0.358114	-0.70081
YGJ568	-0.64788	-0.600651	-0.608403	-1.32783	-1.27444	-1.72507	-1.41499	-1.72081	-1.18431	-1.62604	-1.16997	-1.34795	-0.766027	0.0229445	-1.9076	-1.02371	-1.7991	-1.24605	-0.819073	-1.0001	-0.706549	-1.13208	-0.95759	-0.816222	-0.817859	-1.16156	-1.50622	-0.93834	-0.799222	-1.50145	-0.00888727	-1.00006	-1.635	-1.32082	-1.17482	-0.476177	-1.01913	-0.954919	-1.44452	-0.844658	-1.32351	-1.1158	-0.45873	-0.660879	-1.39794	-0.797235	-1.48103	-0.520894	-0.981134
YGJ569	0	0.0858073	1.0647	0	0.708022	-0.0907931	1.55648	0.404896	0.208996	0.141395	0.233994	-0.161754	0.875459	0.0458891	1.27173	0.292489	0.0666335	0.311511	0	-0.266695	0.0543499	0.696662	1.77838	0.510139	0.920091	-0.116156	0.470694	1.20644	0.228349	-0.060058	0	0.111118	0	0.278067	0.0783214	-0.162597	0.891735	1.09134	-0.333351	0.211165	0.727929	0.50718	-0.250216	0.660879	0.698971	0.569454	-0.148103	-0.0651117	0.490567
YGJ571	-1.0528	-0.429036	-0.760503	-1.48404	-0.991231	-1.18031	-1.55648	-1.31591	-1.04498	-1.41395	-1.11147	-0.970523	-0.766027	-0.0994264	-1.11276	-1.24308	-1.06614	-1.01241	-1.00109	-0.800084	-1.14135	-1.21916	-0.820791	-0.612166	-1.02232	-1.39387	-0.847249	-0.93834	-0.913396	-1.1411	-0.0622109	-1.00006	-1.38346	-1.04275	-1.48811	-0.499405	-0.764345	-0.954919	-1.00005	-0.422329	-1.05881	-0.811488	-0.834054	-0.991319	-0.798824	-1.13891	-1.03672	-0.55345	-0.70081
YGJ573	-1.0528	-0.600651	-0.912604	-1.0935	-0.708022	-0.907931	-1.13199	-1.01224	-0.696655	-1.27255	-0.818979	-1.40187	-1.53205	-0.183556	-0.794832	-1.02371	-1.33267	-0.856656	-1.36512	-1.13345	-0.815249	-0.95791	-0.273597	-1.22433	-0.920091	-1.39387	-0.941388	-1.60858	-0.342524	-1.1411	0.177745	-1.77789	-1.25769	-0.973235	-1.40978	-0.441334	-0.891735	-1.36417	-0.777819	-1.16141	-1.25733	-0.811488	-1.20938	-0.715953	-1.29809	-0.911126	-0.987356	-0.586005	-1.26146
YGJ575	0.64788	1.02969	0.608403	0.859182	0.424813	0.907931	0.565994	0.50612	0.76632	0.848368	0.584985	0.593098	0.656594	0.0305927	0	0.511856	0.866235	0.623023	0	0.466716	0.815249	-0.174165	0.136799	0.510139	0.511162	0.580781	1.12967	-0.134049	0.114175	0.540522	0.0177745	0.333355	0.628846	0.486618	0.391607	0.162597	0.509563	0.409251	0.333351	-0.105582	0.86028	0.608616	0.166811	-0.0550733	0.299559	0.113891	0.493678	0.325559	0.210243
YGJ576	-0.080985	-0.514844	-0.760503	-0.62486	-0.708022	-1.08952	0	-0.911015	-0.696655	-0.777671	-0.818979	-0.700934	0.109432	-0.0688336	-0.953798	-0.511856	-0.732968	-0.545145	-0.45504	-0.266695	-0.380449	-0.174165	-0.410396	-0.306083	-1.53348	-0.813093	-0.470694	-0.804291	-1.71262	-0.420406	-0.222182	-0.444473	-1.00615	-0.625651	-0.704892	-0.37165	-0.127391	-0.818502	-0.666702	-0.527911	-0.727929	-0.50718	-0.792351	-0.16522	-0.299559	-0.455563	-0.641781	-0.227891	0
YGJ578	-0.32394	-0.429036	-0.456302	-0.468645	-0.141604	-0.363172	-0.424496	-0.303672	-0.278662	-1.20185	-0.467988	-0.53918	-0.547162	-0.137667	-0.794832	-0.438734	-0.599701	-0.545145	-0.637056	-0.200021	-0.0543499	-0.522496	0.547194	-0.408111	-0.920091	-0.348468	-0.658972	-0.402146	-0.913396	-0.90087	-0.142196	-1.2223	-0.628846	-0.695168	-0.548249	-0.301966	-0.764345	-0.818502	-0.111117	-0.316747	-0.595578	-0.202872	-0.875756	-0.771026	-0.698971	-0.341672	-0.493678	-0.325559	-0.840972
YGJ580	0.404925	0.858073	0.456302	0.0781075	-0.283209	0.181586	-0.141499	0.607343	0.417993	0.0706973	0.40949	0.215672	0.547162	-0.0611854	0.794832	0.219367	0.1999	0.233634	0.0910081	0.333368	0.380449	0.348331	0.820791	0.714194	-0.306697	0.232312	0.564833	0.402146	-0.228349	0.060058	0.0977599	0.222237	0.125769	0.139034	0.156643	-0.0464562	0.127391	0.136417	-0.222234	0.316747	0	0.608616	0.0417027	0.0550733	-0.099853	0.227782	0.246839	0.0651117	0.210243
YGJ587	-0.32394	-0.600651	-0.456302	-1.17161	0.141604	-0.272379	0.282997	-0.809791	-1.11465	-0.777671	-0.584985	-0.323508	0.109432	0.0305927	0.635865	-0.219367	-0.533068	-0.623023	0.182016	0.133347	-0.27175	0.0870827	0.547194	-0.612166	-0.408929	-0.696937	-0.941388	-0.670243	0	-0.90087	-0.213294	-0.222237	-0.503076	-0.278067	-0.313285	-0.0812984	-0.382172	-0.818502	-0.222234	0	-0.264701	-0.304308	-1.12597	-0.16522	-0.299559	0.113891	-0.839253	-0.195335	0.280324
YGJ588	-0.48591	-0.772266	-0.608403	-0.859182	-0.424813	0.635552	0.282997	-0.404896	-0.905651	0.282789	-0.350991	0.377426	0.328297	0.183556	-0.158966	0.146245	-0.266534	-0.389389	0.910081	-0.200021	0.0543499	-0.261248	0.820791	-0.612166	0.817859	-0.464624	-0.658972	-1.34049	-1.14175	0.060058	-0.275505	0.444473	-0.503076	-0.139034	0.391607	0.232281	-0.764345	0.136417	0	0.105582	0	-0.811488	0.250216	0.16522	0.399412	-0.341672	-0.691149	-0.130223	0.070081
YGJ591	1.45773	1.11549	1.21681	1.71836	1.27444	1.45269	1.41499	1.31591	1.32364	1.48464	1.16997	1.1862	1.42262	0	1.4307	1.53557	1.3993	1.55756	1.27411	1.46682	1.57615	1.48041	0.95759	1.53042	1.22679	1.27772	1.31794	1.60858	1.25592	0.960928	0.133309	1.2223	1.50923	0.973235	1.40978	0.150983	1.4013	0.954919	1.3334	1.47815	1.05881	1.31867	0.708946	0.991319	0.798824	1.70836	0.937988	0.651117	1.05121
YGJ598	-0.64788	-0.257422	0	-1.0935	-1.13284	-0.726345	-0.707493	-0.911015	-0.417993	-1.06046	-0.701982	-1.02444	-0.656594	0.0688336	-0.635865	-0.365611	-0.866235	-0.467267	-1.27411	-0.600063	-0.380449	-0.609579	-0.547194	-0.918249	-1.02232	-1.0454	-0.376555	-0.268097	-0.456698	-1.02099	0.0444363	-1.00006	-1.25769	-1.04275	-0.939856	-0.360036	-0.382172	-0.954919	-0.222234	-0.739076	-1.12498	-0.50718	-1.16768	-0.440586	-0.99853	-0.683345	-0.592414	-0.162779	-0.210243
YGJ599	-1.45773	-0.686458	-1.0647	-0.468645	-0.991231	-0.726345	-0.99049	-0.607343	-0.557324	-1.06046	-0.877478	-0.80877	-1.31319	1.01721	-1.11276	-1.09683	-1.13277	-1.01241	-1.00109	-0.866758	-1.03265	-1.04499	-0.95759	-0.612166	-1.22679	-1.27772	-0.282416	-1.34049	-0.114175	-0.360348	0.84429	-1.55566	-0.754615	-1.32082	-1.48811	0.220667	-1.14652	-1.09134	-1.11117	-1.16141	-1.25733	-1.01436	0.166811	-0.881173	-1.09838	-0.683345	-0.0987356	-0.683673	-0.70081
YGJ600	-0.566895	-0.600651	-0.608403	-0.546752	-0.708022	-0.635552	-0.282997	-0.607343	-0.557324	-0.565579	-0.526487	-0.647016	-0.984892	-0.0305927	-0.476899	-0.950589	-0.666335	-1.09029	-1.27411	-0.600063	-0.815249	-0.696662	0	-0.510139	-0.920091	-0.464624	-0.188278	-0.670243	-0.685047	-0.60058	0.115534	-1.11118	-0.754615	-0.834201	-1.40978	-0.162597	-0.636954	-0.954919	-0.666702	-0.950241	-0.794104	-0.710052	-0.62554	-0.49566	-0.599118	-1.13891	-0.394942	-0.358114	-0.560648
YGJ602	-1.94364	-1.97357	-1.82521	-1.56215	-2.54888	-1.45269	-1.98098	-1.82203	-1.74164	-2.12092	-1.75496	-0.161754	-0.656594	0.650095	-1.9076	-1.02371	-0.599701	-0.934534	-1.36512	-1.80019	-1.57615	-1.74165	-0.683993	-1.63244	-1.12456	-1.51003	-1.60036	-2.81502	-1.82679	-0.480464	0.159971	-1.55566	-1.88654	-2.22454	-1.72307	0.894283	-1.4013	-2.04626	-2.00011	-2.53398	-1.98526	-2.02872	-0.750648	-0.991319	-1.79735	-1.93614	-1.28356	-1.00923	-1.1213
YGJ603	0.728865	0.858073	0.152101	0.62486	0.424813	-0.272379	1.27349	0	0.0696655	-0.141395	0.292493	0.26959	0.656594	-0.0458891	1.4307	0.877467	0.533068	1.01241	0.728064	0.466716	1.03265	1.21916	1.36799	0.918249	0.613394	0.116156	0.658972	1.07239	0.342524	0.30029	-0.0355491	0.66671	0.251538	0.903718	0.783214	-0.0929125	0.891735	0.954919	-0.333351	1.26699	0.198526	0.912924	-0.0834054	0.715953	0.499265	1.13891	0.296207	0.130223	0.770891
YGJ604	-0.16197	-0.257422	-0.304201	-0.546752	-0.991231	-0.998724	-0.141499	-0.708567	-0.348327	-1.34325	-0.526487	-0.53918	-0.43773	-0.191205	-0.158966	-0.146245	-0.466434	-0.467267	-0.273024	-0.466716	-0.380449	-0.348331	-0.136799	0	-0.408929	-0.348468	-0.658972	0.134049	-0.913396	-0.480464	-0.177745	-1.00006	-0.754615	-0.347584	-0.156643	-0.290352	-0.254782	-0.545668	-0.444468	-0.422329	-0.463227	-0.304308	-0.583838	-0.110147	-0.199706	-0.341672	-0.543046	-0.358114	-0.560648
YGJ607	-0.242955	-0.343229	-0.456302	-0.156215	-0.141604	-0.726345	-0.848991	-0.404896	-0.278662	-0.565579	-0.0584985	-0.431344	-0.656594	-0.0917782	-0.317933	-0.365611	-0.0666335	0	-0.45504	-0.400042	0.16305	-0.435414	-1.23119	-0.612166	-0.306697	0	-0.282416	0.268097	-0.456698	-0.420406	-0.142196	-0.333355	-0.251538	-0.20855	-0.548249	-0.139369	-0.127391	0	-0.666702	-0.739076	-0.132351	-0.405744	-0.333622	-0.33044	-0.099853	-0.569454	-0.345575	-0.0976676	-1.33154
YGJ609	0.80985	0.257422	0.152101	0.62486	0.424813	0.453966	1.41499	0.101224	0.0696655	0.0706973	0.292493	0.26959	1.20376	-0.0535373	1.27173	0.950589	0.466434	0.467267	0.546048	0.533389	0.380449	1.21916	1.50478	0.612166	0.920091	0.116156	-0.0941388	0.93834	0.114175	-0.060058	-0.0622109	0.777828	0.503076	0.973235	0.704892	-0.0232281	0.764345	0.954919	0.222234	1.37257	0.727929	0.608616	-0.0834054	0.605806	0.798824	1.02502	-0.0987356	0.0976676	1.26146
YGJ610	-0.97182	-0.686458	-1.82521	-1.0154	-1.41604	-1.2711	-1.13199	-1.11346	-0.835986	-1.27255	-1.11147	-1.1862	-1.09432	-0.0535373	-1.9076	-1.09683	-0.866235	-1.09029	-1.72915	-0.866758	-1.35875	-1.39332	-0.95759	-1.42839	-0.613394	-1.16156	-0.188278	-1.20644	-1.14175	-1.02099	0.355491	-1.77789	-0.880384	-1.2513	-1.64475	0.0348422	-0.891735	-1.50059	-1.3334	-1.58373	-1.19116	-1.21723	-0.500432	-0.991319	-1.09838	-1.13891	-0.740517	-0.618561	-1.26146
YGJ611	-1.21477	-0.94388	-1.36891	-1.17161	-1.84086	-1.3619	-1.41499	-1.82203	-0.76632	-1.55534	-0.994475	-0.916605	-1.20376	-0.0688336	-1.27173	-0.877467	-0.999502	-1.09029	-0.910081	-0.933431	-1.03265	-1.13208	-0.683993	-1.02028	-0.715626	-1.16156	-0.847249	-0.93834	-0.913396	-1.32128	0.00888727	-1.11118	-0.754615	-1.04275	-1.33146	-0.127755	-1.27391	-1.22775	-1.44452	-1.58373	-0.595578	-0.811488	-1.20938	-0.605806	-1.39794	-1.02502	-0.839253	-0.423226	-0.911053
YGJ612	1.94364	2.3168	1.52101	2.42133	2.12407	1.90666	1.69798	1.92325	1.74164	2.26231	1.75496	1.67146	1.42262	0.0382409	1.58966	1.75493	1.999	2.02482	1.45613	1.46682	2.01095	1.21916	1.36799	1.8365	1.63572	1.74234	2.44761	1.47453	2.85436	1.80174	0.257731	1.2223	1.76077	1.52937	1.64475	0.336808	1.91086	1.22775	1.55564	1.37257	2.24996	2.33303	1.33449	0.826099	1.39794	1.70836	1.3823	0.911564	0.630729
YGJ613	0.566895	0.343229	0.304201	0.62486	-0.283209	0.181586	0.848991	0.50612	0.348327	-0.0706973	0.467988	0.485262	0.43773	-0.0458891	0.953798	0.584978	0.666335	0.778778	0.546048	0.533389	0.27175	0.95791	1.50478	0.510139	0.306697	0.348468	0.282416	0.804291	0.228349	0	-0.0177745	0.222237	0.377307	0.278067	0.626571	-0.0580703	0.509563	0.682085	0.444468	0.950241	0.132351	0.710052	0.0417027	0.49566	0.299559	1.02502	0.197471	0.195335	0.420486
YGJ616	0.566895	-0.0858073	0	0.31243	-0.283209	0.0907931	0.424496	0.101224	0.139331	-0.353487	0.233994	0.215672	0	-0.0764818	0.476899	0	0.466434	0.389389	0	0.266695	0.0543499	0.261248	0.820791	0.408111	-0.306697	0	-0.0941388	0	0.456698	-0.360348	-0.0355491	-0.222237	0.125769	0.0695168	-0.156643	-0.127755	0.254782	-0.272834	0	0.422329	-0.0661754	0.50718	-0.0834054	0.16522	-0.399412	0.455563	0.148103	0	0.140162
YGJ619	0.48591	1.28711	1.0647	1.24972	0.566418	0.453966	0.141499	1.11346	0.975317	1.27255	0.935976	0.970523	0	-0.0152964	0.158966	0.804345	1.06614	1.16817	0.546048	0.933431	0.597849	0.435414	0	0.816222	0.511162	0.813093	1.41208	0.134049	1.37009	0.720696	0.133309	0.333355	1.13192	0.695168	0.704892	0.127755	0.636954	0.272834	0.444468	0.211165	1.12498	1.1158	0.708946	0.220293	0.499265	0.569454	0.888621	0.455782	0
YGJ620	0.080985	0	-0.304201	-0.31243	0.141604	-0.0907931	0.424496	-0.202448	-0.417993	-0.282789	-0.116997	-0.53918	0.656594	-0.0152964	0.158966	0.219367	-0.333167	-0.155756	0.0910081	-0.133347	0.380449	0.174165	0.95759	0.102028	0.306697	0	-0.188278	0.402146	0	-0.60058	-0.151084	0.111118	-0.251538	0	0.0783214	-0.139369	0	-0.545668	0	0.316747	-0.264701	-0.405744	-0.333622	0.33044	0.199706	0.341672	-0.246839	0.0976676	0.140162
YGJ623	0.16197	0.0858073	-0.456302	-0.31243	-0.283209	-0.181586	-0.282997	-0.101224	-0.348327	-0.848368	-0.526487	-0.485262	-0.43773	-0.0994264	-0.317933	-0.6581	-0.333167	-0.467267	-0.182016	-0.133347	0.0543499	-0.522496	-0.273597	0.102028	-0.408929	0	-0.282416	-0.134049	-0.114175	-0.780754	-0.106647	-0.66671	-0.377307	-0.695168	-0.626571	-0.360036	-0.127391	-0.818502	-0.111117	-0.211165	-0.595578	-0.304308	-0.62554	-0.49566	-0.599118	0	-0.493678	-0.0976676	-0.350405
YGJ624	-1.37674	-1.71615	-1.97731	-1.48404	-2.12407	-1.08952	-0.424496	-1.61958	-2.29896	-0.989763	-2.28144	-0.647016	-1.53205	2.34034	-0.317933	-1.90118	-2.59871	-1.63543	-2.00218	-1.66684	-1.03265	-1.74165	-0.95759	-1.22433	-2.35134	-1.62619	-1.2238	-1.74263	-0.228349	-1.68162	1.76857	-2.00013	-1.50923	-1.52937	-2.03636	1.59113	-1.27391	-1.09134	-1.3334	-1.37257	-1.32351	-2.23159	-0.291919	-0.881173	-1.89721	-1.13891	1.18483	-1.17201	-0.70081
YGJ628	0.404925	0.772266	0.608403	0.859182	0.708022	0.272379	0	0.809791	0.835986	0.777671	0.526487	0.700934	0.547162	-0.0535373	0	0.584978	0.932869	0.856656	0.182016	0.600063	0.489149	0.435414	-0.410396	0.612166	-0.102232	0.696937	1.2238	0.268097	0.570873	0.480464	0.0533236	0.222237	0.377307	0.20855	0.469928	0.0116141	0.382172	-0.409251	0.444468	0.316747	0.86028	0.912924	0.500432	0	0.299559	0.569454	0.543046	0.293003	-0.350405
YGJ630	0.64788	0.94388	1.21681	0.93729	0.991231	0.817138	1.13199	0.911015	0.696655	0.777671	0.760481	0.754852	1.20376	-0.0152964	0.794832	1.3162	0.799602	1.01241	0.819073	0.800084	0.706549	1.13208	0.683993	0.816222	0.306697	0.696937	1.12967	0.536194	1.14175	0.60058	0.0444363	0.66671	0.503076	0.695168	1.25314	0.0348422	1.14652	0.682085	1.11117	1.16141	0.727929	1.1158	0.333622	0.49566	0.99853	1.48058	0.543046	0.488338	0.770891
YGJ633	-0.566895	-0.343229	0	-0.234322	0	-0.817138	0.141499	-0.708567	-0.696655	-0.494881	-0.818979	-0.754852	0	-0.0994264	0.476899	0.219367	-0.399801	-0.155756	-0.273024	-0.533389	-0.706549	0.609579	0.273597	0	-0.204465	-0.813093	-0.564833	0.268097	-1.02757	-0.480464	-0.213294	-0.222237	-0.251538	-0.139034	-0.391607	-0.278737	0.254782	-0.409251	-0.888936	0.211165	-0.198526	-0.50718	-0.792351	0.110147	-0.898677	0	-0.641781	-0.0651117	0.070081
YGJ635	0.97182	1.37292	1.21681	1.40593	1.55765	1.18031	1.55648	1.11346	1.04498	1.13116	0.877478	1.02444	1.64149	-0.0152964	1.11276	1.46245	1.13277	1.4018	1.36512	1.20013	1.03265	1.21916	1.09439	1.22433	0.817859	1.0454	0.941388	0.804291	1.59844	0.90087	0.0977599	1.00006	0.754615	0.556134	1.48811	0.116141	1.27391	1.09134	1.22229	1.37257	0.794104	1.31867	0.708946	0.715953	1.39794	1.70836	0.740517	0.683673	0.981134
YGJ636	-0.404925	-0.171615	-0.608403	-1.17161	-0.424813	-0.817138	-0.141499	-0.50612	-0.696655	-0.636276	-0.877478	-1.02444	-0.109432	0.0917782	0	-0.511856	-0.866235	-0.700901	-0.0910081	-0.600063	-0.815249	0	0.410396	0	-0.715626	-0.696937	-0.564833	-0.536194	-1.25592	-0.360348	-0.284393	0	-1.00615	-0.347584	-0.469928	-0.267123	-0.127391	-0.409251	-0.666702	0.211165	-0.264701	-0.50718	-0.750648	-0.0550733	-0.099853	-0.227782	-1.13546	-0.358114	0.210243
YGJ641	-0.32394	-0.429036	-0.760503	-1.24972	-0.424813	-1.45269	-0.141499	-1.11346	-1.11465	-2.05022	-0.935976	-1.24011	-0.43773	-0.0611854	-0.794832	-0.365611	-1.1994	-1.32392	-0.0910081	-1.0001	-1.03265	-0.261248	0.136799	-0.918249	-0.920091	-0.929249	-1.50622	-0.402146	-0.114175	-1.56151	-0.248843	-1.33342	-1.13192	-1.2513	-0.548249	-0.534247	-0.382172	-1.22775	-1.11117	0.105582	-1.52203	-0.710052	-1.20938	-0.16522	-0.99853	-0.341672	-1.13546	-0.260447	0.140162
YGJ642	0.48591	0.429036	0.456302	0.0781075	0.566418	-0.544759	0.848991	-0.101224	-0.0696655	-0.494881	0	0	0.656594	-0.0611854	0.317933	0.731223	0	0	0.819073	0	-0.16305	0.696662	-0.136799	0.510139	0.102232	0	-0.0941388	0.670243	0.114175	-0.30029	-0.151084	0	0	-0.0695168	0.626571	-0.197439	0.509563	0.136417	0.666702	0.950241	-0.397052	0	-0.250216	0.385513	0.099853	1.02502	-0.0987356	0.162779	0.981134
YGJ645	-0.242955	-0.772266	-0.760503	-0.781075	-0.283209	-0.726345	0.141499	-0.708567	-0.905651	-0.919065	-0.467988	-0.647016	0.218865	-0.0688336	-0.317933	-0.292489	-0.799602	-0.778778	0.182016	-0.200021	-0.706549	-0.174165	0.410396	-0.510139	-0.511162	-0.813093	-0.75311	-0.402146	-0.114175	-1.20116	-0.213294	-0.777828	-0.628846	-0.278067	-0.313285	-0.301966	-0.127391	-0.818502	-0.444468	0.105582	-1.32351	-0.50718	-0.917459	0.110147	-0.499265	0.113891	-0.740517	-0.227891	0.350405
YGJ646	0.48591	0.94388	0.304201	0.390537	-0.141604	0.272379	0.424496	0.50612	0.348327	0.141395	0.116997	0.161754	0.328297	-0.0305927	0.953798	0.365611	0.333167	0.467267	0.0910081	0.666737	0.27175	0.261248	1.50478	0.918249	0.920091	0.348468	0.658972	0.804291	-0.114175	0.240232	0.00888727	0.333355	0.377307	0.417101	0	-0.127755	0.127391	0.682085	0.222234	0.527911	0.397052	0.50718	0.125108	0.16522	0.898677	0.569454	0.246839	0.162779	0.490567
YGJ654	0.48591	0.514844	0.456302	0.62486	0.141604	0.998724	-0.282997	0.607343	0.557324	0.494881	0.643484	0.431344	-0.218865	0.0535373	-0.476899	0.146245	0.533068	0.0778778	-0.364032	0.666737	0.489149	-0.348331	-1.36799	-0.408111	0.204465	0.464624	0.941388	-0.268097	0.342524	0.480464	0	0.111118	0.377307	0.20855	-0.0783214	0.185825	0.254782	-0.409251	0	-0.633494	0.661754	0.50718	0.333622	0.110147	-0.499265	-0.341672	0.394942	0.0651117	-0.140162
YGJ656	-0.080985	-0.343229	0	-0.390537	0.283209	0.998724	-0.424496	0.50612	0.139331	0.282789	0.233994	-0.161754	-0.328297	0.0535373	-0.158966	0	0.1999	0.155756	0.182016	0.533389	-0.0543499	-0.435414	-1.77838	-0.102028	-0.715626	0.116156	0.282416	0	-0.685047	0	-0.0622109	-0.222237	0.377307	0.139034	-0.391607	0.0464562	-0.127391	0	0.111117	-0.422329	0.397052	0.101436	0.0417027	-0.110147	0.099853	-0.341672	0.0987356	0.0325559	0
YGJ658	0.48591	0.514844	0.760503	0.390537	-0.141604	1.08952	0	0.404896	0.487658	0.636276	0.467988	0.377426	-0.109432	-0.0611854	-0.476899	0.365611	0.533068	0.467267	0.273024	0.333368	0.597849	0	-0.95759	-0.102028	0.511162	0.116156	0.941388	-0.402146	0.228349	0.180174	-0.0177745	0.444473	0.377307	0.347584	0	0.0232281	0.254782	0.136417	0.333351	-0.211165	0.794104	0.811488	0.291919	-0.0550733	-0.099853	-0.227782	0.394942	0.293003	-0.420486
YGJ661	0.566895	0.514844	1.0647	0.156215	0.708022	1.18031	0	0.202448	0.487658	1.13116	0.584985	0.053918	-0.218865	0.137667	-0.317933	-0.0731223	0.0666335	0.389389	-0.0910081	0.533389	0.380449	-0.348331	0	0.204055	0.204465	0.348468	0.847249	-0.268097	0	0.60058	-0.00888727	0.222237	0.754615	0.0695168	-0.391607	0.0929125	0.127391	0.545668	0.222234	-0.316747	0.727929	0.50718	0.208513	-0.16522	-0.099853	-0.911126	0.246839	-0.0325559	0.280324
YGJ663	0.242955	0.171615	0.304201	0	0.424813	1.45269	-0.424496	0.303672	0.278662	1.20185	0.292493	0.377426	0.43773	0	-0.476899	-0.0731223	0.399801	0.0778778	-0.45504	0.533389	0.489149	0	-0.683993	0.204055	0.204465	0.348468	0.941388	0.268097	0	0.30029	-0.0355491	0	-0.251538	0.139034	-0.234964	0.150983	-0.254782	0.272834	0.444468	-0.105582	0.595578	0.50718	0.166811	-0.0550733	0.299559	-0.113891	0.197471	0.0976676	0.350405
YGJ666	0.16197	-0.514844	-0.152101	-0.31243	0.141604	1.18031	0	0.303672	0	0.141395	0.0584985	-0.26959	0.218865	0.08413	-0.158966	-0.146245	-0.1999	0.0778778	0.273024	0.200021	0.16305	-0.174165	-0.683993	0.408111	-1.02232	0.232312	0.282416	0.268097	-0.456698	0.180174	-0.124422	-0.333355	0.125769	-0.139034	-0.234964	0.0348422	0	0	0.333351	-0.739076	0.264701	0.101436	-0.166811	-0.385513	0.299559	-0.227782	0	0	0
YGJ673	-0.080985	0.257422	0.456302	-0.156215	0.141604	0.726345	-0.141499	0.303672	0.417993	0.919065	0.40949	0.593098	0.547162	0.114723	-0.635865	-0.219367	0.399801	0.233634	0.637056	0.533389	0.380449	-0.435414	-1.36799	-0.306083	-0.511162	-0.116156	0.564833	-0.402146	0.456698	0.840812	-0.0888727	-0.66671	0.251538	0.139034	-0.313285	0.348422	-0.254782	-0.409251	-0.111117	-0.422329	0.198526	0.202872	0.250216	0.0550733	-0.099853	-0.227782	0.197471	0	0.490567
YGJ674	0.32394	0.772266	0	0.546752	0.849627	1.08952	-0.282997	0.911015	0.696655	0.777671	0.584985	0.53918	-0.43773	-0.0152964	-0.158966	0.292489	0.466434	0.233634	0.182016	0.266695	0.27175	-0.522496	-0.136799	0.306083	-0.204465	0.696937	0.75311	-0.670243	0.570873	0.360348	0.0266618	0.111118	-0.125769	0.486618	0.313285	0.162597	0	0.272834	0.222234	0	0.463227	0.50718	0.0834054	0	-0.399412	0	0.44431	0.162779	0
YGJ676	-0.64788	-0.343229	0.152101	-0.234322	-0.283209	0.272379	-0.848991	-0.303672	-0.417993	0.565579	-0.233994	0.431344	0.218865	0.978967	-0.794832	-0.804345	0.399801	-0.389389	-0.273024	-0.133347	-0.16305	-0.783745	0.136799	-0.918249	-0.204465	-0.232312	0.0941388	-0.268097	-0.342524	0.540522	0.346603	-0.777828	-0.125769	-1.18179	-0.548249	0.952353	-1.52869	-0.272834	-0.222234	-0.844658	-0.661754	-0.304308	0.750648	-0.33044	0	-1.13891	0.197471	-0.423226	-0.840972
YGJ680	-0.566895	-0.686458	0	-1.17161	-0.424813	0.453966	-0.707493	0.202448	-0.278662	0.0706973	-0.350991	-0.107836	-0.656594	0.191205	-1.4307	-1.16996	-0.1999	-1.01241	-0.0910081	-0.466716	-0.706549	-1.39332	0.136799	-0.918249	-0.204465	-0.232312	0.0941388	-0.402146	-0.570873	-0.420406	0.151084	-0.555591	0.251538	-0.695168	-0.939856	0.185825	-0.636954	0	-0.444468	-0.633494	-0.595578	-0.811488	0.417027	-0.275366	0	-1.2528	-0.44431	-0.325559	-0.140162
YGJ688	0.48591	0.600651	0.760503	0.781075	0.849627	0.453966	0.99049	0.708567	0.626989	0.565579	0.584985	0.53918	0.984892	0.00764818	0.794832	1.16996	0.533068	0.856656	0.819073	0.600063	0.489149	1.04499	0.410396	0.510139	0.306697	0.580781	0.564833	0.402146	0.799222	0.420406	0.00888727	0.444473	0.503076	0.556134	1.01818	-0.0348422	1.01913	0.545668	0.777819	0.950241	0.661754	0.811488	0.208513	0.385513	0.698971	1.36669	0.296207	0.358114	0.70081
YGJ689	0.80985	0.94388	0.912604	1.0154	0.849627	0.726345	0.707493	0.708567	0.696655	0.636276	0.701982	0.647016	1.42262	-0.0229445	0.953798	1.24308	0.932869	1.01241	0.910081	0.73341	0.815249	1.21916	0.410396	0.918249	0.408929	0.464624	0.658972	0.804291	1.37009	0.540522	0.0355491	0.555591	0.628846	0.556134	1.0965	0.0232281	0.891735	0.954919	0.666702	0.950241	0.397052	1.01436	0.45873	0.605806	0.99853	1.2528	0.641781	0.488338	0.770891
YGJ690	-1.78167	-1.54453	-0.456302	-0.468645	-1.55765	-1.2711	-0.707493	-1.31591	-1.32364	-0.919065	-0.994475	-1.29403	-1.09432	1.50669	-1.11276	-1.68181	-0.866235	-1.47968	-1.82016	-1.93354	-2.01095	-1.91582	-1.91518	-1.1223	-0.408929	-1.27772	-0.564833	-1.47453	-1.82679	-0.060058	0.94205	-2.22237	-1.88654	-2.36357	-0.939856	1.18463	-2.16564	-0.954919	-1.3334	-1.7949	-2.38231	-1.21723	-0.208513	-1.70727	-1.29809	-1.82225	0.197471	-1.33479	-0.981134
YGJ694	0.32394	0.514844	0.760503	0.390537	0.849627	0.272379	0.141499	0.50612	0.417993	0.212092	0.116997	0.26959	0.218865	-0.08413	0.158966	0.219367	0.266534	0.623023	-0.182016	0.600063	0.597849	0.0870827	0.273597	0.714194	0.102232	0.348468	0.847249	0.804291	0	0.420406	-0.00888727	0.111118	0.125769	0.278067	0.391607	-0.0696844	0.254782	0.545668	0.666702	0.316747	0.595578	0.405744	0.125108	-0.0550733	0.499265	0.455563	0.197471	0.130223	0.140162
YGJ695	0.566895	0.0858073	0.304201	0.156215	0.849627	-0.181586	0.707493	0.303672	-0.139331	0.212092	0.175496	0.215672	0.656594	-0.00764818	1.11276	0.804345	0.266534	0.389389	0.546048	0.400042	0.0543499	0.783745	0.547194	0.612166	0	0.232312	0.282416	0.402146	0.228349	0.060058	-0.106647	0.444473	0.503076	0.278067	0.704892	-0.116141	0.764345	0.409251	0.888936	0.950241	0.0661754	0.608616	-0.166811	0.385513	0.199706	0.911126	0.0493678	0.130223	0.911053
YGJ696	2.18659	2.3168	2.58571	2.42133	2.12407	2.45141	2.68847	1.82203	1.95063	2.47441	1.75496	1.77929	2.62638	0.0994264	2.3845	2.26679	2.1989	2.41421	2.36621	1.86686	1.90225	2.35123	2.59917	2.34664	2.35134	2.09081	2.25933	2.68097	2.74019	1.92186	0.248843	1.77789	1.76077	1.45985	2.27132	0.325194	2.03825	1.77342	1.88899	2.21723	1.85291	2.23159	1.33449	1.48698	2.09691	2.5056	1.43167	1.00923	1.68194
YGJ698	0.566895	0.600651	0.304201	0.546752	0.141604	0.181586	0.282997	0.708567	0.487658	-0.0706973	0.175496	0.26959	0.328297	-0.0994264	0.476899	0.511856	0.333167	0.545145	0.637056	0.266695	0.27175	0.261248	0.683993	0.408111	0.715626	0.580781	0.376555	0.93834	0.685047	0.540522	-0.0444363	0.333355	0.754615	0.278067	0	-0.127755	0.509563	0.545668	0.888936	0.316747	0.595578	0.608616	0.125108	0.275366	0.599118	0.569454	0.296207	0.195335	0
YGJ700	-1.86265	-0.94388	-1.97731	-0.781075	-1.41604	-0.635552	0	-1.31591	-1.8113	-0.212092	-1.93045	-1.61754	-0.43773	1.01721	-1.4307	-2.48616	-1.66584	-1.09029	-0.637056	-1.40015	-1.14135	-1.04499	-1.64158	-0.816222	-1.53348	-1.51003	-0.941388	-1.74263	-0.913396	-1.32128	0.444363	-1.77789	-1.88654	-1.45985	-2.81957	0.383264	-0.636954	-0.545668	-1.3334	-0.739076	-0.86028	-1.21723	-1.25108	-0.49566	-0.99853	-0.683345	-0.987356	-0.976676	-0.070081
YGJ702	-1.21477	-0.858073	-0.456302	-0.702967	-0.283209	-1.45269	0.424496	-1.21469	-1.11465	-0.706973	-0.877478	-1.56362	-0.984892	0.374761	-0.158966	-0.438734	-0.799602	-0.545145	-0.819073	-1.40015	-0.380449	0	-0.547194	-1.02028	-1.32902	-1.0454	-0.188278	-0.536194	-0.228349	-0.840812	0.364378	-0.66671	-0.503076	-0.903718	-1.17482	0.0116141	-0.636954	-0.818502	-0.777819	-0.211165	-0.529403	-0.405744	-1.16768	-0.275366	-1.09838	0	-0.789885	-0.618561	-0.840972
YGJ704	0.728865	0.600651	0.608403	0.702967	0.566418	0.0907931	1.27349	0.404896	0.348327	0.353487	0.467988	0.431344	0.547162	-0.0458891	0.794832	0.731223	0.599701	0.856656	0.637056	0.600063	0.380449	0.95791	0.547194	0.714194	0	0.464624	0.376555	1.07239	0.456698	0.180174	-0.0355491	0.333355	0.377307	0.417101	0.783214	-0.0812984	0.764345	0.545668	0.777819	1.05582	0.463227	0.811488	0.0834054	0.49566	0.599118	0.911126	0.296207	0.227891	0.490567
YGJ705	0.566895	0.600651	0.456302	0.234322	0.283209	0.0907931	0	0.303672	0.417993	-0.0706973	0.0584985	0.053918	0.547162	-0.0611854	0.476899	0.438734	0.1999	0.233634	0.546048	0.200021	0.489149	0.783745	0.136799	0.510139	0	0	0.564833	0.268097	0.570873	0.060058	-0.0444363	0.111118	0.503076	0.0695168	0.234964	-0.0929125	0.509563	0.409251	0	0.527911	0.198526	0.608616	0.0834054	0.16522	-0.199706	0.569454	0.0493678	0.130223	-0.140162
YGJ706	-0.080985	0	0.304201	0.31243	0.424813	0.181586	0	0.202448	0.208996	0.212092	-0.0584985	-0.107836	-0.656594	-0.0458891	-0.317933	-0.365611	0.133267	-0.0778778	-0.0910081	-0.0666737	-0.597849	-0.174165	-0.136799	-0.102028	0.511162	0	0.658972	0.268097	-0.799222	-0.180174	0.142196	-0.333355	0	-0.20855	-0.469928	-0.150983	-0.254782	0.136417	0.222234	-0.422329	0.0661754	0.101436	0.0417027	-0.49566	-0.199706	-0.227782	0.0493678	0.0651117	0
YGJ707	-1.78167	-1.2013	-0.760503	-0.859182	-1.55765	-2.54221	-0.141499	-1.51836	-1.46297	-1.69674	-2.16445	-1.1862	-0.328297	0.917782	-1.27173	-1.46245	-2.33217	-1.32392	-1.0921	-1.2668	-1.35875	-1.04499	-1.77838	-2.04055	-1.12456	-2.09081	-0.941388	-0.536194	-0.799222	-1.26122	1.13757	-1.11118	-1.00615	-1.45985	-1.95803	-0.0348422	-1.14652	-0.545668	-2.44457	-0.950241	-1.25733	-1.21723	-0.542135	-0.881173	-1.19824	-1.02502	-1.08609	-0.976676	-0.070081
YGJ708	-0.566895	-0.514844	-0.912604	-1.48404	-0.283209	-0.726345	0	-0.607343	-0.975317	-1.55534	-0.994475	-0.862688	-0.328297	0.152964	-0.635865	-0.219367	-1.13277	-1.16817	-0.0910081	-0.600063	-0.489149	-0.261248	0.136799	-0.408111	-0.408929	-1.0454	-0.941388	-0.536194	0	-1.20116	-0.266618	-0.333355	-1.25769	-0.347584	-0.469928	-0.232281	-0.382172	-1.22775	-0.777819	0.105582	-0.330877	-1.31867	-0.500432	-0.16522	-0.499265	-0.455563	-1.13546	-0.227891	-0.070081
YGJ711	0.16197	0.429036	0.912604	0.546752	0.141604	0	0	0.708567	0.557324	0.565579	0.350991	0.377426	0.328297	-0.0535373	0.158966	0.511856	0.399801	0.311511	0.273024	0.200021	0.16305	0.0870827	-0.273597	0.204055	-0.511162	0	1.2238	0.134049	0.342524	0	0.00888727	0	0.377307	0.278067	0.469928	-0.0232281	0.509563	0.136417	0.444468	0.211165	0.727929	0.608616	0.166811	-0.0550733	0.199706	0.455563	0.246839	0.162779	-0.280324
YGJ712	-0.080985	-0.0858073	0.456302	0.31243	0	-0.363172	0	0.202448	0.278662	0.494881	0.116997	0.053918	-0.328297	-0.114723	-0.317933	-0.146245	0.1999	0.0778778	-0.273024	-0.266695	0.0543499	-0.0870827	0.683993	0.306083	-0.817859	0	0.376555	0.536194	-0.456698	0	-0.0355491	-0.555591	0	0.0695168	-0.313285	-0.150983	-0.127391	0	-0.111117	-0.105582	0.264701	-0.101436	0	-0.220293	-0.099853	0.455563	0.197471	0.0325559	-0.630729
YGJ714	0.64788	0.686458	0.304201	0.234322	0	-0.181586	-0.141499	0.50612	0.417993	-0.141395	0.292493	0.161754	0.109432	-0.0994264	0	0.292489	0.399801	0.311511	0	0	0.16305	0	-0.95759	0.306083	-0.408929	0.232312	0.470694	0.134049	0.913396	0.540522	0	0	0.125769	-0.139034	0.234964	-0.0929125	0.127391	-0.954919	-0.111117	-0.316747	0.264701	0.608616	0.208513	0.0550733	-0.599118	-0.341672	0.345575	0.227891	-0.490567
YGJ715	-0.32394	-0.257422	-0.456302	-0.781075	-1.41604	-0.181586	-0.848991	-0.404896	-0.696655	-0.0706973	-0.643484	-0.80877	-0.109432	0.183556	-0.158966	-0.584978	-0.599701	-0.856656	0	-0.666737	-0.706549	-0.174165	0.547194	-0.816222	0.511162	-0.929249	-0.75311	-1.07239	0.114175	-0.30029	-0.186633	0	-0.628846	-0.486618	-0.626571	-0.197439	-0.382172	-0.136417	-0.555585	-0.105582	-0.132351	-0.405744	-0.45873	-0.385513	0	-0.683345	-0.691149	-0.0976676	0.210243
YGJ717	0.16197	-0.257422	0.152101	0.0781075	0.424813	0.817138	0.848991	0.101224	-0.417993	0.706973	-0.0584985	-0.053918	0.656594	0.244742	1.11276	0.365611	-0.1999	-0.233634	1.1831	0.133347	0.597849	0.696662	1.77838	0.612166	0.920091	0.232312	0.0941388	0.670243	0.228349	0.420406	-0.239956	0.777828	0.377307	0.278067	0.391607	0.0116141	0.382172	0.954919	0.666702	0.739076	0.727929	0.202872	0.0417027	0.49566	1.09838	0.911126	-0.641781	0.0325559	0.770891
YGJ719	1.21477	1.54453	1.52101	1.24972	1.13284	1.90666	0.282997	1.61958	1.53264	1.69674	0.760481	0.970523	0.547162	-0.0458891	0.476899	0.950589	0.932869	1.09029	0.364032	0.866758	1.25005	0.0870827	1.23119	1.32636	0.511162	0.464624	1.6945	0.536194	1.59844	0.90087	0.151084	0.66671	1.50923	0.695168	0.626571	0.150983	0.636954	0.272834	1.22229	0.527911	1.25733	1.21723	0.792351	0.275366	0.299559	0.797235	0.839253	0.520894	-0.350405
YGJ720	-0.080985	0.0858073	0	0.156215	0.283209	-0.181586	0.282997	0.303672	0.208996	-0.353487	-0.116997	0.107836	0.218865	-0.130019	-0.158966	0.146245	0.1999	0	0.182016	-0.133347	0.0543499	-0.174165	-0.410396	0.408111	-0.613394	0.116156	-0.0941388	0.402146	-0.114175	-0.120116	-0.0710981	-0.222237	-0.125769	-0.347584	0.156643	-0.162597	0.254782	-0.409251	0.555585	0.105582	-0.132351	0.405744	-0.0417027	0.110147	-0.099853	-0.341672	0.0493678	0.0651117	-0.420486
YGJ722	0.080985	0	0.152101	-0.234322	-0.424813	-0.726345	0.848991	-0.404896	-0.487658	-0.636276	-0.0584985	-0.26959	0	-0.191205	0.158966	0.0731223	-0.333167	-0.233634	-0.182016	-0.266695	-0.597849	0.0870827	-0.136799	0.306083	0.102232	-0.464624	-0.470694	0.134049	-0.685047	-0.30029	-0.177745	-0.444473	-0.377307	-0.139034	0	-0.220667	0.509563	0.272834	-0.111117	0.316747	-0.132351	0.202872	-0.333622	0.16522	-0.199706	-0.113891	-0.493678	0	-0.560648
YGJ723	-1.37674	-2.14518	-0.456302	-0.468645	-1.84086	-1.08952	-0.141499	-1.61958	-1.67197	-0.141395	3.7439	-0.26959	-3.06411	8.44359	-1.11276	-1.16996	-0.732968	-0.700901	0.45504	-1.40015	-1.57615	-2.17707	-0.820791	-1.22433	-1.12456	-1.74234	-1.60036	-1.60858	-1.02757	-0.720696	6.82542	-1.55566	-1.76077	-1.87695	1.0965	7.00328	-2.03825	-1.09134	-1.44452	-1.7949	2.71319	-1.31867	7.54819	-1.48698	-0.698971	-0.797235	3.75195	-0.55345	0.140162
YGJ724	-0.404925	-0.343229	-1.52101	-0.781075	0	0.181586	-0.424496	-0.202448	-1.46297	0.141395	-0.350991	-0.26959	0.328297	0.0458891	0.158966	-0.292489	-0.666335	-0.389389	0	-0.466716	-0.27175	0.0870827	1.09439	-0.102028	0	-0.464624	-0.564833	-0.402146	-0.228349	-0.420406	-0.222182	0.333355	-0.251538	0	-0.469928	-0.0348422	-0.382172	0	0	0	-0.198526	-0.304308	0	0.110147	0.099853	0	-0.937988	-0.162779	0.490567
YGJ725	-0.566895	-0.600651	-0.912604	-1.24972	-0.141604	0.726345	-0.424496	-0.50612	-1.32364	0.212092	-0.467988	-0.593098	-0.328297	0.191205	-0.635865	-0.511856	-0.866235	-0.700901	0.45504	-0.266695	-0.16305	0	0.136799	-0.408111	-0.102232	-0.348468	-0.75311	-0.804291	-0.342524	-0.30029	-0.29328	0	-0.628846	-0.20855	-0.391607	-0.0116141	-0.254782	-0.272834	0.111117	-0.105582	-0.0661754	-0.202872	-0.166811	0.275366	0.399412	-0.113891	-1.2342	-0.293003	0.070081
YGJ726	-0.404925	-0.429036	-0.608403	-0.781075	-0.708022	-0.363172	0.282997	-0.809791	-0.975317	-0.282789	-0.643484	-0.323508	-0.218865	0.0688336	-0.317933	-0.292489	-0.799602	-0.934534	0.45504	-0.266695	-0.27175	0	0.410396	-0.612166	-0.102232	-1.27772	-0.75311	-1.34049	-0.799222	-1.26122	-0.266618	0	-0.503076	-0.0695168	-0.313285	0.116141	-0.254782	-0.272834	-0.111117	0.105582	-0.0661754	-0.608616	-0.750648	-0.0550733	-0.499265	-0.341672	-0.888621	-0.195335	0.210243
YGJ727	-0.64788	-0.171615	-0.608403	-0.859182	0.141604	0.544759	0.141499	-0.404896	-0.76632	0.494881	-0.233994	-0.161754	0.43773	0.290631	0.158966	-0.292489	-0.533068	0	0.728064	-0.0666737	0.0543499	0.0870827	0.683993	-0.102028	0.613394	-0.116156	-0.188278	-0.134049	0	0.480464	-0.257731	0.555591	-0.251538	0.0695168	0	0.116141	0	0	0.444468	0	0.132351	-0.405744	0.166811	0.385513	0.399412	0.341672	-0.691149	-0.0651117	0.350405
YGJ728	-1.0528	-1.28711	-0.456302	-0.62486	-0.849627	-1.2711	-0.848991	-1.41713	-0.76632	-1.48464	-1.22847	-1.34795	-0.547162	-0.00764818	0.158966	-0.438734	-0.866235	-0.700901	-1.1831	-1.53349	-1.03265	-0.609579	-1.36799	-0.816222	-0.920091	-1.27772	-0.941388	-0.93834	-0.114175	-1.1411	0.648771	-0.888946	-1.38346	-0.903718	-0.704892	-0.418106	-1.4013	-1.09134	-1.22229	-0.422329	-1.58821	-0.608616	-0.166811	-0.49566	-1.49779	-0.341672	-1.03672	-0.488338	-0.490567
YGJ730	1.0528	0.686458	0.760503	1.0154	1.13284	0.726345	1.69798	0.607343	0.139331	0.706973	0.643484	0.53918	1.20376	-0.0229445	1.9076	1.02371	0.599701	1.01241	0.728064	0.866758	1.14135	1.39332	1.23119	1.42839	1.63572	0.580781	0.941388	1.47453	0.799222	0.420406	-0.0177745	1.2223	1.13192	0.903718	1.0965	-0.0116141	0.891735	1.36417	0.888936	1.37257	0.86028	0.811488	0.166811	0.936246	1.39794	1.13891	0.345575	0.325559	1.4717
YGJ733	0.16197	0	0.608403	0.0781075	-0.849627	-0.635552	0.565994	0	0.139331	-0.636276	0	-0.161754	-0.328297	-0.137667	0.635865	0.0731223	0.0666335	0.155756	0.273024	-0.133347	-0.489149	-0.0870827	0.136799	0.204055	0.306697	0	0	0.268097	-0.570873	-0.060058	-0.106647	-0.111118	-0.125769	0.0695168	0.0783214	-0.232281	0.509563	-0.545668	0.111117	-0.211165	0.529403	0.101436	-0.417027	-0.16522	0.099853	0.455563	-0.0493678	0.130223	-0.350405
YGJ734	0.566895	0.514844	1.36891	0.93729	1.41604	0.817138	2.12248	0.50612	0.487658	0.989763	0.40949	0.53918	1.86035	-0.08413	1.27173	1.16996	0.866235	0.934534	0.819073	0.73341	1.68485	1.30624	1.64158	1.32636	1.22679	1.0454	1.31794	2.01073	1.48427	0.780754	-0.00888727	1.66677	1.25769	0.973235	0.939856	-0.0696844	1.4013	2.18267	0.666702	1.05582	0.727929	0.811488	0.291919	0.881173	1.09838	1.48058	0.345575	0.293003	0.490567
YGJ738	0.32394	0.600651	-0.304201	0.156215	0.283209	0.544759	-0.141499	0.404896	0.139331	0.212092	0.175496	0.215672	0.547162	-0.0688336	0.476899	0.219367	-0.0666335	0.233634	0.0910081	0.400042	0.489149	0.261248	0	0.510139	0.204465	-0.116156	0.282416	0.134049	0.456698	0	-0.0888727	0.222237	-0.125769	0.139034	0.156643	-0.0580703	0.127391	0	0.444468	0.316747	0.463227	0.202872	0.0417027	0.110147	0.199706	0.569454	-0.197471	-0.0976676	0.210243
YGJ740	0.16197	0.600651	0.760503	0.546752	0.566418	0.363172	0.424496	0.404896	0.557324	0.424184	0.40949	0.323508	0.656594	-0.0382409	-0.158966	0.6581	0.533068	0.623023	0.273024	0.200021	0.16305	0.261248	-0.683993	0.408111	0	0.348468	0.941388	0	0.456698	0.180174	-0.0266618	0.111118	0.251538	0.347584	0.548249	-0.0232281	0.382172	0.409251	0.333351	0.527911	0.463227	0.608616	0.250216	0	0.199706	0.911126	0.394942	0.358114	0.210243
YGJ741	0.242955	0.514844	0.912604	0.781075	0.991231	-0.0907931	0.848991	0.303672	0	0.212092	-0.0584985	-0.215672	1.09432	-0.0535373	0.953798	0.438734	0.666335	0.623023	1.0921	0.266695	1.03265	0.696662	1.77838	1.02028	0.306697	0.464624	0.470694	0.804291	0.570873	-0.360348	-0.0710981	0.222237	-0.251538	0.695168	0.391607	-0.197439	0.382172	0.409251	0.888936	0.844658	0.463227	0	-0.166811	0.550733	0	0.683345	0.0987356	0	0.420486
YGJ743	1.13379	1.02969	1.82521	0.93729	1.13284	0.453966	1.69798	0.708567	0.696655	0.848368	0.701982	0.754852	1.42262	-0.0382409	1.74863	1.38932	0.932869	1.16817	1.0921	0.800084	1.25005	1.56749	1.36799	1.22433	1.43125	0.929249	1.12967	1.60858	0.685047	0.480464	0	0.66671	1.25769	0.834201	1.01818	-0.0232281	1.65608	2.04626	0.777819	1.16141	0.727929	1.1158	0.417027	0.936246	0.898677	1.70836	0.44431	0.586005	0.70081
YGJ744	0.728865	0.171615	0.608403	0.234322	0.849627	-0.453966	1.13199	-0.101224	-0.139331	-0.494881	0.175496	0.215672	0.547162	-0.0764818	1.11276	0.731223	0.333167	0.467267	0.546048	0.333368	0.706549	0.870827	0.95759	0.816222	0.613394	0.116156	-0.0941388	0.804291	-0.342524	0	-0.115534	0.444473	0.251538	0.486618	0.626571	-0.104527	0.636954	0.545668	0.222234	1.05582	0.198526	0.50718	-0.166811	0.605806	0.399412	0.683345	0	0.195335	0.630729
YGJ745	0.48591	0.514844	0.456302	0.62486	0.566418	0.0907931	0.424496	0.202448	0.487658	0	0.350991	0.215672	-0.109432	-0.160612	0.158966	0.292489	0.466434	0.545145	-0.182016	-0.133347	0.380449	0.0870827	0.683993	0.510139	0.204465	0.464624	0.282416	0.536194	0.114175	0.180174	-0.0266618	-0.333355	0.628846	0.347584	0.156643	-0.0812984	0.509563	-0.272834	-0.666702	0.316747	0.595578	0.608616	0.125108	0.275366	0.399412	0.569454	0.0987356	0.195335	-0.140162
YGJ746	0.97182	0.858073	0.760503	0.859182	1.55765	0.635552	1.27349	0.708567	0.626989	0.706973	0.526487	0.754852	1.31319	-0.00764818	0.794832	1.3162	0.999502	1.01241	1.27411	0.866758	0.597849	1.13208	0.547194	1.02028	0.408929	0.929249	0.658972	1.07239	1.48427	0.540522	0.0266618	0.555591	0.503076	0.625651	1.25314	0.0116141	1.01913	1.09134	1.55564	1.05582	0.264701	0.710052	0.333622	0.715953	1.29809	1.59447	0.394942	0.455782	0.70081
YGJ747	-0.32394	-0.858073	-0.912604	-0.702967	0	-0.272379	0.565994	-0.708567	-0.905651	-0.141395	-0.643484	-1.02444	0.218865	0.198853	0	-0.584978	-1.26604	-0.623023	0.364032	-0.466716	-0.815249	-0.0870827	0.410396	-0.612166	-0.408929	-0.813093	-0.75311	-0.402146	-0.342524	0.060058	-0.222182	-0.333355	-0.628846	-0.417101	-0.234964	-0.0464562	-0.382172	-0.136417	0.111117	0.105582	-0.397052	-0.608616	0.0417027	0.275366	-0.199706	-0.455563	-0.888621	-0.39067	0.280324
YGJ748	1.45773	1.80195	1.52101	2.18701	1.69925	1.81586	2.12248	1.61958	1.8113	2.12092	1.46246	1.5097	1.64149	0.0382409	1.11276	1.68181	1.7991	2.1027	1.72915	1.66684	2.01095	1.48041	1.50478	1.1223	1.43125	1.62619	1.97692	1.87668	1.94097	1.44139	0.222182	1.44454	1.635	1.04275	1.64475	0.267123	1.78347	1.22775	1.55564	1.47815	1.65438	1.92728	1.12597	1.15654	1.29809	2.05003	1.28356	0.781341	1.1213
YGJ749	-0.080985	0.171615	-0.608403	-0.0781075	-0.708022	-0.726345	-0.141499	-0.404896	-0.278662	-0.919065	-0.175496	-0.431344	-0.109432	-0.152964	-0.158966	0	-0.1999	-0.311511	0	-0.200021	-0.16305	0	0.273597	0	-0.306697	-0.116156	-0.470694	0.134049	-0.570873	-0.540522	-0.151084	-0.111118	-0.251538	0.0695168	-0.156643	-0.220667	0	-0.545668	-0.222234	0.105582	-0.264701	-0.202872	-0.333622	0	-0.299559	0.113891	-0.345575	-0.0976676	-0.210243
YGJ750	0.404925	0.429036	0.608403	0.156215	0.283209	1.18031	0.424496	0.404896	0.417993	1.13116	0.526487	0.916605	0.43773	0.0917782	-0.476899	0.584978	0.599701	0.700901	0.819073	0.866758	0.489149	-0.0870827	0.547194	0.102028	0.204465	0.232312	0.564833	-0.402146	0.685047	0.720696	-0.0710981	0	0.628846	0.486618	0.391607	0.336808	0.254782	0.682085	0.555585	-0.422329	0.794104	0.710052	0.417027	0.220293	0.499265	-0.113891	0.345575	0.0976676	0.630729
YGJ752	-1.29576	-0.94388	-1.82521	-0.781075	-1.13284	-0.907931	-0.99049	-1.41713	-0.835986	-1.41395	-0.994475	-1.61754	-0.984892	0.321224	-0.953798	-1.3162	-0.999502	-1.09029	-1.1831	-1.33347	-0.597849	-1.56749	-0.273597	-0.816222	-2.24911	-1.16156	-0.376555	-0.670243	-0.799222	-1.02099	0.159971	-1.11118	-0.880384	-1.18179	-1.17482	-0.232281	-1.65608	-0.818502	-1.44452	-0.739076	-1.05881	-1.1158	-0.667243	-0.605806	-1.59765	-0.911126	-0.641781	-0.651117	-1.26146
YGJ753	0.64788	0.600651	0.456302	0.468645	0.424813	0.181586	0.848991	0.202448	0.417993	0	0.175496	0.26959	0.766027	-0.0535373	0.635865	0.584978	0.399801	0.623023	0.637056	0.333368	0.489149	0.783745	1.36799	0.612166	0.102232	0.232312	0.470694	0.402146	0.685047	0.120116	-0.0533236	0.222237	0.251538	0.20855	0.704892	-0.104527	0.636954	0.272834	0.555585	0.844658	0.132351	0.811488	-0.0834054	0.440586	0.499265	0.797235	0.197471	0.162779	0.280324
YGJ754	0.566895	0.772266	0.456302	0.702967	0.708022	0.0907931	1.13199	0.708567	0.626989	0.353487	0.40949	0.593098	0.656594	-0.0152964	0.794832	1.02371	0.533068	0.778778	0.728064	0.533389	0.597849	0.696662	0.136799	0.816222	0.306697	0.464624	0.376555	0.402146	0.570873	0.360348	0	0.555591	0.125769	0.486618	1.01818	-0.0116141	0.764345	0.682085	0.555585	0.844658	0.463227	0.811488	0.250216	0.440586	0.599118	1.2528	0.345575	0.423226	0.560648
YGJ755	0.728865	0.514844	0.152101	0	0.424813	1.72507	1.27349	0.303672	0.208996	0.777671	0.40949	0.593098	0.984892	0.0764818	0.794832	0.877467	0.133267	0.233634	1.27411	0.866758	1.03265	0.870827	-0.273597	0.510139	1.73795	0.232312	0.188278	0.268097	0.685047	0.240232	-0.106647	0.777828	0.880384	0.903718	0.861535	0.197439	0.636954	0.818502	1.00005	0.950241	0.99263	0.405744	0.208513	0.826099	1.29809	0.683345	-0.0987356	0.227891	1.05121
YGJ757	-0.728865	-0.772266	-0.912604	-1.40593	-0.708022	-0.907931	-1.41499	-0.911015	-0.696655	-1.41395	-0.877478	-1.45579	-0.875459	-0.0305927	-0.476899	-1.09683	-1.26604	-0.700901	-1.27411	-1.0001	-1.03265	-1.04499	0	-0.918249	-0.817859	-0.929249	-0.658972	-0.670243	-0.114175	-1.50145	0.604334	-1.77789	-0.880384	-1.18179	-1.48811	-0.220667	-0.764345	-1.09134	-0.777819	-1.05582	-1.32351	-0.608616	-1.20938	-0.991319	-1.09838	-1.02502	-0.592414	-0.813897	-1.05121
YGJ758	-0.404925	-0.514844	-0.608403	-1.0154	0.141604	0.272379	0	-0.404896	-1.18431	-0.141395	-0.40949	-0.593098	-0.109432	0.237094	-0.953798	-0.146245	-0.932869	-0.700901	0.273024	-0.400042	-0.16305	-0.435414	0.820791	-0.306083	-0.204465	-0.696937	-0.470694	-0.402146	-0.685047	-0.780754	-0.29328	0	-0.628846	-0.834201	-0.313285	-0.127755	-0.254782	-0.136417	-0.444468	-0.105582	-0.397052	-0.202872	-0.375324	0.0550733	-0.199706	-0.455563	-0.937988	-0.162779	0
YGJ760	0	-0.0858073	0.456302	0.0781075	-0.283209	1.08952	-0.282997	0.303672	0.139331	1.06046	0.350991	0.215672	-0.656594	0.0382409	0.158966	-0.365611	0.1999	0.233634	-0.182016	0.266695	0.27175	-0.348331	0.273597	0.408111	-0.204465	-0.232312	0.470694	0	-0.114175	0.360348	-0.0799854	-0.444473	-0.125769	-0.0695168	-0.469928	0.139369	0	0.136417	0.222234	-0.739076	0.463227	0	0.125108	-0.16522	0.099853	-0.455563	0.0493678	0.130223	-0.210243
YGJ763	-1.53871	-1.45872	-0.912604	-0.702967	-0.566418	0.0907931	0.282997	-1.82203	-1.60231	-0.212092	-1.52096	-0.700934	-0.656594	0.581262	-0.476899	-0.584978	-0.732968	-1.32392	0	-0.73341	-1.25005	-0.870827	-0.683993	-1.22433	0.204465	-1.39387	-0.658972	-1.20644	-1.02757	-0.540522	-0.0622109	-0.777828	-1.635	-1.11227	-0.548249	0.569089	-0.891735	-1.50059	-1.11117	-0.633494	-1.25733	-1.31867	-0.0417027	-0.440586	-0.499265	-0.569454	-1.3823	-0.813897	0
YGJ764	0.890835	0.429036	0.456302	0	0.849627	-0.363172	0.848991	0	-0.139331	-0.0706973	0.0584985	0	0.984892	-0.0458891	0.635865	0.804345	0.1999	0.311511	0.637056	0.466716	0.597849	1.13208	0.683993	0.612166	0.102232	0	0.0941388	0.536194	0.913396	0.120116	-0.115534	0.222237	0.503076	0.347584	0.783214	-0.116141	0.509563	0.409251	0.888936	0.950241	-0.0661754	0.710052	0.0834054	0.771026	0.599118	1.13891	0	0.260447	0.981134
YGJ765	-0.80985	-0.514844	-1.52101	-1.17161	-0.424813	-1.3619	0	-0.708567	-1.04498	-0.494881	-0.760481	-1.02444	-0.547162	0.0688336	-1.58966	-0.438734	-1.1994	-0.778778	-0.546048	-0.666737	-0.815249	-0.435414	0.136799	-0.510139	-0.613394	-0.929249	-0.658972	-0.268097	-0.913396	-0.840812	-0.231069	-0.777828	-1.25769	-0.556134	-0.704892	-0.267123	-0.636954	-1.36417	-0.888936	-0.422329	-0.463227	-1.1158	-0.583838	-0.33044	-1.29809	-0.341672	-1.2342	-0.260447	0
YGJ767	1.94364	1.71615	2.12941	1.87458	2.26567	1.72507	2.97147	1.61958	1.46297	1.69674	1.46246	1.34795	2.73581	0.0688336	2.54346	2.04742	1.73247	1.86907	2.00218	1.73352	2.22835	2.26415	2.73597	2.24461	2.35134	1.62619	1.50622	2.54692	2.05514	1.38133	0.133309	1.88901	2.26384	2.01599	2.11468	0.185825	2.16564	2.59192	1.66676	2.21723	1.65438	1.72441	0.792351	1.43191	2.29662	2.84727	1.13546	0.683673	1.75202
YGJ768	-0.48591	-0.858073	-0.760503	-1.32783	0	-0.363172	0	-0.50612	-0.905651	-0.424184	-0.701982	-0.700934	0	-0.0305927	-0.476899	-0.438734	-0.533068	-0.700901	0	-0.400042	-0.489149	-0.0870827	0.547194	-0.510139	0.102232	-0.929249	-0.564833	-0.402146	-0.456698	-0.360348	-0.239956	-0.111118	-0.880384	-0.139034	-0.313285	-0.127755	-0.382172	-0.818502	-0.111117	-0.422329	-0.198526	-0.811488	-0.959162	-0.220293	-0.898677	-0.113891	-0.987356	-0.325559	0.210243
YGJ769	0.16197	-0.257422	0	-0.468645	0.424813	-0.453966	0.565994	-0.202448	-0.696655	-0.706973	-0.350991	-0.485262	0.328297	-0.0611854	0.317933	0.146245	-0.266534	-0.389389	0.0910081	-0.200021	-0.0543499	0.348331	0.95759	-0.408111	-0.408929	0.116156	-0.470694	-0.134049	-0.114175	-0.60058	-0.19552	-0.111118	-0.377307	0	0.156643	-0.301966	0	0	-0.111117	0.527911	-0.330877	0	-0.500432	0.110147	0.099853	0.569454	-0.592414	0.0325559	0.70081
YGJ771	-1.70068	-1.45872	-0.912604	-0.62486	-1.69925	-1.81586	0.565994	-1.61958	-1.95063	-0.494881	-1.57946	-0.970523	-0.984892	1.41491	-0.635865	-1.9743	-0.866235	-1.01241	-0.182016	-1.20013	-0.923948	-0.609579	-0.547194	-1.1223	-2.14688	-1.27772	-0.75311	-0.536194	0	-1.32128	1.36864	-2.00013	-0.377307	-1.2513	-0.861535	1.50983	-1.4013	-0.682085	-1.22229	-1.05582	-1.19116	-0.710052	0.834054	-0.275366	-1.29809	-0.341672	-0.691149	-1.04179	-0.210243
YGJ775	-1.53871	-2.05937	-1.36891	-2.42133	-2.40728	-1.54348	-1.13199	-1.82203	-2.15963	-1.06046	-2.33994	-1.88713	-2.95467	2.94455	-1.58966	-2.6324	-1.66584	-2.02482	-1.82016	-2.46693	-2.77185	-1.48041	-2.73597	-1.73447	-1.63572	-1.8585	-1.78864	-2.41287	0	-1.1411	2.49732	-2.22237	-1.635	-1.80744	-1.17482	1.85825	-2.29303	-2.18267	-2.11122	-1.47815	-0.727929	-1.52154	1.25108	-1.26669	-1.79735	-1.70836	0.345575	-1.49757	-1.05121
YGJ782	0.16197	-0.0858073	0.152101	0.156215	0	-0.453966	0.565994	0.303672	0.139331	-0.494881	0	0.161754	0.109432	-0.0611854	0.794832	0.6581	0.333167	0.467267	-0.0910081	0.133347	-0.597849	0.696662	0.410396	0.612166	0.204465	-0.232312	0.188278	0.804291	0.342524	0	-0.115534	0.444473	0.125769	0	0.548249	-0.150983	0.382172	0	0.333351	0.633494	-0.330877	0.101436	-0.0834054	0.16522	0.099853	0.569454	0.0987356	0.162779	0.420486
YGJ783	1.21477	0.94388	1.0647	1.0935	0.708022	0.726345	1.55648	0.708567	0.278662	0.706973	0.526487	0.700934	1.64149	-0.00764818	2.3845	1.24308	0.799602	1.09029	1.0921	0.933431	1.03265	1.56749	2.46237	1.02028	1.32902	0.813093	0.376555	1.60858	0.799222	0.540522	-0.00888727	1.33342	0.880384	1.11227	1.25314	0	1.27391	1.22775	0.777819	1.7949	0.794104	1.01436	0.333622	1.04639	1.39794	1.48058	0.394942	0.358114	1.1213
YGJ786	-1.94364	-0.772266	-0.456302	-0.859182	-0.283209	-0.726345	0	-1.21469	-1.88097	-0.848368	-1.05297	-0.431344	-0.43773	1.37667	0	-1.46245	-0.0666335	-1.55756	0	-1.46682	-0.706549	-1.30624	-0.273597	-0.918249	-0.613394	-0.696937	-0.941388	-0.402146	-0.913396	0.120116	0.497687	-0.777828	-0.377307	-1.52937	-0.783214	1.99762	-1.14652	-0.409251	-0.777819	-0.844658	-1.85291	-1.4201	1.41789	-0.49566	0.199706	-0.911126	-0.148103	-0.813897	-0.210243
YGJ787	-1.37674	-1.80195	-0.760503	-1.32783	-0.849627	-1.18031	0.424496	-1.82203	-1.67197	-0.919065	-1.46246	-0.593098	-0.766027	1.17782	0.158966	-1.3162	-0.732968	-1.47968	-0.182016	-1.46682	-1.03265	-0.609579	-1.09439	-1.42839	-1.94241	-1.27772	-0.658972	-1.07239	-0.685047	-1.08104	1.0487	-1.00006	-1.25769	-1.39034	-1.0965	0.987195	-1.14652	-1.22775	-1.77787	-1.16141	-1.25733	-1.92728	-0.0834054	-0.605806	-0.99853	-1.13891	-0.543046	-0.781341	-0.140162
YGJ790	0	-0.0858073	0	-0.93729	0.424813	-0.726345	0.848991	-0.607343	-0.76632	-0.706973	-0.233994	-0.431344	0.43773	-0.107075	0.476899	0.0731223	-0.932869	0	0.182016	-0.266695	-0.16305	0.261248	0	-0.306083	0.204465	-0.464624	-0.470694	0	-0.456698	-0.660638	-0.213294	0.222237	-0.125769	0.278067	0	-0.162597	0	-0.136417	-0.777819	0.527911	-0.397052	-0.405744	-0.542135	0.220293	0.199706	0.227782	-0.543046	0	0.350405
YGJ791	-1.0528	-0.94388	-0.912604	-0.702967	-0.991231	-0.544759	0.282997	-0.809791	-0.975317	-1.13116	-0.994475	-0.754852	-0.43773	0.206501	-0.635865	-0.584978	-0.732968	-0.934534	-0.819073	-1.13345	-0.380449	-0.696662	-0.273597	-0.918249	-0.613394	-0.813093	-1.12967	-0.134049	-0.456698	-0.840812	-0.115534	-0.888946	-0.880384	-1.04275	-0.939856	0.0464562	-0.382172	-0.136417	-0.777819	-0.527911	-0.529403	-0.811488	-0.959162	-0.33044	-1.19824	0	-0.839253	-0.358114	-0.280324
YGJ792	0.16197	0.858073	0.304201	0.468645	0.566418	0	0.141499	0.708567	0.417993	0.141395	0.40949	0.377426	-0.218865	-0.107075	0.317933	0.584978	0.533068	0.311511	-0.0910081	0.466716	0.489149	-0.348331	0.410396	0.510139	-0.102232	0.232312	1.03553	0.402146	0.570873	0.360348	0.0355491	0	0.377307	0.347584	0.234964	-0.0116141	0.127391	0	0.444468	-0.105582	0.264701	0.608616	0.291919	-0.16522	0	0.227782	0.345575	0.358114	-0.070081
YGJ799	-1.21477	-0.514844	-1.0647	-1.17161	-1.27444	-0.907931	-1.55648	-1.61958	-0.975317	-0.989763	-0.994475	-1.29403	-1.96978	-0.0611854	-1.27173	-1.16996	-1.5992	-1.47968	-1.72915	-1.2668	-1.03265	-1.30624	-0.683993	-1.22433	-1.84018	-1.0454	-0.75311	-1.34049	-0.456698	-1.50145	0.710981	-1.33342	-1.38346	-1.80744	-1.56643	-0.243895	-1.27391	-1.50059	-1.66676	-1.90048	-1.58821	-0.710052	-1.5013	-1.10147	-0.99853	-1.36669	-0.641781	-0.716229	-1.75202
YGJ809	1.29576	1.28711	1.36891	1.64026	0.566418	1.3619	0.848991	1.01224	1.32364	1.55534	1.05297	1.13228	0.766027	0	0.635865	1.09683	1.1994	1.47968	0.637056	1.06678	1.35875	0.609579	0.273597	1.1223	0.306697	1.39387	1.50622	0.536194	1.25592	0.90087	0.151084	0.555591	1.13192	0.417101	0.783214	0.174211	1.14652	0.545668	0.666702	0.422329	1.45586	1.4201	0.750648	0.385513	0.599118	0.569454	1.03672	0.683673	0.070081
YGJ811	0.16197	0.257422	0.456302	0.0781075	-0.141604	0.544759	-0.848991	0.202448	0.487658	0.706973	-0.0584985	0.107836	-0.984892	0.0152964	-0.794832	-0.219367	0	0	-0.546048	0.400042	-0.0543499	-0.435414	-0.136799	-0.102028	-0.511162	0.116156	0.376555	0	-0.570873	0.120116	-0.0533236	-1.00006	-0.125769	-0.139034	-0.234964	0.0464562	-0.254782	-0.136417	-0.222234	-0.211165	0.132351	0.101436	0.125108	0	-0.099853	-0.455563	0	0.0325559	-0.070081
YGJ812	-1.13379	-1.80195	-1.52101	-1.40593	-1.13284	-1.45269	-0.282997	-1.61958	-1.88097	0.0706973	0.643484	-1.5097	-1.86035	2.5086	-1.27173	-1.53557	-1.1994	-1.47968	-1.00109	-1.93354	-1.14135	-2.35123	-1.50478	-1.8365	-1.32902	-2.20697	-1.60036	-1.47453	-1.48427	0.360348	3.86596	-2.4446	-1.38346	-2.36357	0.626571	2.74092	-2.16564	-2.04626	-3.11128	-2.32281	-0.86028	-1.82585	5.08773	-1.26669	-2.59618	-1.13891	1.13546	-1.79057	-0.420486
YGJ813	-0.80985	-0.686458	-0.608403	0.156215	-0.424813	0.726345	-0.707493	-0.607343	-0.696655	0.565579	-0.350991	0.26959	-0.109432	0.397705	-0.794832	-0.365611	-0.1999	0.0778778	0.45504	0	-0.27175	-0.609579	0.136799	-0.612166	0.306697	-0.580781	-0.75311	-0.93834	-0.456698	0.720696	-0.213294	-0.111118	-0.125769	-0.417101	-0.156643	0.603931	-0.636954	-1.09134	-0.222234	-0.527911	-0.264701	-0.405744	0.125108	0	0.199706	-0.341672	-0.345575	-0.455782	0.070081
YGJ816	-0.404925	-0.858073	-1.36891	-0.702967	0	-0.181586	-0.848991	-1.21469	-0.626989	-0.424184	-0.584985	-0.485262	-0.656594	0.321224	-1.11276	-0.584978	-0.799602	-0.700901	-0.182016	-0.933431	-0.489149	-0.95791	-0.273597	-0.612166	-0.715626	-0.696937	-1.31794	-1.20644	-0.570873	0.180174	-0.213294	-1.00006	-0.880384	-0.903718	-0.548249	0.209053	-1.27391	-1.09134	-0.444468	-0.527911	-0.727929	-1.62298	-0.0417027	-0.33044	-0.299559	-0.911126	-1.2342	-0.488338	-0.140162
YGJ817	1.86265	2.4026	2.28151	2.34322	2.12407	2.17903	1.98098	2.02448	1.88097	2.40371	1.69646	1.61754	1.42262	0.0764818	2.06656	1.9743	1.93237	2.02482	1.72915	1.60017	1.90225	1.48041	1.64158	1.73447	1.73795	1.97465	3.01244	2.27883	2.51184	1.68162	0.266618	1.55566	2.01231	1.73792	1.80139	0.360036	1.78347	2.18267	1.88899	1.26699	2.18379	1.82585	1.29278	0.936246	1.39794	1.93614	1.57977	0.911564	0.911053
YGJ818	0.97182	1.71615	1.36891	1.64026	1.84086	1.18031	1.41499	1.41713	1.32364	1.41395	1.05297	1.24011	1.42262	0.00764818	0.953798	1.16996	1.46594	1.55756	1.27411	1.20013	1.25005	1.13208	1.23119	1.42839	1.12456	1.16156	1.41208	1.07239	1.71262	1.20116	0.151084	1.11118	1.00615	0.417101	0.939856	0.150983	1.4013	0.818502	1.3334	0.844658	0.99263	1.4201	0.875756	0.660879	1.19824	1.70836	0.987356	0.651117	0.560648
YGJ819	2.10561	-1.63034	-0.608403	-0.859182	0.141604	0.907931	-0.424496		0.487658	-0.141395	7.42931	8.03378	0.109432	9.07839	0.953798	-0.950589	4.06464	1.01241	8.09972	-1.13345	-2.88055	0.783745	-1.09439	4.99936	1.32902	-3.36853	-0.470694	-0.134049	-0.570873	9.12882	10.567	0.222237	-0.754615	-0.486618	0.783214	10.1623	0.636954	0.818502	-1.00005	1.47815	-0.198526		2.71067	12.5567	1.19824	0.227782	9.13304	13.999	11.0728
YGJ820	0.566895	0.257422	0.456302	0.62486	0	0.181586	0.848991	0	0.417993	0.141395	0.233994	0.377426	0.328297	-0.114723	0.317933	0.511856	0.466434	0.467267	0.182016	0.466716	0.706549	0.609579	1.09439	0.816222	-0.204465	0.580781	0.658972	1.07239	0	-0.180174	-0.0355491	-0.111118	0.125769	0.347584	0.391607	-0.0696844	0.509563	0.545668	0.222234	0	0.397052	0.608616	0.125108	0.16522	0.299559	0.683345	0.296207	0	0.070081
YGJ825	-0.404925	-0.686458	-0.456302	-0.781075	0	0.635552	0	-0.607343	-0.975317	0.565579	-0.467988	-0.26959	0.109432	0.290631	-0.476899	-0.6581	-0.599701	-0.856656	0.0910081	-0.266695	-0.16305	-0.348331	0.410396	-0.408111	0.306697	-0.348468	-0.658972	-0.268097	-0.228349	0.240232	-0.311054	0.333355	-0.503076	-0.0695168	-1.01818	0.185825	-0.636954	-0.682085	0.111117	-0.739076	0.0661754	-1.1158	-0.208513	0.220293	0.199706	0.113891	-0.888621	-0.227891	0.070081
YGJ827	0.242955	-0.0858073	-0.152101	-0.390537	0.424813	1.18031	1.13199	-0.202448	-0.208996	0.706973	0.0584985	-0.107836	0.656594	0.0305927	0.317933	0.146245	-0.266534	-0.467267	0.364032	0.200021	0.27175	0.348331	-0.410396	0.204055	0.817859	0	-0.188278	0.268097	0.570873	-0.180174	-0.177745	0.333355	0.251538	0.347584	-0.0783214	0.0580703	0.127391	0.136417	0.444468	0.633494	0.529403	-0.101436	-0.125108	0.33044	0.299559	0.455563	-0.296207	0.130223	0.560648
YGJ830	-1.37674	-1.11549	-1.0647	-0.468645	-0.991231	-1.08952	-0.99049	-0.607343	-1.32364	-1.13116	-1.34547	-0.700934	-0.984892	0.512428	-1.11276	-1.53557	-1.7991	-1.01241	-0.819073	-0.800084	-1.25005	-1.82874	-0.547194	-1.02028	-1.32902	-1.0454	-0.847249	-1.47453	-0.913396	-0.660638	0.533236	-1.11118	-1.13192	-1.87695	-1.64475	0.452948	-1.27391	-1.09134	-1.66676	-1.58373	-0.926455	-1.31867	0.0834054	-0.660879	-1.09838	-1.36669	-0.740517	-0.748785	-0.70081
YGJ833	-1.0528	-1.2013	-1.67311	-1.0154	-1.84086	-1.3619	-1.69798	-1.82203	-1.39331	-1.13116	-1.11147	-1.29403	-1.86035	0.435946	-2.3845	-2.04742	-1.86574	-1.71331	-1.36512	-2.2669	-1.46745	-2.0029	-1.64158	-1.32636	-1.73795	-1.51003	-1.6945	-1.60858	-0.913396	-2.34226	0.74653	-2.55572	-1.13192	-2.01599	-2.42796	0.406492	-1.65608	-1.637	-2.22234	-2.00606	-1.85291	-2.02872	-0.208513	-1.32176	-2.29662	-2.27782	-1.03672	-1.00923	-1.82211
[truncated: 53 more columns]
